# Supplementary material for: Dissecting clinical outcome of porcine circovirus type 2 with in vivo derived transcriptomic signatures of host tissue responses
Source: PubMed Central journal article supplement (PMC6247532; doi:10.1186/s12864-018-5217-5), 2018-11-20
Supplement: 12864_2018_5217_MOESM2_ESM.pdf [file 12864_2018_5217_MOESM2_ESM.pdf]

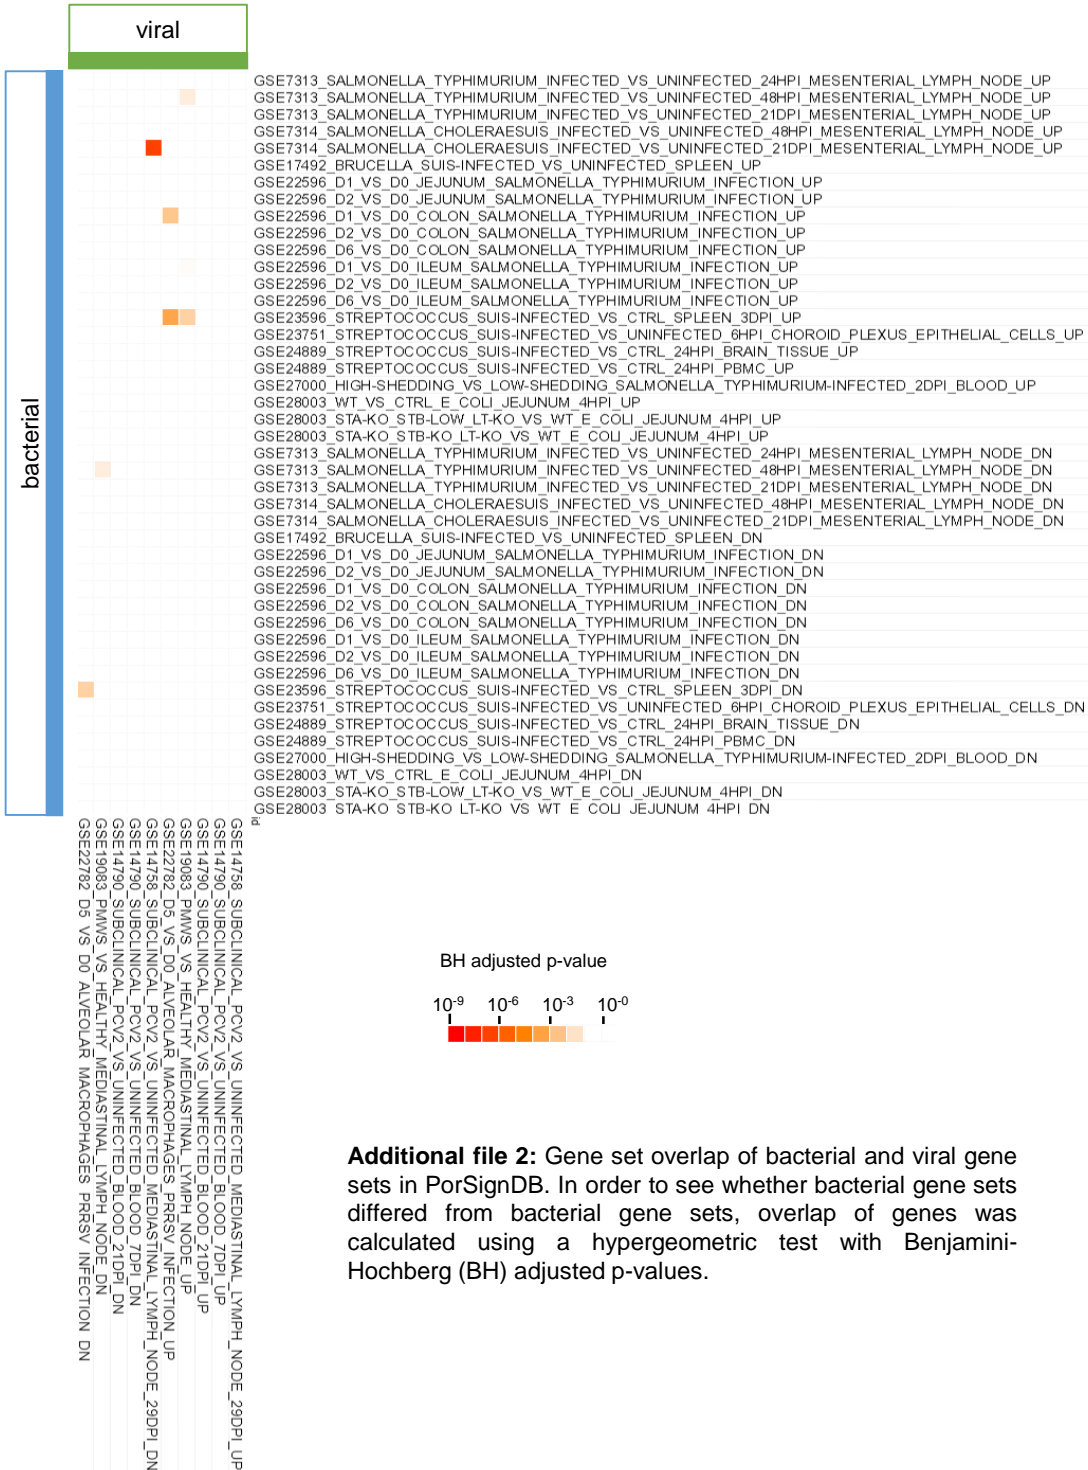

**Additional file 2:** Gene set overlap of bacterial and viral gene sets in PorSignDB. In order to see whether bacterial gene sets differed from bacterial gene sets, overlap of genes was calculated using a hypergeometric test with Benjamini-Hochberg (BH) adjusted p-values.
