# Supplementary material for: Dissecting clinical outcome of porcine circovirus type 2 with in vivo derived transcriptomic signatures of host tissue responses
Source: PubMed Central journal article supplement (PMC6247532; doi:10.1186/s12864-018-5217-5), 2018-11-20
Supplement: 12864_2018_5217_MOESM6_ESM.pdf [file 12864_2018_5217_MOESM6_ESM.pdf]

PorSignDB performance in lymph nodes of PMWS pigs VS healthy pigs

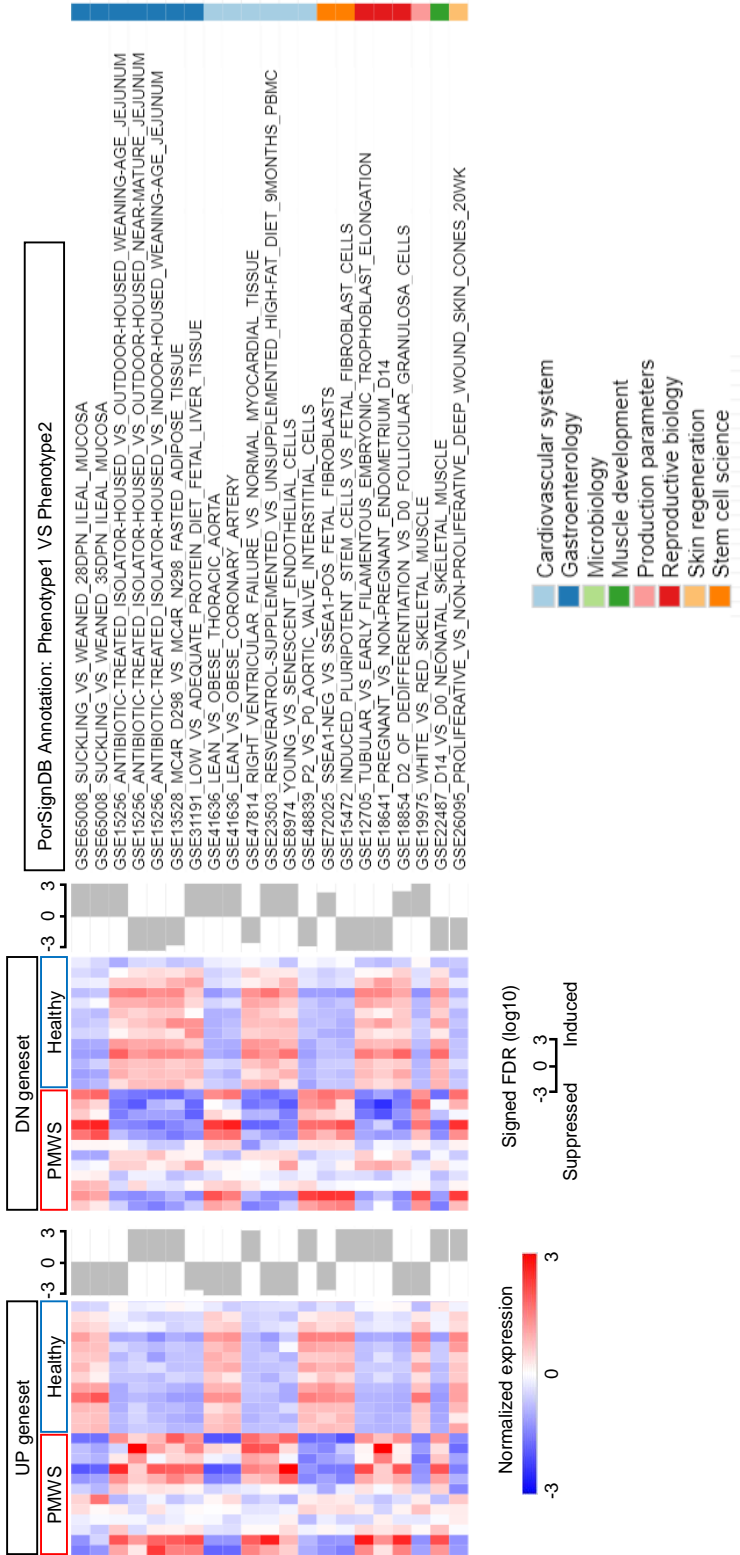

**Additional file 6:** Enriched PorSignDB gene sets in the PMWS field study pertaining to biological themes other than microbiology. The average expression of the leading-edge genes in every gene set (genes that contribute to the enrichment) are displayed for each patient sample. Bars next to each gene set indicate the signed FDR for its enrichment in log10 scale.
