# Supplementary material for: Dissecting clinical outcome of porcine circovirus type 2 with in vivo derived transcriptomic signatures of host tissue responses
Source: PubMed Central journal article supplement (PMC6247532; doi:10.1186/s12864-018-5217-5), 2018-11-20
Supplement: 12864_2018_5217_MOESM9_ESM.pdf [file 12864_2018_5217_MOESM9_ESM.pdf]

## Additional file 9

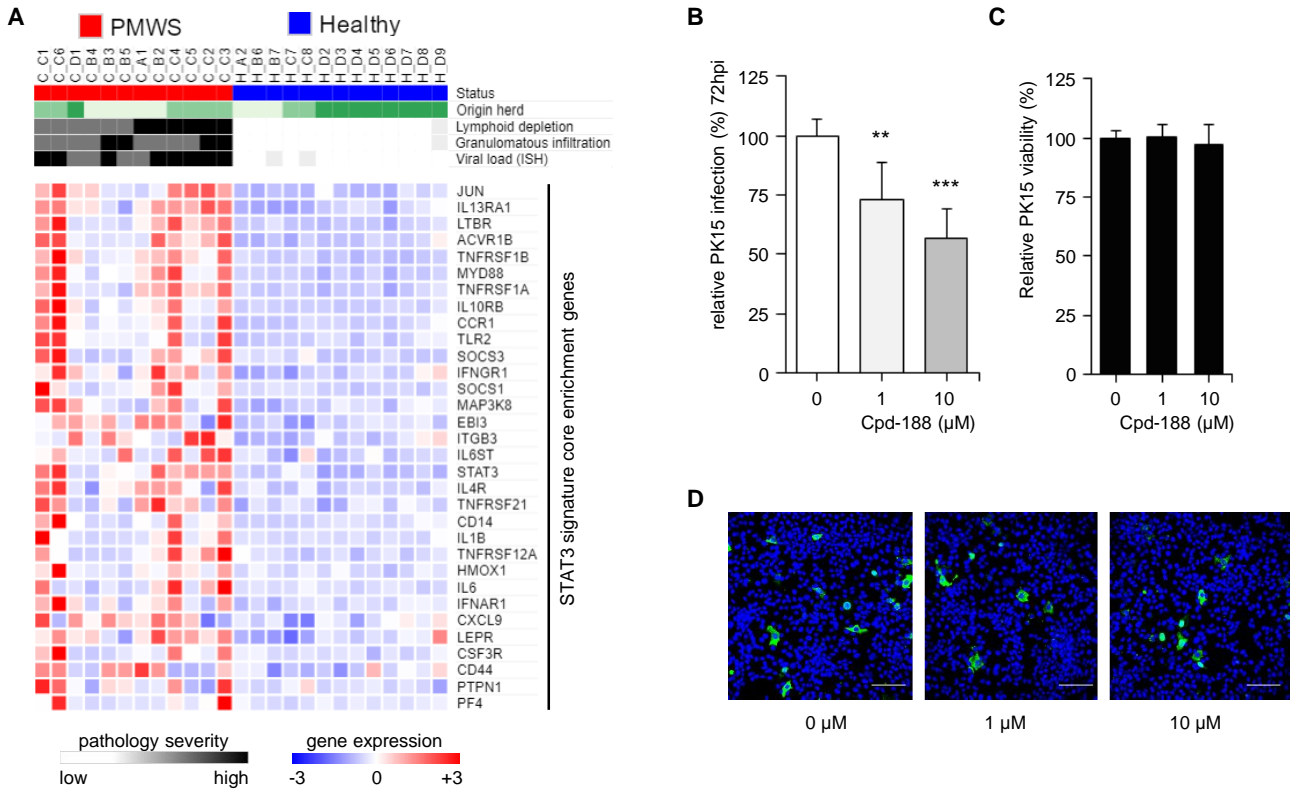

**Additional file 9: STAT3 as a host factor in PCV2 disease** **A** Core genes responsible for the STAT3 signature enrichment score. **B** STAT3-specific inhibitor cpd-188 impairs infection in PK-15 cells. Means  $\pm$  sd represent three independent experiments in triplicate ( $n=9$ ; \*\* $P<0.01$ , \*\*\* $P<0.001$ , Mann-Whitney U test). **C** MTT viability assay of cpd-188 treatment in PK-15 cells. Means  $\pm$  sd are shown for three independent experiments in quintuplicate ( $n=15$ ). **D** Infection assessment by PCV2 capsid immunostaining, representative figures for each treatment. Scale bar: 100  $\mu\text{m}$ .
