# Supplementary material for: Dissecting clinical outcome of porcine circovirus type 2 with in vivo derived transcriptomic signatures of host tissue responses
Source: BMC Genomics. 2018 Nov 20;19:831. doi: 10.1186/s12864-018-5217-5 (PMC6247532; doi:10.1186/s12864-018-5217-5)
Supplement: Supplementary file 1 — GO biological process term enrichment of every gene set in PorSignDB. (XLSX 662 kb) [file 12864_2018_5217_MOESM1_ESM.xlsx]

## Sheet: Sheet1
Additional file 1: GO biological process term enrichment of every gene set in PorSignDB
Gene set 1	GSE7313_SALMONELLA_TYPHIMURIUM_INFECTED_VS_UNINFECTED_24HPI_MESENTERIAL_LYMPH_NODE_UP								1
ID	Description	pvalue	p.adjust	GeneRatio	BgRatio	qvalue	geneID	Count	2
GO:0002690	positive regulation of leukocyte chemotaxis	5.38084e-05	0.0414304	7/179	60/10877	0.0379561	972/7422/9750/102/1906/2185/2920	7	3
GO:0046513	ceramide biosynthetic process	5.85859e-05	0.0414304	6/179	42/10877	0.0379561	338596/256435/5562/6609/7132/10558	6	3
GO:0002687	positive regulation of leukocyte migration	6.33919e-05	0.0414304	8/179	83/10877	0.0379561	972/7422/9750/102/1906/2185/2920/6355	8	3
GO:2000147	positive regulation of cell motility	6.39385e-05	0.0414304	17/179	350/10877	0.0379561	27086/972/8650/1672/10396/7422/9750/102/1906/2185/2920/57007/9564/80005/25/1277/6355	17	3
GO:0006672	ceramide metabolic process	6.66513e-05	0.0414304	7/179	62/10877	0.0379561	338596/256435/5562/6609/7132/5518/10558	7	3
GO:0051272	positive regulation of cellular component movement	8.4479e-05	0.0437601	17/179	358/10877	0.0400905	27086/972/8650/1672/10396/7422/9750/102/1906/2185/2920/57007/9564/80005/25/1277/6355	17	3
Gene set 2	GSE7313_SALMONELLA_TYPHIMURIUM_INFECTED_VS_UNINFECTED_24HPI_MESENTERIAL_LYMPH_NODE_DN								1
ID	Description	pvalue	p.adjust	GeneRatio	BgRatio	qvalue	geneID	Count	2
GO:0044772	mitotic cell cycle phase transition	1.07941e-09	2.69096e-06	28/186	433/10877	2.54058e-06	9833/5048/55215/9133/5702/699/93323/1033/4176/51529/348654/1017/9787/57472/23019/115106/22974/9183/8317/23594/6118/2146/25988/64682/63967/29945/8318/1112	28	3
GO:0044770	cell cycle phase transition	4.17896e-09	5.20907e-06	28/186	460/10877	4.91797e-06	9833/5048/55215/9133/5702/699/93323/1033/4176/51529/348654/1017/9787/57472/23019/115106/22974/9183/8317/23594/6118/2146/25988/64682/63967/29945/8318/1112	28	3
GO:0051304	chromosome separation	1.09046e-08	9.06169e-06	11/186	65/10877	8.55529e-06	23310/699/51529/348654/9787/9183/7153/9918/64682/57697/29945	11	3
GO:0098813	nuclear chromosome segregation	1.7514e-08	1.09156e-05	19/186	234/10877	1.03056e-05	23310/5048/699/23244/51529/348654/83540/55055/9787/10388/51203/9183/7153/9918/55869/220134/64682/57697/29945	19	3
GO:0000819	sister chromatid segregation	3.10483e-08	1.54807e-05	17/186	193/10877	1.46156e-05	23310/5048/699/23244/51529/348654/83540/55055/9787/51203/9183/7153/9918/55869/220134/64682/29945	17	3
GO:0007059	chromosome segregation	4.36073e-08	1.69779e-05	20/186	274/10877	1.60291e-05	23310/5048/699/23244/51529/348654/83540/55055/9787/56852/10388/51203/9183/7153/9918/55869/220134/64682/57697/29945	20	3
GO:0000075	cell cycle checkpoint	4.76717e-08	1.69779e-05	16/186	175/10877	1.60291e-05	9984/55215/699/348654/55055/1017/57472/23019/8563/9183/6118/7153/25988/63967/8318/1112	16	3
GO:1901990	regulation of mitotic cell cycle phase transition	9.88442e-08	3.08023e-05	21/186	316/10877	2.9081e-05	5048/55215/5702/699/93323/51529/348654/1017/9787/57472/23019/115106/22974/9183/8317/6118/2146/63967/29945/8318/1112	21	3
GO:0051301	cell division	1.80072e-07	4.988e-05	26/186	482/10877	4.70925e-05	4904/23310/805/5048/9133/699/23244/93323/29882/51529/83540/55055/1017/10388/115106/51203/22974/9183/8317/23594/7153/9918/220134/64682/29945/55752	26	3
GO:0000280	nuclear division	2.15429e-07	5.37065e-05	20/186	302/10877	5.07052e-05	23310/10201/699/3306/23244/3479/51529/348654/83540/9787/10388/51203/22974/9183/7153/9918/64682/57697/29945/10111	20	3
GO:1901987	regulation of cell cycle phase transition	3.2204e-07	7.29861e-05	21/186	339/10877	6.89074e-05	5048/55215/5702/699/93323/51529/348654/1017/9787/57472/23019/115106/22974/9183/8317/6118/2146/63967/29945/8318/1112	21	3
GO:0048285	organelle fission	1.0684e-06	0.000221959	20/186	334/10877	0.000209556	23310/10201/699/3306/23244/3479/51529/348654/83540/9787/10388/51203/22974/9183/7153/9918/64682/57697/29945/10111	20	3
GO:0007093	mitotic cell cycle checkpoint	1.56244e-06	0.000299628	12/186	126/10877	0.000282884	55215/699/348654/55055/1017/57472/23019/9183/6118/7153/63967/1112	12	3
GO:0000070	mitotic sister chromatid segregation	2.0077e-06	0.000348008	12/186	129/10877	0.000328561	23310/699/23244/51529/348654/83540/9787/51203/9183/9918/64682/29945	12	3
GO:0006260	DNA replication	2.09391e-06	0.000348008	16/186	231/10877	0.000328561	9984/5515/23244/3479/4176/5428/6418/1017/8317/23594/6118/63967/57697/5425/8318/10111	16	3
GO:0031570	DNA integrity checkpoint	2.36359e-06	0.000368277	12/186	131/10877	0.000347697	9984/55215/1017/57472/23019/8563/6118/7153/25988/63967/8318/1112	12	3
GO:0051321	meiotic cell cycle	3.43996e-06	0.00050446	13/186	160/10877	0.00047627	23310/5515/699/3306/83540/1017/10388/9183/7153/9918/57697/10111/2956	13	3
GO:0140014	mitotic nuclear division	4.78978e-06	0.000663384	15/186	218/10877	0.000626312	23310/10201/699/23244/3479/51529/348654/83540/9787/51203/22974/9183/9918/64682/29945	15	3
GO:0045786	negative regulation of cell cycle	8.04681e-06	0.00105583	23/186	483/10877	0.000996824	9984/55215/10201/5702/699/5496/1033/348654/4591/55055/1017/57472/23019/8563/9183/8317/6118/7153/2146/25988/63967/8318/1112	23	3
GO:0007091	metaphase/anaphase transition of mitotic cell cycle	1.00068e-05	0.00118795	7/186	45/10877	0.00112157	699/51529/348654/9787/9183/64682/29945	7	3
GO:0044784	metaphase/anaphase transition of cell cycle	1.00068e-05	0.00118795	7/186	45/10877	0.00112157	699/51529/348654/9787/9183/64682/29945	7	3
GO:0010965	regulation of mitotic sister chromatid separation	1.16339e-05	0.00131834	7/186	46/10877	0.00124466	699/51529/348654/9787/9183/64682/29945	7	3
GO:0033045	regulation of sister chromatid segregation	1.38062e-05	0.00143968	8/186	65/10877	0.00135923	699/51529/348654/9787/9183/55869/64682/29945	8	3
GO:0051983	regulation of chromosome segregation	1.38597e-05	0.00143968	9/186	85/10877	0.00135923	699/51529/348654/9787/56852/9183/55869/64682/29945	9	3
GO:0045930	negative regulation of mitotic cell cycle	1.45416e-05	0.00145009	15/186	239/10877	0.00136905	55215/10201/5702/699/348654/55055/1017/57472/23019/9183/6118/7153/2146/63967/1112	15	3
GO:0051306	mitotic sister chromatid separation	1.55488e-05	0.00149089	7/186	48/10877	0.00140758	699/51529/348654/9787/9183/64682/29945	7	3
GO:1905818	regulation of chromosome separation	1.78807e-05	0.00165098	7/186	49/10877	0.00155872	699/51529/348654/9787/9183/64682/29945	7	3
GO:0006261	DNA-dependent DNA replication	3.07537e-05	0.00273818	10/186	117/10877	0.00258516	9984/4176/5428/1017/8317/23594/6118/57697/5425/8318	10	3
GO:1903046	meiotic cell cycle process	3.56184e-05	0.00306195	10/186	119/10877	0.00289084	23310/699/3306/83540/10388/7153/9918/57697/10111/2956	10	3
GO:0010948	negative regulation of cell cycle process	4.26214e-05	0.00354183	15/186	262/10877	0.00334391	55215/10201/5702/699/348654/4591/1017/57472/23019/9183/8317/6118/2146/63967/1112	15	3
GO:0000077	DNA damage checkpoint	4.73472e-05	0.00380763	10/186	123/10877	0.00359485	9984/55215/1017/57472/23019/8563/6118/25988/63967/1112	10	3
GO:0033047	regulation of mitotic sister chromatid segregation	4.90437e-05	0.00382081	7/186	57/10877	0.0036073	699/51529/348654/9787/9183/64682/29945	7	3
GO:1901991	negative regulation of mitotic cell cycle phase transition	5.07265e-05	0.00383216	12/186	177/10877	0.00361801	55215/5702/699/348654/1017/57472/23019/9183/6118/2146/63967/1112	12	3
GO:0007088	regulation of mitotic nuclear division	6.65112e-05	0.00487683	10/186	128/10877	0.0046043	10201/699/3479/51529/348654/9787/51203/9183/64682/29945	10	3
GO:0030071	regulation of mitotic metaphase/anaphase transition	7.25242e-05	0.0050223	6/186	42/10877	0.00474164	699/51529/348654/9787/9183/29945	6	3
GO:1902099	regulation of metaphase/anaphase transition of cell cycle	7.25242e-05	0.0050223	6/186	42/10877	0.00474164	699/51529/348654/9787/9183/29945	6	3
GO:0044774	mitotic DNA integrity checkpoint	9.84067e-05	0.00659715	8/186	85/10877	0.00622848	55215/1017/57472/23019/6118/7153/63967/1112	8	3
GO:1901988	negative regulation of cell cycle phase transition	0.000100558	0.00659715	12/186	190/10877	0.00622848	55215/5702/699/348654/1017/57472/23019/9183/6118/2146/63967/1112	12	3
GO:0006281	DNA repair	0.000122842	0.00785246	18/186	390/10877	0.00741364	55215/23244/57103/5428/348654/1017/56852/2967/8317/6118/25988/63967/57697/5425/57599/8318/10111/2956	18	3
GO:0006270	DNA replication initiation	0.00013952	0.0086182	5/186	30/10877	0.00813659	4176/1017/8317/23594/8318	5	3
GO:0000086	G2/M transition of mitotic cell cycle	0.000141735	0.0086182	12/186	197/10877	0.00813659	9833/5048/55215/9133/5702/93323/1017/115106/22974/8317/63967/1112	12	3
GO:0051783	regulation of nuclear division	0.000177809	0.0105542	10/186	144/10877	0.00996444	10201/699/3479/51529/348654/9787/51203/9183/64682/29945	10	3
GO:0090305	nucleic acid phosphodiester bond hydrolysis	0.000268663	0.0155762	12/186	211/10877	0.0147058	10248/10146/5428/348654/57472/23019/2967/6118/83940/57697/5425/10111	12	3
GO:2001251	negative regulation of chromosome organization	0.000285719	0.0161886	8/186	99/10877	0.0152839	3178/699/348654/6418/9183/7153/55869/10111	8	3
GO:0044839	cell cycle G2/M phase transition	0.000292976	0.0162309	12/186	213/10877	0.0153238	9833/5048/55215/9133/5702/93323/1017/115106/22974/8317/63967/1112	12	3
GO:0006310	DNA recombination	0.000316062	0.0171292	11/186	184/10877	0.0161719	9984/348654/8317/3838/6118/7153/57697/57599/8318/10111/2956	11	3
GO:0010389	regulation of G2/M transition of mitotic cell cycle	0.000376785	0.0199856	10/186	158/10877	0.0188688	5048/55215/5702/93323/1017/115106/22974/8317/63967/1112	10	3
GO:0044773	mitotic DNA damage checkpoint	0.000423528	0.021997	7/186	80/10877	0.0207677	55215/1017/57472/23019/6118/63967/1112	7	3
GO:0016311	dephosphorylation	0.000506526	0.0257708	16/186	364/10877	0.0243307	805/92370/84064/3476/5515/5496/1033/57103/5532/54886/3636/6418/9787/5529/9107/5534	16	3
GO:0033044	regulation of chromosome organization	0.000521188	0.0259864	13/186	260/10877	0.0245342	3178/699/51529/348654/6418/9787/9183/7153/55869/64682/29945/8318/10111	13	3
GO:0007062	sister chromatid cohesion	0.000548544	0.0268141	8/186	109/10877	0.0253157	5048/699/23244/83540/55055/9183/55869/220134	8	3
GO:0032508	DNA duplex unwinding	0.000586817	0.0281334	6/186	61/10877	0.0265612	10146/4176/2967/7153/8318/10111	6	3
GO:0045931	positive regulation of mitotic cell cycle	0.00061933	0.0291319	8/186	111/10877	0.0275039	5048/3479/51529/348654/9787/51203/8317/8318	8	3
GO:0000082	G1/S transition of mitotic cell cycle	0.000695587	0.0319803	11/186	202/10877	0.0301932	1033/4176/1017/57472/23019/8317/23594/6118/2146/25988/8318	11	3
GO:0070192	chromosome organization involved in meiotic cell cycle	0.000705542	0.0319803	5/186	42/10877	0.0301932	23310/699/10388/9918/10111	5	3
GO:1902749	regulation of cell cycle G2/M phase transition	0.000839556	0.0373752	10/186	175/10877	0.0352866	5048/55215/5702/93323/1017/115106/22974/8317/63967/1112	10	3
GO:0070979	protein K11-linked ubiquitination	0.000921876	0.04032	4/186	26/10877	0.0380668	29882/51529/64682/29945	4	3
GO:0051028	mRNA transport	0.00103485	0.0422573	8/186	120/10877	0.0398958	3178/9984/29107/10250/23039/84811/9631/8563	8	3
GO:0044843	cell cycle G1/S phase transition	0.00103508	0.0422573	11/186	212/10877	0.0398958	1033/4176/1017/57472/23019/8317/23594/6118/2146/25988/8318	11	3
GO:0006913	nucleocytoplasmic transport	0.00103792	0.0422573	13/186	280/10877	0.0398958	3178/9984/29107/10250/3479/23039/84811/6418/9631/8563/3838/9147/51319	13	3
GO:0030261	chromosome condensation	0.00106787	0.0422573	4/186	27/10877	0.0398958	23310/51203/7153/9918	4	3
GO:0044068	modulation by symbiont of host cellular process	0.00106787	0.0422573	4/186	27/10877	0.0398958	2597/5272/4916/3838	4	3
GO:1901976	regulation of cell cycle checkpoint	0.00106787	0.0422573	4/186	27/10877	0.0398958	9984/348654/8563/6118	4	3
GO:0051052	regulation of DNA metabolic process	0.00108555	0.0422855	14/186	317/10877	0.0399225	3178/9984/5515/23244/3479/8932/57103/1017/8317/3838/6118/55869/10111/2956	14	3
GO:0032392	DNA geometric change	0.00113191	0.0432034	6/186	69/10877	0.0407891	10146/4176/2967/7153/8318/10111	6	3
GO:0051169	nuclear transport	0.00114377	0.0432034	13/186	283/10877	0.0407891	3178/9984/29107/10250/3479/23039/84811/6418/9631/8563/3838/9147/51319	13	3
GO:0045787	positive regulation of cell cycle	0.00121924	0.044809	13/186	285/10877	0.042305	9984/5048/3479/51529/348654/1017/9787/57472/23019/8563/51203/8317/8318	13	3
GO:0032780	negative regulation of ATPase activity	0.0012402	0.044809	3/186	13/10877	0.042305	5018/93974/7139	3	3
GO:2000001	regulation of DNA damage checkpoint	0.0012402	0.044809	3/186	13/10877	0.042305	9984/8563/6118	3	3
GO:0071103	DNA conformation change	0.00128233	0.0456693	10/186	185/10877	0.0431172	23310/10146/4176/6418/51203/2967/7153/9918/8318/10111	10	3
Gene set 3	GSE7313_SALMONELLA_TYPHIMURIUM_INFECTED_VS_UNINFECTED_48HPI_MESENTERIAL_LYMPH_NODE_UP								4
ID	Description	pvalue	p.adjust	GeneRatio	BgRatio	qvalue	geneID	Count	5
GO:0060333	interferon-gamma-mediated signaling pathway	1.78921e-07	0.000526029	10/186	67/10877	0.000493274	3122/2634/83666/3120/3136/567/2633/4502/3105/84166	10	6
GO:0019884	antigen processing and presentation of exogenous antigen	3.36766e-07	0.000526029	14/186	153/10877	0.000493274	8943/10540/3122/653361/5698/3120/9632/3111/3136/2923/567/5720/1778/3105	14	6
GO:0043312	neutrophil degranulation	1.23444e-06	0.000752264	21/186	368/10877	0.000705422	3482/718/80331/1650/427/1116/2760/51816/64114/3689/3136/6793/79888/2821/567/1778/1508/226/2512/3916/23191	21	6
GO:0002283	neutrophil activation involved in immune response	1.28962e-06	0.000752264	21/186	369/10877	0.000705422	3482/718/80331/1650/427/1116/2760/51816/64114/3689/3136/6793/79888/2821/567/1778/1508/226/2512/3916/23191	21	6
GO:0002478	antigen processing and presentation of exogenous peptide antigen	1.43165e-06	0.000752264	13/186	148/10877	0.000705422	10540/3122/653361/5698/3120/9632/3111/3136/2923/567/5720/1778/3105	13	6
GO:0042119	neutrophil activation	1.74354e-06	0.000752264	21/186	376/10877	0.000705422	3482/718/80331/1650/427/1116/2760/51816/64114/3689/3136/6793/79888/2821/567/1778/1508/226/2512/3916/23191	21	6
GO:0002446	neutrophil mediated immunity	2.06424e-06	0.000752264	21/186	380/10877	0.000705422	3482/718/80331/1650/427/1116/2760/51816/64114/3689/3136/6793/79888/2821/567/1778/1508/226/2512/3916/23191	21	6
GO:0036230	granulocyte activation	2.15241e-06	0.000752264	21/186	381/10877	0.000705422	3482/718/80331/1650/427/1116/2760/51816/64114/3689/3136/6793/79888/2821/567/1778/1508/226/2512/3916/23191	21	6
GO:0048002	antigen processing and presentation of peptide antigen	2.24308e-06	0.000752264	13/186	154/10877	0.000705422	10540/3122/653361/5698/3120/9632/3111/3136/2923/567/5720/1778/3105	13	6
GO:0019882	antigen processing and presentation	2.40802e-06	0.000752264	14/186	180/10877	0.000705422	8943/10540/3122/653361/5698/3120/9632/3111/3136/2923/567/5720/1778/3105	14	6
GO:0043299	leukocyte degranulation	5.83822e-06	0.00163998	21/186	406/10877	0.00153786	3482/718/80331/1650/427/1116/2760/51816/64114/3689/3136/6793/79888/2821/567/1778/1508/226/2512/3916/23191	21	6
GO:0002275	myeloid cell activation involved in immune response	6.29952e-06	0.00163998	21/186	408/10877	0.00153786	3482/718/80331/1650/427/1116/2760/51816/64114/3689/3136/6793/79888/2821/567/1778/1508/226/2512/3916/23191	21	6
GO:0002444	myeloid leukocyte mediated immunity	8.18646e-06	0.00196727	21/186	415/10877	0.00184477	3482/718/80331/1650/427/1116/2760/51816/64114/3689/3136/6793/79888/2821/567/1778/1508/226/2512/3916/23191	21	6
GO:0002274	myeloid leukocyte activation	1.42349e-05	0.00317642	22/186	465/10877	0.00297863	3482/718/80331/1650/7040/427/1116/2760/51816/64114/3689/3136/6793/79888/2821/567/1778/1508/226/2512/3916/23191	22	6
GO:0071346	cellular response to interferon-gamma	3.56184e-05	0.00741812	10/186	119/10877	0.0069562	3122/2634/83666/3120/3136/567/2633/4502/3105/84166	10	6
GO:0060627	regulation of vesicle-mediated transport	5.26643e-05	0.0102827	18/186	365/10877	0.00964242	718/3996/7040/392/3673/3689/567/10960/51272/2901/23086/2332/27445/9146/3916/4035/55633/717	18	6
GO:0002474	antigen processing and presentation of peptide antigen via MHC class I	6.97064e-05	0.0128096	8/186	81/10877	0.012012	653361/5698/9632/3136/2923/567/5720/3105	8	6
GO:0006909	phagocytosis	8.20181e-05	0.0141343	12/186	186/10877	0.0132542	4627/7052/718/63916/7040/3673/3689/10960/19/4035/23191/717	12	6
GO:0002697	regulation of immune effector process	8.59641e-05	0.0141343	14/186	247/10877	0.0132542	83666/718/151636/7009/7040/3689/2821/567/3718/114836/3600/715/3916/717	14	6
GO:0034341	response to interferon-gamma	9.78728e-05	0.0152877	10/186	134/10877	0.0143358	3122/2634/83666/3120/3136/567/2633/4502/3105/84166	10	6
GO:0002479	antigen processing and presentation of exogenous peptide antigen via MHC class I, TAP-dependent	0.000115108	0.0171237	7/186	65/10877	0.0160575	653361/5698/3136/2923/567/5720/3105	7	6
GO:0046686	response to cadmium ion	0.0001383	0.0196385	6/186	47/10877	0.0184157	653361/4864/2821/567/4493/4502	6	6
GO:0002576	platelet degranulation	0.000152527	0.0199841	9/186	115/10877	0.0187397	5196/66005/7040/7076/2316/226/2157/1893/10257	9	6
GO:0042590	antigen processing and presentation of exogenous peptide antigen via MHC class I	0.000153527	0.0199841	7/186	68/10877	0.0187397	653361/5698/3136/2923/567/5720/3105	7	6
GO:0031349	positive regulation of defense response	0.000328822	0.0410895	15/186	315/10877	0.038531	7052/83666/718/5698/7040/3673/4064/3689/81030/5720/114836/1508/3600/3916/84166	15	6
Gene set 4	GSE7313_SALMONELLA_TYPHIMURIUM_INFECTED_VS_UNINFECTED_48HPI_MESENTERIAL_LYMPH_NODE_DN								4
ID	Description	pvalue	p.adjust	GeneRatio	BgRatio	qvalue	geneID	Count	5
Gene set 5	GSE7313_SALMONELLA_TYPHIMURIUM_INFECTED_VS_UNINFECTED_21DPI_MESENTERIAL_LYMPH_NODE_UP								1
ID	Description	pvalue	p.adjust	GeneRatio	BgRatio	qvalue	geneID	Count	2
GO:0016570	histone modification	2.06962e-05	0.0449392	19/187	371/10877	0.0425239	54880/1786/8295/3054/7468/7874/6314/57634/1387/23522/8648/171023/11240/29128/23338/58508/55818/51366/604	19	3
GO:0016569	covalent chromatin modification	2.88349e-05	0.0449392	19/187	380/10877	0.0425239	54880/1786/8295/3054/7468/7874/6314/57634/1387/23522/8648/171023/11240/29128/23338/58508/55818/51366/604	19	3
Gene set 6	GSE7313_SALMONELLA_TYPHIMURIUM_INFECTED_VS_UNINFECTED_21DPI_MESENTERIAL_LYMPH_NODE_DN								1
ID	Description	pvalue	p.adjust	GeneRatio	BgRatio	qvalue	geneID	Count	2
Gene set 7	GSE7314_SALMONELLA_CHOLERAESUIS_INFECTED_VS_UNINFECTED_48HPI_MESENTERIAL_LYMPH_NODE_UP								4
ID	Description	pvalue	p.adjust	GeneRatio	BgRatio	qvalue	geneID	Count	5
GO:0006457	protein folding	5.83543e-12	2.02606e-08	22/189	203/10877	1.7967e-08	51726/23193/79139/7184/5479/59345/11140/10574/9601/7314/23184/5481/3309/3336/80273/64215/7203/3315/10910/10105/23071/2288	22	6
GO:0035966	response to topologically incorrect protein	6.78392e-11	1.17769e-07	19/189	166/10877	1.04437e-07	7057/51726/7009/9114/79139/7184/55161/2673/4189/6388/3309/10018/3336/6347/3315/10013/5611/23071/7873	19	6
GO:0006986	response to unfolded protein	7.54641e-10	8.73371e-07	17/189	149/10877	7.745e-07	7057/51726/7009/9114/79139/7184/55161/2673/4189/3309/10018/3336/6347/3315/5611/23071/7873	17	6
GO:0034976	response to endoplasmic reticulum stress	8.3741e-08	6.53774e-05	18/189	228/10877	5.79762e-05	7057/51726/7009/9114/79139/7184/55161/11253/9601/2673/4189/6388/3309/10018/6347/5611/10134/23071	18	6
GO:0035967	cellular response to topologically incorrect protein	9.41494e-08	6.53774e-05	14/189	136/10877	5.79762e-05	51726/7009/9114/79139/7184/55161/2673/4189/6388/3309/10018/6347/10013/5611	14	6
GO:0030968	endoplasmic reticulum unfolded protein response	2.82883e-07	0.000163695	12/189	106/10877	0.000145164	51726/7009/9114/79139/7184/55161/2673/4189/3309/10018/6347/5611	12	6
GO:1903894	regulation of IRE1-mediated unfolded protein response	3.5284e-07	0.000175008	5/189	10/10877	0.000155196	7009/55161/4189/3309/10018	5	6
GO:0036498	IRE1-mediated unfolded protein response	8.21832e-07	0.000356675	9/189	60/10877	0.000316297	51726/7009/9114/55161/2673/4189/3309/10018/5611	9	6
GO:0034620	cellular response to unfolded protein	1.19896e-06	0.000462533	12/189	121/10877	0.000410171	51726/7009/9114/79139/7184/55161/2673/4189/3309/10018/6347/5611	12	6
GO:0061077	chaperone-mediated protein folding	1.88113e-06	0.000653128	9/189	66/10877	0.00057919	5479/10574/9601/5481/3309/3336/7203/3315/2288	9	6
GO:0060333	interferon-gamma-mediated signaling pathway	2.14079e-06	0.00067571	9/189	67/10877	0.000599216	11140/2634/960/2633/4261/84166/3107/8651/7376	9	6
GO:0070266	necroptotic process	6.96665e-06	0.00201568	6/189	28/10877	0.00178749	7099/8531/7314/23643/11035/10105	6	6
GO:0097300	programmed necrotic cell death	1.58159e-05	0.00422407	6/189	32/10877	0.00374588	7099/8531/7314/23643/11035/10105	6	6
GO:0034341	response to interferon-gamma	2.09016e-05	0.00518359	11/189	134/10877	0.00459678	11140/2634/960/10537/6347/2633/4261/84166/3107/8651/7376	11	6
GO:1900101	regulation of endoplasmic reticulum unfolded protein response	2.43834e-05	0.00564395	5/189	21/10877	0.00500502	7009/55161/4189/3309/10018	5	6
GO:0071346	cellular response to interferon-gamma	4.08285e-05	0.00885978	10/189	119/10877	0.00785679	11140/2634/960/6347/2633/4261/84166/3107/8651/7376	10	6
GO:0070265	necrotic cell death	5.14712e-05	0.0105122	6/189	39/10877	0.00932219	7099/8531/7314/23643/11035/10105	6	6
GO:1905897	regulation of response to endoplasmic reticulum stress	8.45018e-05	0.0162995	7/189	61/10877	0.0144543	7009/55161/4189/3309/10018/5611/10134	7	6
GO:0007259	JAK-STAT cascade	0.000131257	0.0236111	9/189	111/10877	0.0209381	4851/51094/6347/1545/9306/6774/6776/8651/3454	9	6
GO:0097696	STAT cascade	0.000140618	0.0236111	9/189	112/10877	0.0209381	4851/51094/6347/1545/9306/6774/6776/8651/3454	9	6
GO:0002683	negative regulation of immune system process	0.000142809	0.0236111	15/189	287/10877	0.0209381	604/7057/7009/7099/2207/7105/4851/6347/2633/23643/710/9306/3949/84166/7376	15	6
Gene set 8	GSE7314_SALMONELLA_CHOLERAESUIS_INFECTED_VS_UNINFECTED_48HPI_MESENTERIAL_LYMPH_NODE_DN								4
ID	Description	pvalue	p.adjust	GeneRatio	BgRatio	qvalue	geneID	Count	5
Gene set 9	GSE7314_SALMONELLA_CHOLERAESUIS_INFECTED_VS_UNINFECTED_21DPI_MESENTERIAL_LYMPH_NODE_UP								1
ID	Description	pvalue	p.adjust	GeneRatio	BgRatio	qvalue	geneID	Count	2
GO:0030198	extracellular matrix organization	3.80573e-06	0.007022	17/190	265/10877	0.00670337	1281/4811/7373/3936/1545/10630/3680/7046/3688/50848/1513/25890/5054/351/90102/10653/84171	17	3
GO:0002576	platelet degranulation	5.06821e-06	0.007022	11/190	115/10877	0.00670337	5660/6812/5919/5054/94121/7424/1675/928/22915/351/967	11	3
GO:0050900	leukocyte migration	8.32545e-06	0.00768994	17/190	281/10877	0.00734101	481/6383/3680/5919/140885/7010/3688/196527/50848/5054/7424/1910/7525/58191/351/1234/57402	17	3
GO:0043062	extracellular structure organization	2.62921e-05	0.0182139	17/190	307/10877	0.0173874	1281/4811/7373/3936/1545/10630/3680/7046/3688/50848/1513/25890/5054/351/90102/10653/84171	17	3
GO:0043312	neutrophil degranulation	7.73311e-05	0.0277524	18/190	368/10877	0.0264931	5660/25840/140885/10577/427/6282/196527/2512/9522/820/10857/1675/55860/51816/3916/10875/967/22931	18	3
GO:0002283	neutrophil activation involved in immune response	8.00642e-05	0.0277524	18/190	369/10877	0.0264931	5660/25840/140885/10577/427/6282/196527/2512/9522/820/10857/1675/55860/51816/3916/10875/967/22931	18	3
GO:0043299	leukocyte degranulation	8.76701e-05	0.0277524	19/190	406/10877	0.0264931	5660/25840/6812/140885/10577/427/6282/196527/2512/9522/820/10857/1675/55860/51816/3916/10875/967/22931	19	3
GO:0002275	myeloid cell activation involved in immune response	9.35523e-05	0.0277524	19/190	408/10877	0.0264931	5660/25840/6812/140885/10577/427/6282/196527/2512/9522/820/10857/1675/55860/51816/3916/10875/967/22931	19	3
GO:0042119	neutrophil activation	0.000101709	0.0277524	18/190	376/10877	0.0264931	5660/25840/140885/10577/427/6282/196527/2512/9522/820/10857/1675/55860/51816/3916/10875/967/22931	18	3
GO:0002446	neutrophil mediated immunity	0.000116269	0.0277524	18/190	380/10877	0.0264931	5660/25840/140885/10577/427/6282/196527/2512/9522/820/10857/1675/55860/51816/3916/10875/967/22931	18	3
GO:0002444	myeloid leukocyte mediated immunity	0.000116988	0.0277524	19/190	415/10877	0.0264931	5660/25840/6812/140885/10577/427/6282/196527/2512/9522/820/10857/1675/55860/51816/3916/10875/967/22931	19	3
GO:0036230	granulocyte activation	0.000120184	0.0277524	18/190	381/10877	0.0264931	5660/25840/140885/10577/427/6282/196527/2512/9522/820/10857/1675/55860/51816/3916/10875/967/22931	18	3
GO:0002274	myeloid leukocyte activation	0.000179045	0.0381642	20/190	465/10877	0.0364325	5660/25840/6812/140885/10577/427/6282/196527/2512/9522/820/10857/1675/55860/351/51816/3916/10875/967/22931	20	3
Gene set 10	GSE7314_SALMONELLA_CHOLERAESUIS_INFECTED_VS_UNINFECTED_21DPI_MESENTERIAL_LYMPH_NODE_DN								1
ID	Description	pvalue	p.adjust	GeneRatio	BgRatio	qvalue	geneID	Count	2
GO:0006281	DNA repair	8.78111e-06	0.0208727	20/183	390/10877	0.0205293	5985/10111/1017/5424/5441/3148/85015/57599/2956/64708/3159/10450/11073/1032/54465/8533/7508/27301/5886/51514	20	3
GO:0006289	nucleotide-excision repair	1.94109e-05	0.0230699	9/183	90/10877	0.0226903	5985/5424/5441/85015/64708/10450/8533/7508/5886	9	3
GO:0022613	ribonucleoprotein complex biogenesis	4.3028e-05	0.0340926	19/183	400/10877	0.0335317	2794/25804/51042/65083/3326/1656/55720/92345/23195/6880/27340/23378/4839/6130/80153/27161/6155/79050/57647	19	3
Gene set 11	GSE8974_YOUNG_VS_SENESCENT_ENDOTHELIAL_CELLS_UP								4
ID	Description	pvalue	p.adjust	GeneRatio	BgRatio	qvalue	geneID	Count	5
GO:0034340	response to type I interferon	3.76182e-11	1.05368e-07	13/181	65/10877	1.01213e-07	8772/84166/2634/4599/3430/2537/3434/55337/3659/4938/8519/3437/9636	13	6
GO:0060337	type I interferon signaling pathway	2.68027e-10	2.50248e-07	12/181	61/10877	2.40378e-07	8772/84166/2634/4599/3430/2537/3434/3659/4938/8519/3437/9636	12	6
GO:0071357	cellular response to type I interferon	2.68027e-10	2.50248e-07	12/181	61/10877	2.40378e-07	8772/84166/2634/4599/3430/2537/3434/3659/4938/8519/3437/9636	12	6
GO:0048525	negative regulation of viral process	3.31901e-08	2.32414e-05	10/181	58/10877	2.23247e-05	3065/4599/3434/5371/55337/6737/4938/8519/9636/7726	10	6
GO:0034341	response to interferon-gamma	4.52686e-08	2.53595e-05	14/181	134/10877	2.43593e-05	3965/7791/84166/567/2634/10437/5371/55337/3659/6737/4938/8519/6347/7726	14	6
GO:0051607	defense response to virus	6.00455e-08	2.80312e-05	14/181	137/10877	2.69256e-05	8772/330/84166/4599/3434/5371/55337/3659/4938/9255/8519/23586/3437/9636	14	6
GO:1903901	negative regulation of viral life cycle	9.28984e-08	3.71726e-05	9/181	49/10877	3.57065e-05	4599/3434/5371/55337/6737/4938/8519/9636/7726	9	6
GO:0071346	cellular response to interferon-gamma	6.3138e-07	0.000221062	12/181	119/10877	0.000212343	3965/7791/84166/567/2634/10437/5371/3659/6737/4938/6347/7726	12	6
GO:0060333	interferon-gamma-mediated signaling pathway	1.49476e-06	0.000465202	9/181	67/10877	0.000446854	84166/567/2634/10437/5371/3659/6737/4938/7726	9	6
GO:0009615	response to virus	1.69009e-06	0.000473393	15/181	206/10877	0.000454722	8772/3965/330/84166/4599/3434/5371/55337/3659/4938/9255/8519/23586/3437/9636	15	6
GO:0043901	negative regulation of multi-organism process	2.44127e-06	0.000621637	11/181	112/10877	0.000597119	3065/4599/3434/5371/55337/7076/6737/4938/8519/9636/7726	11	6
GO:1903900	regulation of viral life cycle	7.20263e-06	0.00168121	10/181	102/10877	0.00161491	3965/4599/3434/5371/55337/6737/4938/8519/9636/7726	10	6
GO:0045071	negative regulation of viral genome replication	1.23599e-05	0.00266309	6/181	32/10877	0.00255806	4599/3434/55337/4938/8519/9636	6	6
GO:0098542	defense response to other organism	3.24188e-05	0.00648608	15/181	263/10877	0.00623026	8772/57402/330/84166/4599/3434/5371/55337/3659/4938/9255/8519/23586/3437/9636	15	6
GO:0050792	regulation of viral process	4.52804e-05	0.00845535	11/181	152/10877	0.00812187	3965/3065/4599/3434/5371/55337/6737/4938/8519/9636/7726	11	6
GO:0043903	regulation of symbiosis, encompassing mutualism through parasitism	0.000161123	0.0282066	11/181	175/10877	0.0270941	3965/3065/4599/3434/5371/55337/6737/4938/8519/9636/7726	11	6
Gene set 12	GSE8974_YOUNG_VS_SENESCENT_ENDOTHELIAL_CELLS_DN								4
ID	Description	pvalue	p.adjust	GeneRatio	BgRatio	qvalue	geneID	Count	5
GO:0051301	cell division	4.93988e-23	1.3555e-19	47/188	482/10877	1.28489e-19	9055/9133/90417/24137/699/29127/7251/54069/1063/7443/11113/7153/9493/891/10112/3832/11065/26586/8556/1163/22974/54478/84722/983/1062/701/259266/51203/57144/4904/11339/83461/3925/9918/26524/890/219771/203523/85458/220134/147841/332/9212/83540/54892/4085/11252	47	6
GO:0007059	chromosome segregation	4.88134e-18	6.6972e-15	32/188	274/10877	6.34831e-15	9055/90417/24137/699/29127/54069/1063/84690/10744/7153/9493/891/3832/11065/8556/84722/55839/1062/701/51203/55755/9787/11339/9918/220134/147841/332/9212/83540/130951/4085/1325	32	6
GO:0098813	nuclear chromosome segregation	4.10645e-17	3.75603e-14	29/188	234/10877	3.56037e-14	9055/90417/24137/699/29127/1063/84690/10744/7153/9493/891/11065/8556/84722/55839/1062/701/51203/55755/9787/9918/220134/147841/332/9212/83540/130951/4085/1325	29	6
GO:0000819	sister chromatid segregation	2.52017e-16	1.72884e-13	26/188	193/10877	1.63878e-13	9055/90417/24137/699/29127/1063/10744/7153/9493/891/11065/8556/84722/55839/1062/701/51203/55755/9787/9918/220134/147841/332/9212/83540/4085	26	6
GO:0000070	mitotic sister chromatid segregation	4.63037e-15	2.40285e-12	21/188	129/10877	2.27768e-12	9055/90417/24137/699/29127/1063/10744/9493/891/11065/8556/84722/1062/701/51203/55755/9787/9918/9212/83540/4085	21	6
GO:0000280	nuclear division	5.25405e-15	2.40285e-12	30/188	302/10877	2.27768e-12	9055/90417/24137/699/29127/1063/84690/10744/7153/9493/891/3832/11065/8556/22974/84722/1062/701/259266/51203/55755/9787/9918/332/9212/83540/130951/940/4085/1325	30	6
GO:0140014	mitotic nuclear division	4.46879e-14	1.75177e-11	25/188	218/10877	1.66051e-11	9055/90417/24137/699/29127/1063/10744/9493/891/3832/11065/8556/22974/84722/1062/701/51203/55755/9787/9918/332/9212/83540/940/4085	25	6
GO:0044772	mitotic cell cycle phase transition	7.40229e-14	2.39478e-11	34/188	433/10877	2.27002e-11	1033/5116/9133/11073/699/6500/1063/11113/3161/891/11065/2273/8556/1163/22974/1869/1029/983/1062/701/1719/55755/6118/9787/8453/26524/890/219771/8318/9212/128239/10733/4085/29117	34	6
GO:0048285	organelle fission	7.85459e-14	2.39478e-11	30/188	334/10877	2.27002e-11	9055/90417/24137/699/29127/1063/84690/10744/7153/9493/891/3832/11065/8556/22974/84722/1062/701/259266/51203/55755/9787/9918/332/9212/83540/130951/940/4085/1325	30	6
GO:1902850	microtubule cytoskeleton organization involved in mitosis	1.52006e-13	4.17105e-11	18/188	104/10877	3.95377e-11	9055/5116/24137/29127/9493/891/3832/8556/22974/84722/1062/51203/55755/3925/6491/332/9212/83540	18	6
GO:0044770	cell cycle phase transition	4.25739e-13	1.06203e-10	34/188	460/10877	1.0067e-10	1033/5116/9133/11073/699/6500/1063/11113/3161/891/11065/2273/8556/1163/22974/1869/1029/983/1062/701/1719/55755/6118/9787/8453/26524/890/219771/8318/9212/128239/10733/4085/29117	34	6
GO:0007052	mitotic spindle organization	2.80568e-12	6.41565e-10	16/188	91/10877	6.08143e-10	9055/5116/24137/29127/9493/891/3832/8556/22974/84722/1062/3925/6491/332/9212/83540	16	6
GO:0051304	chromosome separation	3.68804e-12	7.7846e-10	14/188	65/10877	7.37907e-10	699/1063/10744/7153/891/11065/1062/701/55755/9787/9918/130951/4085/1325	14	6
GO:0007051	spindle organization	1.17659e-11	2.30612e-09	18/188	133/10877	2.18598e-09	9055/5116/90417/24137/29127/9493/891/3832/8556/22974/84722/1062/259266/3925/6491/332/9212/83540	18	6
GO:0000226	microtubule cytoskeleton organization	5.70749e-11	1.04409e-08	28/188	377/10877	9.89698e-09	9055/5116/90417/24137/29127/9493/891/10112/3832/26586/8556/22974/84722/983/1062/259266/51203/55755/27436/3925/6491/23271/85458/220134/332/9212/83540/10733	28	6
GO:1901990	regulation of mitotic cell cycle phase transition	9.75623e-10	1.67319e-07	24/188	316/10877	1.58603e-07	5116/11073/699/6500/1063/3161/891/11065/2273/8556/22974/1869/1029/983/1062/701/55755/6118/9787/8318/9212/10733/4085/29117	24	6
GO:0051983	regulation of chromosome segregation	2.02042e-09	3.2612e-07	13/188	85/10877	3.09131e-07	90417/699/29127/1063/10744/891/11065/1062/701/55755/9787/9212/4085	13	6
GO:1901987	regulation of cell cycle phase transition	3.98068e-09	6.06833e-07	24/188	339/10877	5.7522e-07	5116/11073/699/6500/1063/3161/891/11065/2273/8556/22974/1869/1029/983/1062/701/55755/6118/9787/8318/9212/10733/4085/29117	24	6
GO:0010965	regulation of mitotic sister chromatid separation	4.45073e-09	6.42779e-07	10/188	46/10877	6.09294e-07	699/1063/10744/891/11065/1062/701/55755/9787/4085	10	6
GO:0000022	mitotic spindle elongation	4.8822e-09	6.69838e-07	6/188	10/10877	6.34943e-07	9055/24137/29127/9493/8556/9212	6	6
GO:0051306	mitotic sister chromatid separation	6.93069e-09	9.0561e-07	10/188	48/10877	8.58433e-07	699/1063/10744/891/11065/1062/701/55755/9787/4085	10	6
GO:1905818	regulation of chromosome separation	8.57836e-09	1.06996e-06	10/188	49/10877	1.01422e-06	699/1063/10744/891/11065/1062/701/55755/9787/4085	10	6
GO:0051231	spindle elongation	1.05869e-08	1.26306e-06	6/188	11/10877	1.19726e-06	9055/24137/29127/9493/8556/9212	6	6
GO:0030071	regulation of mitotic metaphase/anaphase transition	3.0994e-08	3.4019e-06	9/188	42/10877	3.22468e-06	699/1063/891/11065/1062/701/55755/9787/4085	9	6
GO:1902099	regulation of metaphase/anaphase transition of cell cycle	3.0994e-08	3.4019e-06	9/188	42/10877	3.22468e-06	699/1063/891/11065/1062/701/55755/9787/4085	9	6
GO:0033047	regulation of mitotic sister chromatid segregation	3.99893e-08	4.13334e-06	10/188	57/10877	3.91802e-06	699/1063/10744/891/11065/1062/701/55755/9787/4085	10	6
GO:0007088	regulation of mitotic nuclear division	4.06707e-08	4.13334e-06	14/188	128/10877	3.91802e-06	699/1063/10744/891/3832/11065/8556/1062/701/51203/55755/9787/940/4085	14	6
GO:0007091	metaphase/anaphase transition of mitotic cell cycle	5.89052e-08	5.57365e-06	9/188	45/10877	5.2833e-06	699/1063/891/11065/1062/701/55755/9787/4085	9	6
GO:0044784	metaphase/anaphase transition of cell cycle	5.89052e-08	5.57365e-06	9/188	45/10877	5.2833e-06	699/1063/891/11065/1062/701/55755/9787/4085	9	6
GO:0045786	negative regulation of cell cycle	6.1401e-08	5.61615e-06	27/188	483/10877	5.32358e-06	1033/5781/27429/11073/699/7251/6500/1063/10744/7153/23512/891/2273/8556/1869/1029/983/701/55755/648/6118/8453/26524/8318/9212/4085/29117	27	6
GO:0033045	regulation of sister chromatid segregation	1.4707e-07	1.30181e-05	10/188	65/10877	1.23399e-05	699/1063/10744/891/11065/1062/701/55755/9787/4085	10	6
GO:0051783	regulation of nuclear division	1.80882e-07	1.55107e-05	14/188	144/10877	1.47026e-05	699/1063/10744/891/3832/11065/8556/1062/701/51203/55755/9787/940/4085	14	6
GO:1905819	negative regulation of chromosome separation	2.73171e-07	2.20465e-05	7/188	27/10877	2.0898e-05	699/1063/10744/891/701/55755/4085	7	6
GO:2000816	negative regulation of mitotic sister chromatid separation	2.73171e-07	2.20465e-05	7/188	27/10877	2.0898e-05	699/1063/10744/891/701/55755/4085	7	6
GO:0000086	G2/M transition of mitotic cell cycle	2.86814e-07	2.24862e-05	16/188	197/10877	2.13148e-05	5116/9133/11073/6500/1063/11113/3161/891/2273/22974/983/55755/890/219771/9212/10733	16	6
GO:0031577	spindle checkpoint	3.58938e-07	2.73591e-05	7/188	28/10877	2.59338e-05	699/1063/891/701/55755/9212/4085	7	6
GO:0033048	negative regulation of mitotic sister chromatid segregation	5.99356e-07	4.44495e-05	7/188	30/10877	4.21339e-05	699/1063/10744/891/701/55755/4085	7	6
GO:0045930	negative regulation of mitotic cell cycle	7.9493e-07	5.74023e-05	17/188	239/10877	5.44119e-05	11073/699/6500/1063/10744/7153/891/2273/8556/1869/983/701/55755/6118/9212/4085/29117	17	6
GO:0044839	cell cycle G2/M phase transition	8.2474e-07	5.80279e-05	16/188	213/10877	5.50049e-05	5116/9133/11073/6500/1063/11113/3161/891/2273/22974/983/55755/890/219771/9212/10733	16	6
GO:0006323	DNA packaging	9.46933e-07	6.28753e-05	12/188	119/10877	5.95998e-05	54069/7153/891/1029/983/55839/51203/11339/9918/130951/54892/55723	12	6
GO:0033046	negative regulation of sister chromatid segregation	9.62377e-07	6.28753e-05	7/188	32/10877	5.95998e-05	699/1063/10744/891/701/55755/4085	7	6
GO:0051985	negative regulation of chromosome segregation	9.62377e-07	6.28753e-05	7/188	32/10877	5.95998e-05	699/1063/10744/891/701/55755/4085	7	6
GO:0061640	cytoskeleton-dependent cytokinesis	1.04705e-06	6.68164e-05	9/188	62/10877	6.33357e-05	24137/29127/11113/9493/10112/26586/51203/3925/9212	9	6
GO:0007093	mitotic cell cycle checkpoint	1.74892e-06	0.000109069	12/188	126/10877	0.000103387	11073/699/1063/7153/891/1869/983/701/55755/6118/9212/4085	12	6
GO:0000075	cell cycle checkpoint	1.9562e-06	0.000119285	14/188	175/10877	0.000113071	5781/11073/699/1063/7153/891/1869/983/701/55755/6118/8318/9212/4085	14	6
GO:0045787	positive regulation of cell cycle	2.0889e-06	0.000124607	18/188	285/10877	0.000118116	5781/29127/11113/9493/891/11065/1163/1869/84722/983/51203/9787/219771/8318/9212/940/10733/4085	18	6
GO:1901991	negative regulation of mitotic cell cycle phase transition	2.23924e-06	0.000128406	14/188	177/10877	0.000121717	11073/699/6500/1063/891/2273/1869/983/701/55755/6118/9212/4085/29117	14	6
GO:0000910	cytokinesis	2.24618e-06	0.000128406	12/188	129/10877	0.000121717	9055/24137/29127/11113/9493/10112/26586/51203/57144/3925/9212/11252	12	6
GO:0090307	mitotic spindle assembly	2.69508e-06	0.00014821	8/188	52/10877	0.000140489	24137/29127/9493/3832/8556/22974/332/9212	8	6
GO:0007062	sister chromatid cohesion	2.70062e-06	0.00014821	11/188	109/10877	0.000140489	699/1063/55839/1062/701/220134/147841/332/9212/83540/4085	11	6
GO:0010948	negative regulation of cell cycle process	2.82281e-06	0.000151878	17/188	262/10877	0.000143966	11073/699/6500/1063/10744/23512/891/2273/1869/983/701/55755/648/6118/9212/4085/29117	17	6
GO:0000281	mitotic cytokinesis	3.12772e-06	0.000161933	8/188	53/10877	0.000153497	24137/29127/11113/9493/10112/26586/51203/3925	8	6
GO:0045132	meiotic chromosome segregation	3.12772e-06	0.000161933	8/188	53/10877	0.000153497	699/84690/10744/7153/701/83540/130951/1325	8	6
GO:0007094	mitotic spindle assembly checkpoint	3.3166e-06	0.000162514	6/188	25/10877	0.000154048	699/1063/891/701/55755/4085	6	6
GO:0071173	spindle assembly checkpoint	3.3166e-06	0.000162514	6/188	25/10877	0.000154048	699/1063/891/701/55755/4085	6	6
GO:0071174	mitotic spindle checkpoint	3.3166e-06	0.000162514	6/188	25/10877	0.000154048	699/1063/891/701/55755/4085	6	6
GO:0071103	DNA conformation change	3.77275e-06	0.000181622	14/188	185/10877	0.00017216	54069/7153/891/1029/983/55839/51203/11339/9918/8318/3146/130951/54892/55723	14	6
GO:0045839	negative regulation of mitotic nuclear division	3.97025e-06	0.000187834	7/188	39/10877	0.000178049	699/1063/10744/891/701/55755/4085	7	6
GO:0045841	negative regulation of mitotic metaphase/anaphase transition	4.24999e-06	0.000194366	6/188	26/10877	0.000184241	699/1063/891/701/55755/4085	6	6
GO:1902100	negative regulation of metaphase/anaphase transition of cell cycle	4.24999e-06	0.000194366	6/188	26/10877	0.000184241	699/1063/891/701/55755/4085	6	6
GO:1901988	negative regulation of cell cycle phase transition	5.15197e-06	0.000231754	14/188	190/10877	0.000219681	11073/699/6500/1063/891/2273/1869/983/701/55755/6118/9212/4085/29117	14	6
GO:0030261	chromosome condensation	5.38622e-06	0.000238384	6/188	27/10877	0.000225965	7153/891/983/51203/9918/54892	6	6
GO:0008608	attachment of spindle microtubules to kinetochore	8.39843e-06	0.000365798	6/188	29/10877	0.000346742	90417/29127/891/1062/9212/83540	6	6
GO:0051784	negative regulation of nuclear division	1.07317e-05	0.000460123	7/188	45/10877	0.000436153	699/1063/10744/891/701/55755/4085	7	6
GO:0051225	spindle assembly	1.1237e-05	0.000474375	9/188	82/10877	0.000449663	24137/29127/9493/3832/8556/22974/259266/332/9212	9	6
GO:0070507	regulation of microtubule cytoskeleton organization	1.38746e-05	0.000576848	11/188	129/10877	0.000546797	3832/26586/22974/84722/55755/3925/6491/23271/85458/220134/10733	11	6
GO:0044843	cell cycle G1/S phase transition	1.80595e-05	0.000727209	14/188	212/10877	0.000689325	1033/891/2273/1869/1029/983/1719/6118/8453/26524/890/8318/128239/29117	14	6
GO:0090068	positive regulation of cell cycle process	1.80595e-05	0.000727209	14/188	212/10877	0.000689325	29127/11113/9493/891/11065/1869/983/51203/9787/8318/9212/940/10733/4085	14	6
GO:0010389	regulation of G2/M transition of mitotic cell cycle	1.82862e-05	0.000727209	12/188	158/10877	0.000689325	5116/11073/6500/1063/3161/891/2273/22974/983/55755/9212/10733	12	6
GO:0051321	meiotic cell cycle	2.075e-05	0.000813399	12/188	160/10877	0.000771026	699/84690/10744/7153/440822/983/701/259266/9918/83540/130951/1325	12	6
GO:1903046	meiotic cell cycle process	3.90238e-05	0.00150819	10/188	119/10877	0.00142962	699/84690/10744/7153/701/259266/9918/83540/130951/1325	10	6
GO:0033044	regulation of chromosome organization	4.41772e-05	0.00168364	15/188	260/10877	0.00159593	699/1063/10744/7153/891/11065/1062/701/55755/9787/8318/9646/9212/4085/29117	15	6
GO:0000082	G1/S transition of mitotic cell cycle	4.73836e-05	0.0017811	13/188	202/10877	0.00168832	1033/891/2273/1869/1029/983/1719/6118/8453/26524/8318/128239/29117	13	6
GO:1902749	regulation of cell cycle G2/M phase transition	5.03889e-05	0.00186847	12/188	175/10877	0.00177114	5116/11073/6500/1063/3161/891/2273/22974/983/55755/9212/10733	12	6
GO:0032886	regulation of microtubule-based process	5.66926e-05	0.00207419	11/188	150/10877	0.00196614	3832/26586/22974/84722/55755/3925/6491/23271/85458/220134/10733	11	6
GO:0140013	meiotic nuclear division	0.000102015	0.0036833	9/188	108/10877	0.00349142	699/84690/10744/7153/701/259266/83540/130951/1325	9	6
GO:0045931	positive regulation of mitotic cell cycle	0.000126068	0.00449261	9/188	111/10877	0.00425857	5781/891/11065/983/51203/9787/8318/940/4085	9	6
GO:0000079	regulation of cyclin-dependent protein serine/threonine kinase activity	0.000164044	0.00577099	7/188	68/10877	0.00547035	1033/891/1163/1029/84722/26524/219771	7	6
GO:0034508	centromere complex assembly	0.000172484	0.00599109	5/188	31/10877	0.00567899	54069/1063/55839/1062/11339	5	6
GO:1904029	regulation of cyclin-dependent protein kinase activity	0.000215447	0.00738984	7/188	71/10877	0.00700487	1033/891/1163/1029/84722/26524/219771	7	6
GO:0031110	regulation of microtubule polymerization or depolymerization	0.000232274	0.00786865	6/188	51/10877	0.00745873	26586/84722/55755/3925/23271/220134	6	6
GO:0010639	negative regulation of organelle organization	0.000235896	0.0078939	14/188	269/10877	0.00748267	27429/699/1063/10744/7153/891/5217/26586/701/55755/3925/23271/119/4085	14	6
GO:0016572	histone phosphorylation	0.000270857	0.00893091	5/188	34/10877	0.00846566	7443/891/983/890/9212	5	6
GO:0051383	kinetochore organization	0.000273395	0.00893091	4/188	19/10877	0.00846566	1063/55839/1062/83540	4	6
GO:2001251	negative regulation of chromosome organization	0.000307152	0.00991558	8/188	99/10877	0.00939903	699/1063/10744/7153/891/701/55755/4085	8	6
GO:0007077	mitotic nuclear envelope disassembly	0.000311612	0.00994259	5/188	35/10877	0.00942464	9133/7443/891/8086/983	5	6
GO:0051493	regulation of cytoskeleton organization	0.000322116	0.0101596	17/188	381/10877	0.00963035	7168/83700/2885/11113/3832/5217/26586/22974/84722/55755/3925/6491/23271/85458/220134/119/10733	17	6
GO:0030397	membrane disassembly	0.000462031	0.0142451	5/188	38/10877	0.013503	9133/7443/891/8086/983	5	6
GO:0051081	nuclear envelope disassembly	0.000462031	0.0142451	5/188	38/10877	0.013503	9133/7443/891/8086/983	5	6
GO:0032465	regulation of cytokinesis	0.000518385	0.0156313	6/188	59/10877	0.014817	9055/29127/11113/9493/10112/9212	6	6
GO:0051303	establishment of chromosome localization	0.000518385	0.0156313	6/188	59/10877	0.014817	1063/891/84722/1062/9787/83540	6	6
GO:0009162	deoxyribonucleoside monophosphate metabolic process	0.000557621	0.0164528	3/188	10/10877	0.0155957	1854/7083/6470	3	6
GO:0035404	histone-serine phosphorylation	0.000557621	0.0164528	3/188	10/10877	0.0155957	7443/891/9212	3	6
GO:0050000	chromosome localization	0.000567827	0.0165757	6/188	60/10877	0.0157122	1063/891/84722/1062/9787/83540	6	6
GO:0051302	regulation of cell division	0.00058875	0.0170056	8/188	109/10877	0.0161197	9055/29127/11113/9493/10112/259266/4904/9212	8	6
GO:0051307	meiotic chromosome separation	0.000757001	0.0216376	3/188	11/10877	0.0205104	7153/130951/1325	3	6
GO:0006261	DNA-dependent DNA replication	0.000940133	0.0265951	8/188	117/10877	0.0252096	10038/11073/8099/6118/92667/653/8318/1325	8	6
GO:0032467	positive regulation of cytokinesis	0.000959389	0.0268088	4/188	26/10877	0.0254122	29127/11113/9493/9212	4	6
GO:0009263	deoxyribonucleotide biosynthetic process	0.000996537	0.0268088	3/188	12/10877	0.0254122	1854/6240/6470	3	6
GO:0051988	regulation of attachment of spindle microtubules to kinetochore	0.000996537	0.0268088	3/188	12/10877	0.0254122	90417/29127/891	3	6
GO:0090266	regulation of mitotic cell cycle spindle assembly checkpoint	0.000996537	0.0268088	3/188	12/10877	0.0254122	891/55755/4085	3	6
GO:1903504	regulation of mitotic spindle checkpoint	0.000996537	0.0268088	3/188	12/10877	0.0254122	891/55755/4085	3	6
GO:0045737	positive regulation of cyclin-dependent protein serine/threonine kinase activity	0.00111117	0.0293177	4/188	27/10877	0.0277904	891/1163/84722/219771	4	6
GO:1901976	regulation of cell cycle checkpoint	0.00111117	0.0293177	4/188	27/10877	0.0277904	891/55755/6118/4085	4	6
GO:0051310	metaphase plate congression	0.00112858	0.0294936	5/188	46/10877	0.0279571	1063/891/84722/1062/83540	5	6
GO:2000045	regulation of G1/S transition of mitotic cell cycle	0.00123399	0.0319442	8/188	122/10877	0.0302801	891/2273/1869/1029/983/6118/8318/29117	8	6
GO:0090231	regulation of spindle checkpoint	0.00127909	0.032802	3/188	13/10877	0.0310932	891/55755/4085	3	6
GO:1904031	positive regulation of cyclin-dependent protein kinase activity	0.00146382	0.037192	4/188	29/10877	0.0352545	891/1163/84722/219771	4	6
GO:0034501	protein localization to kinetochore	0.00160732	0.0397342	3/188	14/10877	0.0376643	983/701/9212	3	6
GO:0046599	regulation of centriole replication	0.00160732	0.0397342	3/188	14/10877	0.0376643	55755/6491/10733	3	6
GO:0051382	kinetochore assembly	0.00160732	0.0397342	3/188	14/10877	0.0376643	1063/55839/1062	3	6
GO:0031109	microtubule polymerization or depolymerization	0.00172156	0.0418049	6/188	74/10877	0.0396271	26586/84722/55755/3925/23271/220134	6	6
GO:0031145	anaphase-promoting complex-dependent catabolic process	0.00172156	0.0418049	6/188	74/10877	0.0396271	891/11065/983/701/9212/4085	6	6
GO:0065004	protein-DNA complex assembly	0.00174671	0.0420436	9/188	159/10877	0.0398533	54069/1063/55839/1062/6118/11339/8318/3146/55723	9	6
GO:0006336	DNA replication-independent nucleosome assembly	0.00188779	0.0450442	4/188	31/10877	0.0426977	54069/55839/11339/55723	4	6
GO:0031570	DNA integrity checkpoint	0.00194411	0.0455953	8/188	131/10877	0.04322	5781/11073/7153/891/1869/983/6118/8318	8	6
GO:1902806	regulation of cell cycle G1/S phase transition	0.00194411	0.0455953	8/188	131/10877	0.04322	891/2273/1869/1029/983/6118/8318/29117	8	6
GO:1901992	positive regulation of mitotic cell cycle phase transition	0.00196852	0.0457763	5/188	52/10877	0.0433916	891/11065/983/9787/8318	5	6
GO:0031113	regulation of microtubule polymerization	0.00212867	0.0483955	4/188	32/10877	0.0458743	84722/55755/3925/23271	4	6
GO:0034724	DNA replication-independent nucleosome organization	0.00212867	0.0483955	4/188	32/10877	0.0458743	54069/55839/11339/55723	4	6
GO:0022411	cellular component disassembly	0.00213406	0.0483955	17/188	452/10877	0.0458743	9133/27429/7416/7251/7443/7153/55102/891/26586/8086/983/3925/23271/4811/56945/3146/119	17	6
Gene set 13	GSE12705_SPHERICAL_VS_TUBULAR_EMBRYONIC_TROPHOBLAST_ELONGATION_UP								1
ID	Description	pvalue	p.adjust	GeneRatio	BgRatio	qvalue	geneID	Count	2
Gene set 14	GSE12705_SPHERICAL_VS_TUBULAR_EMBRYONIC_TROPHOBLAST_ELONGATION_DN								1
ID	Description	pvalue	p.adjust	GeneRatio	BgRatio	qvalue	geneID	Count	2
GO:0007163	establishment or maintenance of cell polarity	1.16979e-05	0.0363102	12/181	157/10877	0.0339854	1495/55612/7474/390/55742/51421/7465/382/81565/154810/23150/58480	12	3
Gene set 15	GSE12705_TUBULAR_VS_EARLY_FILAMENTOUS_EMBRYONIC_TROPHOBLAST_ELONGATION_UP								4
ID	Description	pvalue	p.adjust	GeneRatio	BgRatio	qvalue	geneID	Count	5
GO:0034109	homotypic cell-cell adhesion	1.37557e-05	0.0112085	8/183	66/10877	0.0107237	5578/2621/1832/5592/7414/1192/1829/928	8	6
GO:0002934	desmosome organization	1.5045e-05	0.0112085	4/183	10/10877	0.0107237	5578/1832/64065/1829	4	6
GO:0008544	epidermis development	2.12548e-05	0.0112085	14/183	221/10877	0.0107237	27032/2810/5583/10555/1832/4644/5948/7357/84283/10427/7051/64065/1829/6768	14	6
GO:0036230	granulocyte activation	2.20596e-05	0.0112085	19/183	381/10877	0.0107237	2720/2760/1992/1476/10555/1512/6518/1832/10890/53917/6810/54472/196527/9342/7414/3482/2896/427/3074	19	6
GO:0031424	keratinization	2.72818e-05	0.0112085	7/183	53/10877	0.0107237	2810/1832/84283/7051/64065/1829/6768	7	6
GO:0006687	glycosphingolipid metabolic process	3.09043e-05	0.0112085	7/183	54/10877	0.0107237	57704/2720/57488/2760/7357/427/3074	7	6
GO:0070268	cornification	3.14846e-05	0.0112085	6/183	37/10877	0.0107237	1832/84283/7051/64065/1829/6768	6	6
GO:0043312	neutrophil degranulation	4.72522e-05	0.0127315	18/183	368/10877	0.0121808	2720/2760/1992/1476/10555/1512/6518/1832/10890/53917/54472/196527/9342/7414/3482/2896/427/3074	18	6
GO:0002283	neutrophil activation involved in immune response	4.89521e-05	0.0127315	18/183	369/10877	0.0121808	2720/2760/1992/1476/10555/1512/6518/1832/10890/53917/54472/196527/9342/7414/3482/2896/427/3074	18	6
GO:0043299	leukocyte degranulation	5.26291e-05	0.0127315	19/183	406/10877	0.0121808	2720/2760/1992/1476/10555/1512/6518/1832/10890/53917/6810/54472/196527/9342/7414/3482/2896/427/3074	19	6
GO:0002275	myeloid cell activation involved in immune response	5.6229e-05	0.0127315	19/183	408/10877	0.0121808	2720/2760/1992/1476/10555/1512/6518/1832/10890/53917/6810/54472/196527/9342/7414/3482/2896/427/3074	19	6
GO:0042119	neutrophil activation	6.24521e-05	0.0127315	18/183	376/10877	0.0121808	2720/2760/1992/1476/10555/1512/6518/1832/10890/53917/54472/196527/9342/7414/3482/2896/427/3074	18	6
GO:0002444	myeloid leukocyte mediated immunity	7.06171e-05	0.0127315	19/183	415/10877	0.0121808	2720/2760/1992/1476/10555/1512/6518/1832/10890/53917/6810/54472/196527/9342/7414/3482/2896/427/3074	19	6
GO:0002446	neutrophil mediated immunity	7.15661e-05	0.0127315	18/183	380/10877	0.0121808	2720/2760/1992/1476/10555/1512/6518/1832/10890/53917/54472/196527/9342/7414/3482/2896/427/3074	18	6
GO:0006672	ceramide metabolic process	7.6634e-05	0.0127315	7/183	62/10877	0.0121808	8879/57704/2760/7357/23659/427/3074	7	6
GO:0030149	sphingolipid catabolic process	9.15437e-05	0.0142579	4/183	15/10877	0.0136412	8879/57704/2760/3074	4	6
GO:0002274	myeloid leukocyte activation	0.000106958	0.0156789	20/183	465/10877	0.0150007	2720/2760/1992/1476/10555/1512/6518/1832/10890/53917/6810/54472/196527/9342/10397/7414/3482/2896/427/3074	20	6
GO:0070527	platelet aggregation	0.000179554	0.0248583	6/183	50/10877	0.023783	5578/2621/5592/7414/1192/928	6	6
GO:0046466	membrane lipid catabolic process	0.000197263	0.0258726	4/183	18/10877	0.0247535	8879/57704/2760/3074	4	6
GO:0006665	sphingolipid metabolic process	0.000211477	0.02635	9/183	122/10877	0.0252103	8879/57704/2720/57488/2760/7357/23659/427/3074	9	6
Gene set 16	GSE12705_TUBULAR_VS_EARLY_FILAMENTOUS_EMBRYONIC_TROPHOBLAST_ELONGATION_DN								4
ID	Description	pvalue	p.adjust	GeneRatio	BgRatio	qvalue	geneID	Count	5
GO:0044770	cell cycle phase transition	2.71097e-06	0.00626926	23/183	460/10877	0.00595115	5719/55215/7027/55795/4173/6659/57325/328/2146/1031/10270/6241/3624/4998/9212/586/701/8636/677/9793/672/5558/4221	23	6
GO:0042254	ribosome biogenesis	4.79118e-06	0.00626926	17/183	280/10877	0.00595115	51077/4809/23404/26574/55759/83732/54853/6894/115416/84864/9221/10969/54512/26156/26354/25983/55341	17	6
GO:0034660	ncRNA metabolic process	1.06031e-05	0.00666386	22/183	464/10877	0.00632573	51077/4809/23404/6908/6597/55759/83732/5437/27068/79042/80745/54853/51493/6894/54517/9221/10969/54512/92935/26156/56339/25983	22	6
GO:0044772	mitotic cell cycle phase transition	1.21422e-05	0.00666386	21/183	433/10877	0.00632573	5719/55215/7027/55795/4173/6659/57325/328/2146/1031/6241/3624/4998/9212/586/701/8636/677/9793/672/5558	21	6
GO:0022613	ribonucleoprotein complex biogenesis	1.2745e-05	0.00666386	20/183	400/10877	0.00632573	51077/4809/23404/26574/55759/10658/83732/6632/54853/6894/115416/84864/9221/6631/10969/54512/26156/26354/25983/55341	20	6
GO:0006397	mRNA processing	1.52782e-05	0.00666386	20/183	405/10877	0.00632573	988/4809/10658/55149/55131/5437/81608/84844/6632/7307/79042/8458/9128/1479/6631/6294/677/23028/56339/9667	20	6
GO:0045786	negative regulation of cell cycle	1.98154e-05	0.00724289	22/183	483/10877	0.00687538	988/5719/55215/10744/7027/4436/55795/6659/2146/5494/7153/1031/10040/6241/3624/9212/701/677/261726/3458/672/4221	22	6
GO:0000819	sister chromatid segregation	2.21411e-05	0.00724289	13/183	193/10877	0.00687538	10051/23047/10744/55795/7153/64151/10270/91272/9055/9212/701/9793/80152	13	6
GO:0010948	negative regulation of cell cycle process	3.52719e-05	0.0102563	15/183	262/10877	0.00973587	5719/55215/10744/7027/4436/55795/6659/2146/10040/6241/9212/701/677/672/4221	15	6
GO:0034470	ncRNA processing	4.21502e-05	0.0110307	17/183	331/10877	0.010471	51077/4809/23404/55759/83732/79042/80745/54853/51493/6894/54517/9221/10969/54512/26156/56339/25983	17	6
GO:0045930	negative regulation of mitotic cell cycle	5.04788e-05	0.0120094	14/183	239/10877	0.0114	5719/55215/10744/7027/4436/55795/6659/2146/7153/10040/9212/701/677/672	14	6
GO:0000070	mitotic sister chromatid segregation	6.19646e-05	0.0135134	10/183	129/10877	0.0128278	10051/23047/10744/55795/64151/10270/91272/9055/9212/701	10	6
GO:0034502	protein localization to chromosome	8.5003e-05	0.0171117	7/183	63/10877	0.0162435	112869/2146/91272/9212/701/26354/80152	7	6
GO:0006281	DNA repair	9.96959e-05	0.0181689	18/183	390/10877	0.017247	988/55215/51008/23047/4436/56946/86/9100/5437/328/10036/5983/51659/126074/672/10920/4221/23028	18	6
GO:0006361	transcription initiation from RNA polymerase I promoter	0.000109191	0.0181689	5/183	29/10877	0.017247	6908/6597/5437/9533/64425	5	6
GO:0008380	RNA splicing	0.000111082	0.0181689	17/183	358/10877	0.017247	988/4809/10658/55131/5437/81608/84844/6632/7307/79042/8458/9128/51493/1479/6631/23028/56339	17	6
GO:0071459	protein localization to chromosome, centromeric region	0.000155461	0.0222653	4/183	17/10877	0.0211355	91272/9212/701/80152	4	6
GO:0098813	nuclear chromosome segregation	0.000160167	0.0222653	13/183	234/10877	0.0211355	10051/23047/10744/55795/7153/64151/10270/91272/9055/9212/701/9793/80152	13	6
GO:0000280	nuclear division	0.00017473	0.0222653	15/183	302/10877	0.0211355	5719/10051/23047/10744/4436/55795/7153/64151/10040/10270/9371/91272/9055/9212/701	15	6
GO:0000075	cell cycle checkpoint	0.00017747	0.0222653	11/183	175/10877	0.0211355	988/55215/7027/4436/55795/6659/7153/9212/701/261726/672	11	6
GO:0006353	DNA-templated transcription, termination	0.000178667	0.0222653	8/183	94/10877	0.0211355	6908/5437/81608/9533/7307/8458/1479/64425	8	6
GO:0007059	chromosome segregation	0.000215535	0.0256388	14/183	274/10877	0.0243379	10051/23047/10744/55795/7153/64151/10270/91272/9055/9212/701/9793/672/80152	14	6
GO:0044843	cell cycle G1/S phase transition	0.000241469	0.027475	12/183	212/10877	0.0260809	7027/4173/6659/328/2146/1031/6241/3624/4998/586/5558/4221	12	6
GO:0007093	mitotic cell cycle checkpoint	0.000269566	0.029394	9/183	126/10877	0.0279025	55215/7027/4436/55795/6659/7153/9212/701/672	9	6
GO:0071103	DNA conformation change	0.000287897	0.029656	11/183	185/10877	0.0281513	10051/10146/4173/10036/266812/7153/64151/51659/10270/55723/80152	11	6
GO:0016072	rRNA metabolic process	0.000294634	0.029656	13/183	249/10877	0.0281513	51077/4809/23404/6597/55759/83732/54853/6894/9221/10969/54512/26156/25983	13	6
GO:0140014	mitotic nuclear division	0.000312054	0.0302462	12/183	218/10877	0.0287114	10051/23047/10744/55795/64151/10040/10270/9371/91272/9055/9212/701	12	6
GO:1901988	negative regulation of cell cycle phase transition	0.000361964	0.0332325	11/183	190/10877	0.0315462	5719/55215/7027/55795/6659/2146/9212/701/677/672/4221	11	6
GO:0006364	rRNA processing	0.000368262	0.0332325	12/183	222/10877	0.0315462	51077/4809/23404/55759/83732/54853/6894/9221/10969/54512/26156/25983	12	6
GO:0033044	regulation of chromosome organization	0.000446257	0.0389285	13/183	260/10877	0.0369532	23168/10744/55795/7422/6871/7153/10270/9212/701/672/26354/23028/9874	13	6
GO:0048285	organelle fission	0.000512703	0.0408671	15/183	334/10877	0.0387935	5719/10051/23047/10744/4436/55795/7153/64151/10040/10270/9371/91272/9055/9212/701	15	6
GO:0071027	nuclear RNA surveillance	0.000515329	0.0408671	3/183	10/10877	0.0387935	23404/55795/54512	3	6
GO:0071028	nuclear mRNA surveillance	0.000515329	0.0408671	3/183	10/10877	0.0387935	23404/55795/54512	3	6
GO:0006362	transcription elongation from RNA polymerase I promoter	0.000534507	0.0411413	4/183	23/10877	0.0390538	6908/5437/9533/64425	4	6
GO:0042273	ribosomal large subunit biogenesis	0.000587989	0.0429567	6/183	62/10877	0.0407771	4809/55759/54853/115416/10969/26156	6	6
GO:1901987	regulation of cell cycle phase transition	0.000598342	0.0429567	15/183	339/10877	0.0407771	5719/55215/7027/55795/6659/328/2146/1031/9212/701/8636/677/9793/672/4221	15	6
GO:0000082	G1/S transition of mitotic cell cycle	0.000607336	0.0429567	11/183	202/10877	0.0407771	7027/4173/6659/328/2146/1031/6241/3624/4998/586/5558	11	6
GO:0006363	termination of RNA polymerase I transcription	0.00063304	0.0435965	4/183	24/10877	0.0413844	6908/5437/9533/64425	4	6
GO:0010608	posttranscriptional regulation of gene expression	0.000686591	0.0457862	18/183	457/10877	0.043463	9818/5719/23404/9933/55795/10658/3315/6659/23173/5437/328/115416/9221/54512/677/56339/25983/4076	18	6
GO:0016973	poly(A)+ mRNA export from nucleus	0.000699828	0.0457862	3/183	11/10877	0.043463	56943/55795/10482	3	6
GO:0018205	peptidyl-lysine modification	0.000722875	0.0461406	14/183	309/10877	0.0437994	9818/23168/6871/86/112869/6659/57325/2146/7153/9212/387893/672/4221/26354	14	6
GO:1901991	negative regulation of mitotic cell cycle phase transition	0.000808549	0.0492205	10/183	177/10877	0.046723	5719/55215/7027/55795/6659/2146/9212/701/677/672	10	6
GO:0000377	RNA splicing, via transesterification reactions with bulged adenosine as nucleophile	0.000836025	0.0492205	13/183	278/10877	0.046723	988/4809/10658/5437/81608/84844/6632/7307/9128/1479/6631/23028/56339	13	6
GO:0000398	mRNA splicing, via spliceosome	0.000836025	0.0492205	13/183	278/10877	0.046723	988/4809/10658/5437/81608/84844/6632/7307/9128/1479/6631/23028/56339	13	6
GO:0000375	RNA splicing, via transesterification reactions	0.000864194	0.0492205	13/183	279/10877	0.046723	988/4809/10658/5437/81608/84844/6632/7307/9128/1479/6631/23028/56339	13	6
GO:0006323	DNA packaging	0.000881783	0.0492205	8/183	119/10877	0.046723	10051/10036/266812/7153/64151/10270/55723/80152	8	6
GO:1901990	regulation of mitotic cell cycle phase transition	0.000899014	0.0492205	14/183	316/10877	0.046723	5719/55215/7027/55795/6659/328/2146/1031/9212/701/8636/677/9793/672	14	6
GO:0051784	negative regulation of nuclear division	0.000903814	0.0492205	5/183	45/10877	0.046723	10744/4436/55795/10040/701	5	6
GO:0071025	RNA surveillance	0.000921591	0.0492205	3/183	12/10877	0.046723	23404/55795/54512	3	6
Gene set 17	GSE12705_EARLY_FILAMENTOUS_VS_LATE_FILAMENTOUS_EMBRYONIC_TROPHOBLAST_ELONGATION_UP								1
ID	Description	pvalue	p.adjust	GeneRatio	BgRatio	qvalue	geneID	Count	2
GO:0042254	ribosome biogenesis	7.47559e-08	0.000204756	20/188	280/10877	0.000198064	51077/29960/5393/29889/51388/55759/57602/55299/51096/10171/84128/55341/6059/84864/85865/25983/81887/28987/51068/9188	20	3
GO:0022613	ribonucleoprotein complex biogenesis	3.91049e-07	0.000535541	23/188	400/10877	0.000518037	51077/29960/11218/5393/29889/51388/55759/57602/55299/26065/51096/10171/84128/55341/26747/6059/84864/85865/25983/81887/28987/51068/9188	23	3
GO:0034660	ncRNA metabolic process	1.44466e-06	0.00131897	24/188	464/10877	0.00127586	51077/29960/5393/203522/1022/56165/5437/55759/112858/57602/51096/56339/10171/84128/54888/112495/79727/129450/25983/81887/6908/28987/57117/9188	24	3
GO:0034470	ncRNA processing	4.40816e-06	0.00301849	19/188	331/10877	0.00291983	51077/29960/5393/203522/55759/112858/57602/51096/56339/10171/84128/54888/79727/129450/25983/81887/28987/57117/9188	19	3
GO:0043486	histone exchange	2.21297e-05	0.0103839	6/188	34/10877	0.0100445	79682/80152/55839/50511/55166/8467	6	3
GO:0000469	cleavage involved in rRNA processing	3.03291e-05	0.0103839	5/188	22/10877	0.0100445	51077/5393/10171/81887/28987	5	3
GO:0034080	CENP-A containing nucleosome assembly	3.03291e-05	0.0103839	5/188	22/10877	0.0100445	79682/80152/55839/55166/8467	5	3
GO:0061641	CENP-A containing chromatin organization	3.03291e-05	0.0103839	5/188	22/10877	0.0100445	79682/80152/55839/55166/8467	5	3
GO:0006362	transcription elongation from RNA polymerase I promoter	3.82134e-05	0.0104667	5/188	23/10877	0.0101245	9533/1022/5437/9015/6908	5	3
GO:0031055	chromatin remodeling at centromere	3.82134e-05	0.0104667	5/188	23/10877	0.0101245	79682/80152/55839/55166/8467	5	3
GO:0006363	termination of RNA polymerase I transcription	4.75966e-05	0.0118516	5/188	24/10877	0.0114642	9533/1022/5437/9015/6908	5	3
GO:0071824	protein-DNA complex subunit organization	9.08817e-05	0.0202548	12/188	186/10877	0.0195928	51053/1022/79682/6117/80152/5701/55839/50511/55166/6908/4673/8467	12	3
GO:0065004	protein-DNA complex assembly	9.61347e-05	0.0202548	11/188	159/10877	0.0195928	51053/1022/79682/6117/80152/5701/55839/55166/6908/4673/8467	11	3
GO:0000460	maturation of 5.8S rRNA	0.000104051	0.0203568	5/188	28/10877	0.0196914	51077/5393/55759/10171/81887	5	3
GO:0006361	transcription initiation from RNA polymerase I promoter	0.000123978	0.0222141	5/188	29/10877	0.021488	9533/1022/5437/9015/6908	5	3
GO:0045815	positive regulation of gene expression, epigenetic	0.000129765	0.0222141	6/188	46/10877	0.021488	9533/5437/9015/6908/8467/9188	6	3
GO:0070987	error-free translesion synthesis	0.000172481	0.0248649	4/188	17/10877	0.0240522	5983/6117/5111/25898	4	3
GO:0006336	DNA replication-independent nucleosome assembly	0.000172484	0.0248649	5/188	31/10877	0.0240522	79682/80152/55839/55166/8467	5	3
GO:0034508	centromere complex assembly	0.000172484	0.0248649	5/188	31/10877	0.0240522	79682/80152/55839/55166/8467	5	3
GO:0090502	RNA phosphodiester bond hydrolysis, endonucleolytic	0.000185587	0.0254161	6/188	49/10877	0.0245853	51077/9156/10171/51163/81887/28987	6	3
GO:0034724	DNA replication-independent nucleosome organization	0.000201584	0.0260537	5/188	32/10877	0.0252021	79682/80152/55839/55166/8467	5	3
GO:0000466	maturation of 5.8S rRNA from tricistronic rRNA transcript (SSU-rRNA, 5.8S rRNA, LSU-rRNA)	0.000218779	0.0260537	4/188	18/10877	0.0252021	51077/5393/55759/10171	4	3
GO:0042276	error-prone translesion synthesis	0.000218779	0.0260537	4/188	18/10877	0.0252021	5983/5427/6117/5111	4	3
GO:0006360	transcription by RNA polymerase I	0.000258844	0.028359	6/188	52/10877	0.027432	9533/1022/5437/84128/9015/6908	6	3
GO:0044786	cell cycle DNA replication	0.000258844	0.028359	6/188	52/10877	0.027432	5983/51053/10735/5427/6117/5111	6	3
GO:0019985	translesion synthesis	0.000270857	0.0285337	5/188	34/10877	0.0276011	5983/5427/6117/5111/25898	5	3
GO:0043044	ATP-dependent chromatin remodeling	0.000287747	0.0291903	6/188	53/10877	0.0282362	79682/80152/55839/50511/55166/8467	6	3
GO:0016072	rRNA metabolic process	0.000382615	0.0368242	13/188	249/10877	0.0356206	51077/29960/5393/55759/57602/51096/10171/84128/112495/25983/81887/28987/9188	13	3
GO:0000731	DNA synthesis involved in DNA repair	0.000389888	0.0368242	6/188	56/10877	0.0356206	5983/9156/5427/6117/5111/25898	6	3
GO:2000765	regulation of cytoplasmic translation	0.00041089	0.0375143	4/188	21/10877	0.0362881	56339/79727/120526/51611	4	3
GO:0010501	RNA secondary structure unwinding	0.000462031	0.0402428	5/188	38/10877	0.0389274	11218/11269/1662/55308/9188	5	3
GO:0006364	rRNA processing	0.000470161	0.0402428	12/188	222/10877	0.0389274	51077/29960/5393/55759/57602/51096/10171/84128/25983/81887/28987/9188	12	3
GO:0032201	telomere maintenance via semi-conservative replication	0.000495459	0.0411231	4/188	22/10877	0.039779	5983/5427/6117/5111	4	3
Gene set 18	GSE12705_EARLY_FILAMENTOUS_VS_LATE_FILAMENTOUS_EMBRYONIC_TROPHOBLAST_ELONGATION_DN								1
ID	Description	pvalue	p.adjust	GeneRatio	BgRatio	qvalue	geneID	Count	2
Gene set 19	GSE13528_AD_LIB_VS_FASTED_MC4R_D298_LIVER_UP								4
ID	Description	pvalue	p.adjust	GeneRatio	BgRatio	qvalue	geneID	Count	5
GO:0016126	sterol biosynthetic process	4.14818e-20	1.05115e-16	20/188	66/10877	1.0043e-16	6309/1717/6307/1595/3422/6713/10682/6721/2194/11161/7108/51706/2224/4597/3638/1718/31/3157/3156/2222	20	6
GO:1901615	organic hydroxy compound metabolic process	1.04051e-19	1.31832e-16	38/188	362/10877	1.25956e-16	6309/1717/6307/1595/3422/216/6713/10682/57026/6721/2194/11161/7108/26007/55586/51706/2224/4597/3638/1718/8694/23262/1579/55902/31/5641/10577/3157/151056/4435/1733/3156/29968/4864/1652/1312/2222/27122	38	6
GO:1902653	secondary alcohol biosynthetic process	2.92869e-19	2.47376e-16	19/188	62/10877	2.3635e-16	6309/1717/6307/1595/3422/6713/10682/6721/2194/11161/7108/2224/4597/3638/1718/31/3157/3156/2222	19	6
GO:0008202	steroid metabolic process	2.00753e-18	1.27177e-15	30/188	228/10877	1.21508e-15	6309/51171/1717/6307/1595/3422/6713/10682/6721/2194/11161/7108/1565/51706/2224/4597/3638/183/1718/31/5641/10577/3157/3156/7367/4864/866/1312/2222/27122	30	6
GO:0006695	cholesterol biosynthetic process	4.0944e-18	2.07504e-15	18/188	60/10877	1.98255e-15	6309/1717/6307/1595/3422/6713/10682/6721/2194/7108/2224/4597/3638/1718/31/3157/3156/2222	18	6
GO:0016125	sterol metabolic process	5.91631e-17	2.49865e-14	22/188	119/10877	2.38728e-14	6309/1717/6307/1595/3422/6713/10682/6721/2194/11161/7108/51706/2224/4597/3638/1718/31/10577/3157/3156/4864/2222	22	6
GO:1902652	secondary alcohol metabolic process	2.3188e-16	8.39405e-14	21/188	112/10877	8.01991e-14	6309/1717/6307/1595/3422/6713/10682/6721/2194/11161/7108/2224/4597/3638/1718/31/10577/3157/3156/4864/2222	21	6
GO:0006066	alcohol metabolic process	3.40148e-16	1.07742e-13	28/188	233/10877	1.02939e-13	6309/1717/6307/1595/3422/216/6713/10682/6721/2194/11161/7108/26007/55586/2224/4597/3638/1718/8694/23262/55902/31/10577/3157/151056/3156/4864/2222	28	6
GO:1901617	organic hydroxy compound biosynthetic process	1.04492e-15	2.94202e-13	25/188	186/10877	2.81089e-13	6309/1717/6307/1595/3422/6713/10682/6721/2194/11161/7108/51706/2224/4597/3638/1718/23262/31/3157/4435/3156/29968/1652/2222/27122	25	6
GO:0008203	cholesterol metabolic process	1.32473e-15	3.1092e-13	20/188	107/10877	2.97062e-13	6309/1717/6307/1595/3422/6713/10682/6721/2194/7108/2224/4597/3638/1718/31/10577/3157/3156/4864/2222	20	6
GO:0045540	regulation of cholesterol biosynthetic process	1.34969e-15	3.1092e-13	14/188	39/10877	2.97062e-13	6309/1717/1595/3422/6713/6721/2194/7108/2224/4597/31/3157/3156/2222	14	6
GO:0046165	alcohol biosynthetic process	3.35411e-15	6.63818e-13	20/188	112/10877	6.34229e-13	6309/1717/6307/1595/3422/6713/10682/6721/2194/11161/7108/2224/4597/3638/1718/23262/31/3157/3156/2222	20	6
GO:0006694	steroid biosynthetic process	3.40554e-15	6.63818e-13	22/188	143/10877	6.34229e-13	6309/51171/1717/6307/1595/3422/6713/10682/6721/2194/11161/7108/51706/2224/4597/3638/1718/31/3157/3156/2222/27122	22	6
GO:0050810	regulation of steroid biosynthetic process	2.86962e-14	5.194e-12	16/188	69/10877	4.96249e-12	6309/1717/1595/3422/6713/6721/2194/7108/2224/4597/3638/31/3157/3156/2222/27122	16	6
GO:0090181	regulation of cholesterol metabolic process	3.76822e-14	6.36578e-12	14/188	48/10877	6.08204e-12	6309/1717/1595/3422/6713/6721/2194/7108/2224/4597/31/3157/3156/2222	14	6
GO:1902930	regulation of alcohol biosynthetic process	9.65304e-14	1.5288e-11	14/188	51/10877	1.46066e-11	6309/1717/1595/3422/6713/6721/2194/7108/2224/4597/31/3157/3156/2222	14	6
GO:0019218	regulation of steroid metabolic process	1.64646e-13	2.4542e-11	17/188	90/10877	2.34481e-11	6309/1717/1595/3422/6713/6721/2194/7108/2224/4597/3638/183/31/3157/3156/2222/27122	17	6
GO:0006732	coenzyme metabolic process	5.94564e-12	8.37014e-10	27/188	318/10877	7.99706e-10	10840/57026/7086/2194/9524/4199/4597/2023/113235/8694/55902/31/3157/4860/10135/874/8836/2326/3156/5230/55276/4338/5224/10327/5096/55312/2182	27	6
GO:0051186	cofactor metabolic process	9.19235e-12	1.22597e-09	32/188	456/10877	1.17132e-09	10840/645/57026/7086/2194/9524/79944/4199/4597/2023/113235/8694/55902/31/2952/79017/3157/4860/10135/874/8836/2326/3156/5230/29968/55276/4338/5224/10327/5096/55312/2182	32	6
GO:0046890	regulation of lipid biosynthetic process	1.02466e-09	1.29824e-07	16/188	133/10877	1.24038e-07	6309/1717/1595/3422/6713/6721/2194/7108/2224/4597/3638/31/3157/3156/2222/27122	16	6
GO:0006720	isoprenoid metabolic process	5.43539e-08	6.5587e-06	12/188	92/10877	6.26636e-06	3422/216/1565/2224/4597/8694/10577/3157/151056/5139/3156/2222	12	6
GO:0032787	monocarboxylic acid metabolic process	7.47902e-08	8.61447e-06	26/188	456/10877	8.2305e-06	6307/1666/3033/2194/1565/9524/4199/3638/2023/1579/55902/31/1632/3995/633/10941/9663/5230/7367/5224/4864/5354/1553/10327/5096/2182	26	6
GO:0019216	regulation of lipid metabolic process	2.30625e-07	2.54088e-05	20/188	300/10877	2.42763e-05	6309/1717/1595/3422/6713/6721/2194/7108/2224/4199/4597/3638/183/1579/31/10577/3157/3156/2222/27122	20	6
GO:0044282	small molecule catabolic process	4.25245e-07	4.48988e-05	21/188	341/10877	4.28975e-05	10840/216/1666/57026/27294/3033/26007/55586/2023/1579/1632/4860/874/9663/2990/5230/55276/5224/2752/10327/5096	21	6
GO:0008299	isoprenoid biosynthetic process	7.80062e-07	7.90671e-05	6/188	20/10877	7.55428e-05	3422/2224/4597/3157/3156/2222	6	6
GO:0006766	vitamin metabolic process	2.46476e-06	0.00024022	11/188	108/10877	0.000229512	10840/57026/2194/113235/31/5641/874/29968/10327/5096/55312	11	6
GO:0046365	monosaccharide catabolic process	4.17172e-06	0.000385067	8/188	55/10877	0.000367904	216/27294/26007/2023/5230/55276/5224/10327	8	6
GO:0006767	water-soluble vitamin metabolic process	4.25489e-06	0.000385067	9/188	73/10877	0.000367904	10840/57026/2194/113235/31/29968/10327/5096/55312	9	6
GO:0006631	fatty acid metabolic process	6.57249e-06	0.0005743	17/188	279/10877	0.000548702	6307/1666/3033/2194/1565/9524/3638/1579/55902/31/1632/3995/9663/5354/1553/5096/2182	17	6
GO:0062012	regulation of small molecule metabolic process	7.08994e-06	0.000598864	20/188	374/10877	0.000572171	6309/1717/1595/3422/6713/6721/2194/7108/2224/4199/4597/3638/2023/31/3157/3156/5224/1312/2222/27122	20	6
GO:0006081	cellular aldehyde metabolic process	8.14351e-06	0.000665666	8/188	60/10877	0.000635996	216/57026/7086/26007/55276/5224/10327/27122	8	6
GO:0051188	cofactor biosynthetic process	8.58634e-06	0.000679931	16/188	255/10877	0.000649625	2194/9524/4199/2023/55902/31/79017/4860/10135/5230/29968/4338/5224/10327/55312/2182	16	6
GO:0009108	coenzyme biosynthetic process	1.45656e-05	0.00111846	14/188	208/10877	0.00106861	2194/9524/4199/2023/55902/31/4860/10135/5230/4338/5224/10327/55312/2182	14	6
GO:0019682	glyceraldehyde-3-phosphate metabolic process	1.8365e-05	0.00136874	5/188	20/10877	0.00130773	216/7086/26007/55276/5224	5	6
GO:0042445	hormone metabolic process	4.42399e-05	0.00320297	11/188	146/10877	0.0030602	51171/1717/216/183/8694/151056/1733/866/1312/27344/27122	11	6
GO:0006721	terpenoid metabolic process	4.74181e-05	0.00333771	8/188	76/10877	0.00318894	216/1565/2224/8694/3157/151056/5139/2222	8	6
GO:0072524	pyridine-containing compound metabolic process	5.3327e-05	0.00365218	11/188	149/10877	0.00348939	57026/7086/4199/2023/4860/10135/2326/5230/29968/55276/5224	11	6
GO:0006790	sulfur compound metabolic process	6.51658e-05	0.00434553	15/188	269/10877	0.00415184	2194/9524/4597/8694/55902/31/64131/2952/79017/3157/633/1312/10327/5096/2182	15	6
GO:0006637	acyl-CoA metabolic process	6.87334e-05	0.00435426	8/188	80/10877	0.00416018	2194/9524/4597/8694/55902/31/3157/2182	8	6
GO:0035383	thioester metabolic process	6.87334e-05	0.00435426	8/188	80/10877	0.00416018	2194/9524/4597/8694/55902/31/3157/2182	8	6
GO:0019320	hexose catabolic process	0.000129765	0.00782913	6/188	46/10877	0.00748017	216/26007/2023/5230/55276/5224	6	6
GO:0019748	secondary metabolic process	0.000129765	0.00782913	6/188	46/10877	0.00748017	1565/4435/2326/5224/1553/1652	6	6
GO:0006084	acetyl-CoA metabolic process	0.000146704	0.00844883	5/188	30/10877	0.00807224	2194/4597/55902/31/3157	5	6
GO:0006739	NADP metabolic process	0.000146704	0.00844883	5/188	30/10877	0.00807224	7086/4199/2326/55276/5224	5	6
GO:0044272	sulfur compound biosynthetic process	0.000163207	0.00919038	10/188	141/10877	0.00878074	2194/9524/55902/31/64131/2952/79017/633/10327/2182	10	6
GO:0035337	fatty-acyl-CoA metabolic process	0.000311612	0.0171658	5/188	35/10877	0.0164006	2194/9524/8694/31/2182	5	6
GO:0005975	carbohydrate metabolic process	0.000322013	0.0173613	19/188	454/10877	0.0165874	216/27294/7086/26007/55586/4199/2023/23262/10941/2632/2990/5230/7367/55276/112937/5224/10327/64409/79411	19	6
GO:0016053	organic acid biosynthetic process	0.000381403	0.019724	15/188	316/10877	0.0188448	2194/9524/3638/2023/55902/31/5723/3995/633/5230/29968/5224/5354/2752/10327	15	6
GO:0046394	carboxylic acid biosynthetic process	0.000381403	0.019724	15/188	316/10877	0.0188448	2194/9524/3638/2023/55902/31/5723/3995/633/5230/29968/5224/5354/2752/10327	15	6
GO:0006733	oxidoreduction coenzyme metabolic process	0.000431242	0.0218553	10/188	159/10877	0.0208812	7086/4199/2023/4860/10135/2326/3156/5230/55276/5224	10	6
GO:0006063	uronic acid metabolic process	0.000557621	0.0271733	3/188	10/10877	0.0259621	10941/7367/10327	3	6
GO:0019585	glucuronate metabolic process	0.000557621	0.0271733	3/188	10/10877	0.0259621	10941/7367/10327	3	6
GO:0043312	neutrophil degranulation	0.00064137	0.0306648	16/188	368/10877	0.0292979	5004/197/2934/5478/8694/290/55754/10577/4860/8836/2990/2512/6386/55276/2040/80184	16	6
GO:0002283	neutrophil activation involved in immune response	0.000660404	0.0309901	16/188	369/10877	0.0296088	5004/197/2934/5478/8694/290/55754/10577/4860/8836/2990/2512/6386/55276/2040/80184	16	6
GO:0016052	carbohydrate catabolic process	0.000676022	0.0311462	9/188	139/10877	0.0297579	216/27294/26007/55586/2023/5230/55276/5224/10327	9	6
GO:1901568	fatty acid derivative metabolic process	0.000747953	0.0338449	8/188	113/10877	0.0323363	2194/1565/9524/8694/1579/31/1553/2182	8	6
GO:0016485	protein processing	0.000791821	0.0352013	11/188	203/10877	0.0336323	2934/431705/183/2023/1718/5641/5230/1201/27344/90701/9028	11	6
GO:0042119	neutrophil activation	0.000807696	0.0352879	16/188	376/10877	0.0337151	5004/197/2934/5478/8694/290/55754/10577/4860/8836/2990/2512/6386/55276/2040/80184	16	6
GO:0019362	pyridine nucleotide metabolic process	0.00087127	0.0362292	9/188	144/10877	0.0346143	7086/4199/2023/4860/10135/2326/5230/55276/5224	9	6
GO:0046496	nicotinamide nucleotide metabolic process	0.00087127	0.0362292	9/188	144/10877	0.0346143	7086/4199/2023/4860/10135/2326/5230/55276/5224	9	6
GO:0002446	neutrophil mediated immunity	0.000903821	0.0362292	16/188	380/10877	0.0346143	5004/197/2934/5478/8694/290/55754/10577/4860/8836/2990/2512/6386/55276/2040/80184	16	6
GO:0035384	thioester biosynthetic process	0.000919398	0.0362292	5/188	44/10877	0.0346143	2194/9524/55902/31/2182	5	6
GO:0071616	acyl-CoA biosynthetic process	0.000919398	0.0362292	5/188	44/10877	0.0346143	2194/9524/55902/31/2182	5	6
GO:1901616	organic hydroxy compound catabolic process	0.000919398	0.0362292	5/188	44/10877	0.0346143	57026/26007/55586/1579/1312	5	6
GO:0036230	granulocyte activation	0.00092932	0.0362292	16/188	381/10877	0.0346143	5004/197/2934/5478/8694/290/55754/10577/4860/8836/2990/2512/6386/55276/2040/80184	16	6
GO:0009109	coenzyme catabolic process	0.000996537	0.038261	3/188	12/10877	0.0365556	10840/57026/874	3	6
GO:0046949	fatty-acyl-CoA biosynthetic process	0.00111117	0.0420253	4/188	27/10877	0.0401521	2194/9524/31/2182	4	6
GO:0009435	NAD biosynthetic process	0.00112858	0.0420563	5/188	46/10877	0.0401817	2023/4860/10135/5230/5224	5	6
GO:0005996	monosaccharide metabolic process	0.00126524	0.0464654	11/188	215/10877	0.0443943	216/27294/7086/26007/2023/10941/5230/7367/55276/5224/10327	11	6
Gene set 20	GSE13528_AD_LIB_VS_FASTED_MC4R_D298_LIVER_DN								4
ID	Description	pvalue	p.adjust	GeneRatio	BgRatio	qvalue	geneID	Count	5
GO:0016042	lipid catabolic process	1.21109e-09	1.71834e-06	21/194	236/10877	1.60492e-06	5825/3032/3030/1891/37/3417/7067/2110/10449/5465/33/5050/7941/1373/337/335/30/1384/7533/57406/35	21	6
GO:0006635	fatty acid beta-oxidation	1.29981e-09	1.71834e-06	12/194	65/10877	1.60492e-06	5825/3032/3030/1891/37/2110/10449/5465/33/30/1384/35	12	6
GO:0032787	monocarboxylic acid metabolic process	2.12108e-09	1.86938e-06	29/194	456/10877	1.74598e-06	5091/3945/5825/3032/25874/3030/1891/37/2203/5211/3417/54898/2110/51660/10449/10728/5465/33/3939/229/22937/337/114883/335/54704/30/1384/57122/35	29	6
GO:0044242	cellular lipid catabolic process	3.7695e-09	2.43373e-06	17/194	161/10877	2.27308e-06	5825/3032/3030/1891/37/3417/2110/10449/5465/33/1373/337/335/30/1384/57406/35	17	6
GO:0034440	lipid oxidation	4.60236e-09	2.43373e-06	13/194	88/10877	2.27308e-06	5825/3032/3030/1891/37/2110/10449/5465/33/7941/30/1384/35	13	6
GO:0019395	fatty acid oxidation	3.55826e-08	1.56801e-05	12/194	86/10877	1.4645e-05	5825/3032/3030/1891/37/2110/10449/5465/33/30/1384/35	12	6
GO:0009062	fatty acid catabolic process	9.81217e-08	3.7062e-05	12/194	94/10877	3.46156e-05	5825/3032/3030/1891/37/2110/10449/5465/33/30/1384/35	12	6
GO:0072329	monocarboxylic acid catabolic process	6.22003e-07	0.000205572	12/194	111/10877	0.000192003	5825/3032/3030/1891/37/2110/10449/5465/33/30/1384/35	12	6
GO:0030258	lipid modification	2.1661e-06	0.000536684	16/194	222/10877	0.000501259	3931/5825/3032/3030/1891/37/2110/10449/5465/33/7941/337/335/30/1384/35	16	6
GO:0006631	fatty acid metabolic process	2.42552e-06	0.000536684	18/194	279/10877	0.000501259	5825/3032/3030/1891/37/54898/2110/10449/10728/5465/33/22937/337/335/54704/30/1384/35	18	6
GO:0016054	organic acid catabolic process	2.43578e-06	0.000536684	16/194	224/10877	0.000501259	5825/3032/3030/1891/37/2110/10449/5465/23576/33/501/3081/30/1384/883/35	16	6
GO:0046395	carboxylic acid catabolic process	2.43578e-06	0.000536684	16/194	224/10877	0.000501259	5825/3032/3030/1891/37/2110/10449/5465/23576/33/501/3081/30/1384/883/35	16	6
GO:0044282	small molecule catabolic process	2.85144e-06	0.000579938	20/194	341/10877	0.000541657	5825/3032/3030/1891/37/5211/2110/2592/10449/5465/23576/55270/33/501/3081/229/30/1384/883/35	20	6
GO:0006090	pyruvate metabolic process	5.68579e-06	0.0010738	11/194	114/10877	0.00100292	5091/3945/25874/2203/5211/51660/5465/3939/229/54704/57122	11	6
GO:0072330	monocarboxylic acid biosynthetic process	1.05347e-05	0.00185692	15/194	223/10877	0.00173435	5825/37/2203/5211/54898/10728/5465/33/3939/229/22937/337/114883/335/57122	15	6
GO:0071827	plasma lipoprotein particle organization	2.64326e-05	0.00436798	6/194	34/10877	0.00407966	346/3931/7941/337/335/5034	6	6
GO:0034377	plasma lipoprotein particle assembly	3.52681e-05	0.00545883	5/194	22/10877	0.00509851	346/3931/337/335/5034	5	6
GO:0071825	protein-lipid complex subunit organization	3.7163e-05	0.00545883	6/194	36/10877	0.00509851	346/3931/7941/337/335/5034	6	6
GO:0016053	organic acid biosynthetic process	4.94498e-05	0.00653727	17/194	316/10877	0.00610575	5825/37/2203/5211/54898/10728/5465/33/3939/229/22937/1373/337/114883/335/883/57122	17	6
GO:0046394	carboxylic acid biosynthetic process	4.94498e-05	0.00653727	17/194	316/10877	0.00610575	5825/37/2203/5211/54898/10728/5465/33/3939/229/22937/1373/337/114883/335/883/57122	17	6
GO:0006732	coenzyme metabolic process	5.35052e-05	0.00664565	17/194	318/10877	0.00620698	5091/3945/3158/25874/2203/5211/3417/54898/2350/51660/5465/3939/229/54704/1528/57122/2348	17	6
GO:0065005	protein-lipid complex assembly	5.52967e-05	0.00664565	5/194	24/10877	0.00620698	346/3931/337/335/5034	5	6
GO:0051186	cofactor metabolic process	6.28714e-05	0.00722747	21/194	456/10877	0.0067504	5091/3945/3158/25874/2203/5211/3417/54898/2350/51660/1937/5465/3939/229/337/54704/1528/10013/2644/57122/2348	21	6
GO:0033539	fatty acid beta-oxidation using acyl-CoA dehydrogenase	0.000150942	0.0166288	4/194	16/10877	0.0155312	37/2110/33/35	4	6
GO:0019217	regulation of fatty acid metabolic process	0.00021834	0.0230917	7/194	69/10877	0.0215674	37/5465/33/22937/337/335/54704	7	6
GO:0042304	regulation of fatty acid biosynthetic process	0.000233339	0.02363	5/194	32/10877	0.0220702	37/33/22937/337/335	5	6
GO:0019362	pyridine nucleotide metabolic process	0.000250242	0.02363	10/194	144/10877	0.0220702	3945/25874/2203/5211/3417/51660/5465/3939/229/57122	10	6
GO:0046496	nicotinamide nucleotide metabolic process	0.000250242	0.02363	10/194	144/10877	0.0220702	3945/25874/2203/5211/3417/51660/5465/3939/229/57122	10	6
GO:0006414	translational elongation	0.000288496	0.0263028	9/194	120/10877	0.0245666	64928/64975/6181/1937/64949/63875/3396/51091/1933	9	6
GO:0072524	pyridine-containing compound metabolic process	0.000329613	0.0290499	10/194	149/10877	0.0271324	3945/25874/2203/5211/3417/51660/5465/3939/229/57122	10	6
GO:0034367	protein-containing complex remodeling	0.000379972	0.0304438	4/194	20/10877	0.0284343	3931/7941/337/335	4	6
GO:0034368	protein-lipid complex remodeling	0.000379972	0.0304438	4/194	20/10877	0.0284343	3931/7941/337/335	4	6
GO:0034369	plasma lipoprotein particle remodeling	0.000379972	0.0304438	4/194	20/10877	0.0284343	3931/7941/337/335	4	6
GO:0006633	fatty acid biosynthetic process	0.000406277	0.031594	8/194	100/10877	0.0295086	5825/37/54898/10728/33/22937/337/335	8	6
GO:0006733	oxidoreduction coenzyme metabolic process	0.000552156	0.0417115	10/194	159/10877	0.0389581	3945/25874/2203/5211/3417/51660/5465/3939/229/57122	10	6
GO:0034370	triglyceride-rich lipoprotein particle remodeling	0.00061125	0.0448929	3/194	10/10877	0.0419296	3931/337/335	3	6
GO:0008203	cholesterol metabolic process	0.00064014	0.0457441	8/194	107/10877	0.0427246	3931/3158/37/10449/33/22937/337/335	8	6
GO:0015718	monocarboxylic acid transport	0.000680981	0.0473819	8/194	108/10877	0.0442543	5825/25874/788/51660/5465/6578/8273/117247	8	6
Gene set 21	GSE13528_AD_LIB_VS_FASTED_MC4R_N298_LIVER_UP								1
ID	Description	pvalue	p.adjust	GeneRatio	BgRatio	qvalue	geneID	Count	2
GO:0016126	sterol biosynthetic process	4.91577e-26	1.36708e-22	24/190	66/10877	1.32933e-22	6721/1595/4597/6309/1717/6713/10682/3422/7108/2224/6307/1718/3157/2194/31/47/3638/50814/11161/51706/3156/6319/2222/4598	24	3
GO:1902653	secondary alcohol biosynthetic process	3.18469e-25	4.42832e-22	23/190	62/10877	4.30604e-22	6721/1595/4597/6309/1717/6713/10682/3422/7108/2224/6307/1718/3157/2194/31/47/3638/50814/11161/3156/6319/2222/4598	23	3
GO:0006695	cholesterol biosynthetic process	4.94254e-24	4.58174e-21	22/190	60/10877	4.45523e-21	6721/1595/4597/6309/1717/6713/10682/3422/7108/2224/6307/1718/3157/2194/31/47/3638/50814/3156/6319/2222/4598	22	3
GO:0016125	sterol metabolic process	5.51749e-23	3.83603e-20	27/190	119/10877	3.73011e-20	6721/1595/4597/6309/1717/6713/10682/3422/7108/2224/4864/6307/56603/1718/3157/2194/31/47/3638/50814/10577/11161/51706/3156/6319/2222/4598	27	3
GO:1902652	secondary alcohol metabolic process	3.74773e-21	2.08449e-18	25/190	112/10877	2.02693e-18	6721/1595/4597/6309/1717/6713/10682/3422/7108/2224/4864/6307/1718/3157/2194/31/47/3638/50814/10577/11161/3156/6319/2222/4598	25	3
GO:0008203	cholesterol metabolic process	2.14546e-20	9.94419e-18	24/190	107/10877	9.66961e-18	6721/1595/4597/6309/1717/6713/10682/3422/7108/2224/4864/6307/1718/3157/2194/31/47/3638/50814/10577/3156/6319/2222/4598	24	3
GO:0046165	alcohol biosynthetic process	6.82038e-20	2.70964e-17	24/190	112/10877	2.63482e-17	6721/1595/4597/6309/1717/6713/10682/3422/7108/2224/6307/1718/3157/2194/31/47/3638/50814/11161/3156/6319/2222/9677/4598	24	3
GO:0006694	steroid biosynthetic process	1.46705e-19	5.09982e-17	26/190	143/10877	4.959e-17	6721/1595/4597/6309/1717/6713/10682/3422/7108/2224/6307/1718/3157/2194/31/51171/47/5087/3638/50814/11161/51706/3156/6319/2222/4598	26	3
GO:0008202	steroid metabolic process	2.65095e-19	8.19145e-17	31/190	228/10877	7.96526e-17	6721/1595/4597/6309/1717/6713/10682/3422/7108/2224/4864/6307/56603/1718/3157/2194/1565/31/51171/47/5087/5641/3638/50814/10577/11161/51706/3156/6319/2222/4598	31	3
GO:1901617	organic hydroxy compound biosynthetic process	1.04577e-18	2.66747e-16	28/190	186/10877	2.59381e-16	6721/1595/4597/6309/1717/6713/10682/3422/7108/2224/6307/1718/3157/2194/31/47/29968/3638/50814/11161/1652/55163/51706/3156/6319/2222/9677/4598	28	3
GO:0045540	regulation of cholesterol biosynthetic process	1.05509e-18	2.66747e-16	16/190	39/10877	2.59381e-16	6721/1595/4597/6309/1717/6713/3422/7108/2224/3157/2194/31/3156/6319/2222/4598	16	3
GO:1901615	organic hydroxy compound metabolic process	9.37053e-18	2.17162e-15	36/190	362/10877	2.11166e-15	6721/1595/4597/6309/1717/6713/10682/3422/7108/2224/4864/6307/56603/1718/3157/2194/31/216/47/29968/5641/3638/50814/10577/11161/1652/55163/51706/3156/6319/55902/2222/55586/9677/4598/18	36	3
GO:0006066	alcohol metabolic process	4.90295e-17	1.04885e-14	29/190	233/10877	1.01989e-14	6721/1595/4597/6309/1717/6713/10682/3422/7108/2224/4864/6307/1718/3157/2194/31/216/47/3638/50814/10577/11161/3156/6319/55902/2222/55586/9677/4598	29	3
GO:0090181	regulation of cholesterol metabolic process	5.50174e-17	1.09288e-14	16/190	48/10877	1.06271e-14	6721/1595/4597/6309/1717/6713/3422/7108/2224/3157/2194/31/3156/6319/2222/4598	16	3
GO:1902930	regulation of alcohol biosynthetic process	1.67248e-16	3.10077e-14	16/190	51/10877	3.01515e-14	6721/1595/4597/6309/1717/6713/3422/7108/2224/3157/2194/31/3156/6319/2222/4598	16	3
GO:0050810	regulation of steroid biosynthetic process	1.72273e-15	2.99432e-13	17/190	69/10877	2.91164e-13	6721/1595/4597/6309/1717/6713/3422/7108/2224/3157/2194/31/3638/3156/6319/2222/4598	17	3
GO:0019218	regulation of steroid metabolic process	1.96154e-13	3.20885e-11	17/190	90/10877	3.12025e-11	6721/1595/4597/6309/1717/6713/3422/7108/2224/3157/2194/31/3638/3156/6319/2222/4598	17	3
GO:0046890	regulation of lipid biosynthetic process	1.40758e-11	2.17471e-09	18/190	133/10877	2.11466e-09	6721/1595/4597/6309/1717/6713/3422/7108/2224/2170/3157/2194/31/3638/3156/6319/2222/4598	18	3
GO:0008299	isoprenoid biosynthetic process	2.84249e-08	4.16051e-06	7/190	20/10877	4.04563e-06	4597/3422/2224/3157/3156/2222/4598	7	3
GO:0051186	cofactor metabolic process	3.53925e-07	4.92133e-05	25/190	456/10877	4.78544e-05	4597/10840/3157/2194/31/5230/9524/47/259/6776/29968/79017/326625/55163/2023/3156/3101/6319/55902/10327/4257/7086/2326/645/4598	25	3
GO:0006720	isoprenoid metabolic process	5.42698e-07	7.18687e-05	11/190	92/10877	6.98842e-05	4597/3422/2224/56603/3157/1565/216/10577/3156/2222/4598	11	3
GO:0006084	acetyl-CoA metabolic process	6.43803e-07	8.13825e-05	7/190	30/10877	7.91354e-05	4597/3157/2194/31/47/55902/4598	7	3
GO:0044272	sulfur compound biosynthetic process	1.04822e-06	0.000126744	13/190	141/10877	0.000123244	2194/1036/31/9524/47/79017/6319/55902/10327/2331/4257/64131/55256	13	3
GO:0019216	regulation of lipid metabolic process	1.20713e-06	0.000139877	19/190	300/10877	0.000136014	6721/1595/4597/6309/1717/6713/3422/7108/2224/2170/3157/2194/31/3638/10577/3156/6319/2222/4598	19	3
GO:0032787	monocarboxylic acid metabolic process	1.28711e-06	0.000143178	24/190	456/10877	0.000139224	4864/2170/6307/56603/1666/1632/2194/1565/31/5230/9524/47/6776/3638/2023/3101/6319/55902/10327/4257/55862/9663/3033/18	24	3
GO:0062012	regulation of small molecule metabolic process	2.2634e-06	0.000242097	21/190	374/10877	0.000235412	6721/1595/4597/6309/1717/6713/3422/7108/2224/2170/3157/2194/31/3638/3486/2023/3156/6319/2222/4946/4598	21	3
GO:0006790	sulfur compound metabolic process	4.6557e-06	0.000479538	17/190	269/10877	0.000466296	4597/3157/2194/1036/31/9524/47/6776/79017/6319/55902/10327/2331/4257/64131/4598/55256	17	3
GO:0006631	fatty acid metabolic process	7.57469e-06	0.000752329	17/190	279/10877	0.000731556	2170/6307/1666/1632/2194/1565/31/9524/47/6776/3638/6319/55902/4257/55862/9663/3033	17	3
GO:0006637	acyl-CoA metabolic process	9.97764e-06	0.000924928	9/190	80/10877	0.000899388	4597/3157/2194/31/9524/47/6319/55902/4598	9	3
GO:0035383	thioester metabolic process	9.97764e-06	0.000924928	9/190	80/10877	0.000899388	4597/3157/2194/31/9524/47/6319/55902/4598	9	3
GO:0006732	coenzyme metabolic process	1.11951e-05	0.00100431	18/190	318/10877	0.000976579	4597/10840/3157/2194/31/5230/9524/47/55163/2023/3156/3101/6319/55902/10327/7086/2326/4598	18	3
GO:0016053	organic acid biosynthetic process	3.79438e-05	0.00319763	17/190	316/10877	0.00310933	2194/1036/31/5230/9524/47/29968/3638/2023/3101/6319/55902/10327/4257/5723/18/55256	17	3
GO:0046394	carboxylic acid biosynthetic process	3.79438e-05	0.00319763	17/190	316/10877	0.00310933	2194/1036/31/5230/9524/47/29968/3638/2023/3101/6319/55902/10327/4257/5723/18/55256	17	3
GO:0046949	fatty-acyl-CoA biosynthetic process	9.11287e-05	0.00745379	5/190	27/10877	0.00724798	2194/31/9524/47/6319	5	3
GO:0035384	thioester biosynthetic process	0.00010668	0.00824101	6/190	44/10877	0.00801345	2194/31/9524/47/6319/55902	6	3
GO:0071616	acyl-CoA biosynthetic process	0.00010668	0.00824101	6/190	44/10877	0.00801345	2194/31/9524/47/6319/55902	6	3
GO:0006766	vitamin metabolic process	0.00011061	0.00831372	9/190	108/10877	0.00808416	56603/10840/2194/31/29968/5641/326625/55163/10327	9	3
GO:0051188	cofactor biosynthetic process	0.000151196	0.0110651	14/190	255/10877	0.0107596	2194/31/5230/9524/47/29968/79017/326625/55163/2023/3101/6319/55902/10327	14	3
GO:0009110	vitamin biosynthetic process	0.000179654	0.0128107	4/190	17/10877	0.0124569	29968/326625/55163/10327	4	3
GO:0071466	cellular response to xenobiotic stimulus	0.000232035	0.0161322	9/190	119/10877	0.0156868	56603/5176/1565/1036/6776/1869/4257/2326/2052	9	3
GO:0006767	water-soluble vitamin metabolic process	0.000273535	0.0181119	7/190	73/10877	0.0176118	10840/2194/31/29968/326625/55163/10327	7	3
GO:0006805	xenobiotic metabolic process	0.000273535	0.0181119	7/190	73/10877	0.0176118	56603/1565/1036/6776/4257/2326/2052	7	3
GO:0044282	small molecule catabolic process	0.0003126	0.0197802	16/190	341/10877	0.019234	56603/10840/1666/1632/1036/5230/216/27294/2023/3101/10327/55586/55862/9663/3033/18	16	3
GO:0042119	neutrophil activation	0.000312955	0.0197802	17/190	376/10877	0.019234	290/84061/3482/5284/47/10577/5478/2512/2040/6352/5004/2934/3101/1512/4257/6386/3916	17	3
GO:0035337	fatty-acyl-CoA metabolic process	0.000327218	0.0202221	5/190	35/10877	0.0196637	2194/31/9524/47/6319	5	3
GO:0006633	fatty acid biosynthetic process	0.000353295	0.021359	8/190	100/10877	0.0207692	2194/31/9524/47/3638/6319/55902/4257	8	3
GO:0036230	granulocyte activation	0.000364731	0.0215812	17/190	381/10877	0.0209853	290/84061/3482/5284/47/10577/5478/2512/2040/6352/5004/2934/3101/1512/4257/6386/3916	17	3
GO:0046365	monosaccharide catabolic process	0.00037369	0.0216507	6/190	55/10877	0.0210529	5230/216/27294/2023/3101/10327	6	3
GO:0002274	myeloid leukocyte activation	0.00049517	0.0281034	19/190	465/10877	0.0273274	1191/290/84061/3482/5284/47/10577/5478/2512/2040/6352/5004/2934/3101/1512/4257/6386/3916/6812	19	3
GO:0072330	monocarboxylic acid biosynthetic process	0.000538303	0.0299404	12/190	223/10877	0.0291137	2194/31/5230/9524/47/3638/2023/3101/6319/55902/4257/18	12	3
GO:0072329	monocarboxylic acid catabolic process	0.000712321	0.0384882	8/190	111/10877	0.0374255	56603/1666/1632/10327/55862/9663/3033/18	8	3
GO:0043312	neutrophil degranulation	0.000719665	0.0384882	16/190	368/10877	0.0374255	290/84061/3482/5284/47/10577/5478/2512/2040/5004/2934/3101/1512/4257/6386/3916	16	3
GO:0002283	neutrophil activation involved in immune response	0.000740896	0.0386386	16/190	369/10877	0.0375717	290/84061/3482/5284/47/10577/5478/2512/2040/5004/2934/3101/1512/4257/6386/3916	16	3
GO:0043299	leukocyte degranulation	0.000750265	0.0386386	17/190	406/10877	0.0375717	290/84061/3482/5284/47/10577/5478/2512/2040/5004/2934/3101/1512/4257/6386/3916/6812	17	3
GO:0002275	myeloid cell activation involved in immune response	0.000792439	0.0400686	17/190	408/10877	0.0389622	290/84061/3482/5284/47/10577/5478/2512/2040/5004/2934/3101/1512/4257/6386/3916/6812	17	3
GO:0002444	myeloid leukocyte mediated immunity	0.000956435	0.0474972	17/190	415/10877	0.0461857	290/84061/3482/5284/47/10577/5478/2512/2040/5004/2934/3101/1512/4257/6386/3916/6812	17	3
GO:1901570	fatty acid derivative biosynthetic process	0.000999497	0.0485278	6/190	66/10877	0.0471878	2194/31/9524/47/6319/4257	6	3
GO:0002446	neutrophil mediated immunity	0.00101209	0.0485278	16/190	380/10877	0.0471878	290/84061/3482/5284/47/10577/5478/2512/2040/5004/2934/3101/1512/4257/6386/3916	16	3
GO:0009108	coenzyme biosynthetic process	0.00105439	0.0496994	11/190	208/10877	0.0483271	2194/31/5230/9524/47/55163/2023/3101/6319/55902/10327	11	3
Gene set 22	GSE13528_AD_LIB_VS_FASTED_MC4R_N298_LIVER_DN								1
ID	Description	pvalue	p.adjust	GeneRatio	BgRatio	qvalue	geneID	Count	2
GO:0006614	SRP-dependent cotranslational protein targeting to membrane	8.85018e-26	2.07979e-22	26/189	86/10877	2.02529e-22	6193/6206/6232/6224/6156/3921/6125/6230/6134/6208/6231/6124/6132/6139/6223/6191/6168/11224/6233/6144/6141/6128/6235/6170/6205/6142	26	3
GO:0006613	cotranslational protein targeting to membrane	4.63124e-25	5.44171e-22	26/189	91/10877	5.29911e-22	6193/6206/6232/6224/6156/3921/6125/6230/6134/6208/6231/6124/6132/6139/6223/6191/6168/11224/6233/6144/6141/6128/6235/6170/6205/6142	26	3
GO:0045047	protein targeting to ER	2.17385e-24	1.49366e-21	26/189	96/10877	1.45452e-21	6193/6206/6232/6224/6156/3921/6125/6230/6134/6208/6231/6124/6132/6139/6223/6191/6168/11224/6233/6144/6141/6128/6235/6170/6205/6142	26	3
GO:0006413	translational initiation	2.5424e-24	1.49366e-21	32/189	172/10877	1.45452e-21	6193/6206/27335/6232/6224/57409/6156/3921/6125/6230/6134/6208/6231/6124/6132/6139/54505/6223/6191/51386/6168/11224/6233/6144/6141/6128/8666/6235/6170/6205/6142/28985	32	3
GO:0072599	establishment of protein localization to endoplasmic reticulum	6.98685e-24	3.28382e-21	26/189	100/10877	3.19777e-21	6193/6206/6232/6224/6156/3921/6125/6230/6134/6208/6231/6124/6132/6139/6223/6191/6168/11224/6233/6144/6141/6128/6235/6170/6205/6142	26	3
GO:0019080	viral gene expression	1.25326e-23	4.9086e-21	31/189	166/10877	4.77998e-21	6193/6206/6232/57122/6224/6156/3921/6125/6230/6134/6208/6231/6124/6132/6139/29969/6223/6191/51386/6168/11224/6233/6144/6141/6128/8666/6235/6170/6205/6142/28985	31	3
GO:0000184	nuclear-transcribed mRNA catabolic process, nonsense-mediated decay	7.94312e-23	2.66662e-20	26/189	109/10877	2.59674e-20	6193/6206/6232/6224/6156/3921/6125/6230/6134/6208/6231/6124/6132/6139/6223/6191/6168/11224/6233/6144/6141/6128/6235/6170/6205/6142	26	3
GO:0070972	protein localization to endoplasmic reticulum	2.78331e-21	8.17598e-19	26/189	124/10877	7.96174e-19	6193/6206/6232/6224/6156/3921/6125/6230/6134/6208/6231/6124/6132/6139/6223/6191/6168/11224/6233/6144/6141/6128/6235/6170/6205/6142	26	3
GO:0019083	viral transcription	3.76907e-21	9.84147e-19	28/189	153/10877	9.58359e-19	6193/6206/6232/57122/6224/6156/3921/6125/6230/6134/6208/6231/6124/6132/6139/29969/6223/6191/6168/11224/6233/6144/6141/6128/6235/6170/6205/6142	28	3
GO:0006612	protein targeting to membrane	6.38406e-19	1.50026e-16	26/189	152/10877	1.46094e-16	6193/6206/6232/6224/6156/3921/6125/6230/6134/6208/6231/6124/6132/6139/6223/6191/6168/11224/6233/6144/6141/6128/6235/6170/6205/6142	26	3
GO:0000956	nuclear-transcribed mRNA catabolic process	8.6723e-17	1.85272e-14	26/189	184/10877	1.80417e-14	6193/6206/6232/6224/6156/3921/6125/6230/6134/6208/6231/6124/6132/6139/6223/6191/6168/11224/6233/6144/6141/6128/6235/6170/6205/6142	26	3
GO:0006364	rRNA processing	9.0842e-15	1.77899e-12	26/189	222/10877	1.73237e-12	6193/6206/6232/6224/6156/3921/6125/6230/6134/6208/6231/6124/6132/6139/6223/6191/6168/11224/6233/6144/6141/6128/6235/6170/6205/6142	26	3
GO:0016072	rRNA metabolic process	1.82756e-14	3.30367e-12	27/189	249/10877	3.2171e-12	6193/6206/6232/6224/6156/3921/6125/6230/6134/6208/6231/6124/6132/6139/6223/6191/6168/11224/6233/6144/6141/6128/6235/6170/6205/6142/112495	27	3
GO:0006605	protein targeting	1.1507e-13	1.93153e-11	30/189	337/10877	1.88092e-11	6193/6206/6232/6224/6156/3921/6125/6230/6134/6208/6231/6124/6132/6139/9512/293/6223/6191/55733/6168/11224/6233/6144/6141/6128/6235/6170/6205/6142/10400	30	3
GO:0090150	establishment of protein localization to membrane	1.29999e-13	2.03665e-11	26/189	248/10877	1.98328e-11	6193/6206/6232/6224/6156/3921/6125/6230/6134/6208/6231/6124/6132/6139/6223/6191/6168/11224/6233/6144/6141/6128/6235/6170/6205/6142	26	3
GO:0042254	ribosome biogenesis	2.22929e-12	3.26297e-10	26/189	280/10877	3.17747e-10	6193/6206/6232/6224/6156/3921/6125/6230/6134/6208/6231/6124/6132/6139/6223/6191/6168/11224/6233/6144/6141/6128/6235/6170/6205/6142	26	3
GO:0072594	establishment of protein localization to organelle	2.36045e-12	3.26297e-10	32/189	431/10877	3.17747e-10	6193/6206/6232/57122/6224/6156/3921/6125/6230/6134/6208/6231/6124/6132/6139/9512/29969/293/6223/6191/55733/6168/11224/6233/6144/6141/6128/6235/6170/6205/6142/10400	32	3
GO:0006402	mRNA catabolic process	9.29288e-12	1.21324e-09	26/189	298/10877	1.18145e-09	6193/6206/6232/6224/6156/3921/6125/6230/6134/6208/6231/6124/6132/6139/6223/6191/6168/11224/6233/6144/6141/6128/6235/6170/6205/6142	26	3
GO:0034660	ncRNA metabolic process	1.68503e-11	2.02262e-09	32/189	464/10877	1.96962e-09	6193/6206/6232/23438/6224/6156/3921/6125/6230/6134/6208/6231/3028/6124/6132/80222/6139/6223/6191/161829/6168/11224/6233/6144/6141/6128/55152/6235/6170/6205/6142/112495	32	3
GO:0034470	ncRNA processing	1.72138e-11	2.02262e-09	27/189	331/10877	1.96962e-09	6193/6206/6232/6224/6156/3921/6125/6230/6134/6208/6231/3028/6124/6132/6139/6223/6191/6168/11224/6233/6144/6141/6128/6235/6170/6205/6142	27	3
GO:0006401	RNA catabolic process	4.95798e-11	5.54822e-09	26/189	321/10877	5.40284e-09	6193/6206/6232/6224/6156/3921/6125/6230/6134/6208/6231/6124/6132/6139/6223/6191/6168/11224/6233/6144/6141/6128/6235/6170/6205/6142	26	3
GO:0006635	fatty acid beta-oxidation	6.48987e-11	6.93236e-09	13/189	65/10877	6.7507e-09	5825/2110/37/1891/33/84129/3032/35/3030/30/10449/23417/1384	13	3
GO:0022613	ribonucleoprotein complex biogenesis	2.57581e-10	2.63181e-08	28/189	400/10877	2.56284e-08	6193/6206/6232/6224/6156/3921/6125/6230/6134/6208/6231/6124/6132/6139/6223/6191/54496/6168/11224/6233/6144/6141/6128/6235/6170/6205/6142/28985	28	3
GO:0002181	cytoplasmic translation	8.43615e-10	8.2604e-08	13/189	79/10877	8.04394e-08	6224/6156/6231/6124/6132/6139/6141/6128/6235/6170/1938/6142/28985	13	3
GO:0034655	nucleobase-containing compound catabolic process	2.25594e-09	2.12058e-07	30/189	500/10877	2.06501e-07	6193/6206/6232/57122/2592/6224/5211/2203/6156/3921/6125/6230/6134/6208/6231/6124/6132/6139/6223/6191/6168/11224/6233/6144/6141/6128/6235/6170/6205/6142	30	3
GO:0019395	fatty acid oxidation	2.50195e-09	2.26138e-07	13/189	86/10877	2.20212e-07	5825/2110/37/1891/33/84129/3032/35/3030/30/10449/23417/1384	13	3
GO:0034440	lipid oxidation	3.34827e-09	2.91424e-07	13/189	88/10877	2.83787e-07	5825/2110/37/1891/33/84129/3032/35/3030/30/10449/23417/1384	13	3
GO:0009062	fatty acid catabolic process	7.66996e-09	6.43729e-07	13/189	94/10877	6.2686e-07	5825/2110/37/1891/33/84129/3032/35/3030/30/10449/23417/1384	13	3
GO:0072657	protein localization to membrane	1.8111e-08	1.46761e-06	27/189	453/10877	1.42916e-06	6193/6206/6232/6224/6156/3921/6125/6230/6134/6208/6231/6124/6132/6139/6223/6191/145567/6168/11224/6233/6144/6141/6128/6235/6170/6205/6142	27	3
GO:0072329	monocarboxylic acid catabolic process	5.91013e-08	4.6296e-06	13/189	111/10877	4.50829e-06	5825/2110/37/1891/33/84129/3032/35/3030/30/10449/23417/1384	13	3
GO:0032787	monocarboxylic acid metabolic process	8.3401e-08	6.32233e-06	26/189	456/10877	6.15666e-06	25874/5825/2110/37/5091/1891/33/84129/51141/114883/57122/3032/35/3945/5211/2203/641371/3030/30/10449/5564/51660/335/10588/23417/1384	26	3
GO:0044242	cellular lipid catabolic process	1.22631e-07	9.0057e-06	15/189	161/10877	8.76972e-06	5825/2110/37/1891/33/84129/3032/35/3030/4258/30/10449/335/23417/1384	15	3
GO:0016054	organic acid catabolic process	3.43297e-07	2.37279e-05	17/189	224/10877	2.31061e-05	5825/2110/37/1891/33/84129/3032/35/3028/3030/30/10449/10588/138199/132789/23417/1384	17	3
GO:0046395	carboxylic acid catabolic process	3.43297e-07	2.37279e-05	17/189	224/10877	2.31061e-05	5825/2110/37/1891/33/84129/3032/35/3028/3030/30/10449/10588/138199/132789/23417/1384	17	3
GO:0016042	lipid catabolic process	7.17774e-07	4.81934e-05	17/189	236/10877	4.69305e-05	5825/2110/37/1891/33/84129/3032/35/3030/4258/30/10449/81579/335/51365/23417/1384	17	3
GO:0030258	lipid modification	1.5343e-06	0.000100156	16/189	222/10877	9.75312e-05	3931/5825/2110/37/1891/33/84129/3032/35/3030/30/10449/335/145567/23417/1384	16	3
GO:0044282	small molecule catabolic process	1.89776e-06	0.000120533	20/189	341/10877	0.000117375	5825/2110/37/1891/33/84129/3032/35/2592/5211/3028/3030/30/10449/10588/138199/64080/132789/23417/1384	20	3
GO:0042255	ribosome assembly	2.40809e-06	0.000148921	8/189	51/10877	0.000145019	6193/6232/3921/6125/6134/6208/6223/6128	8	3
GO:0000028	ribosomal small subunit assembly	3.91707e-06	0.000236029	5/189	15/10877	0.000229844	6193/6232/3921/6208/6223	5	3
GO:0033539	fatty acid beta-oxidation using acyl-CoA dehydrogenase	5.61747e-06	0.000330027	5/189	16/10877	0.000321379	2110/37/33/84129/35	5	3
GO:0006631	fatty acid metabolic process	7.05765e-06	0.000404524	17/189	279/10877	0.000393924	5825/2110/37/1891/33/84129/51141/3032/35/641371/3030/30/10449/5564/335/23417/1384	17	3
GO:0006732	coenzyme metabolic process	0.000431367	0.024136	15/189	318/10877	0.0235036	25874/3158/5091/57122/2350/3945/2593/5211/2203/641371/51660/10588/64080/23417/10400	15	3
GO:0051262	protein tetramerization	0.00044496	0.0243176	8/189	104/10877	0.0236803	158/33/3615/5211/10901/2203/3028/6223	8	3
GO:0008203	cholesterol metabolic process	0.000538751	0.0287742	8/189	107/10877	0.0280202	3931/3158/37/33/51141/10449/319/335	8	3
GO:0008202	steroid metabolic process	0.000625566	0.0326684	12/189	228/10877	0.0318124	3931/3158/37/33/51141/114883/10901/30/10449/319/335/64746	12	3
GO:0000038	very long-chain fatty acid metabolic process	0.000714638	0.0365087	4/189	24/10877	0.035552	5825/37/641371/30	4	3
GO:1902652	secondary alcohol metabolic process	0.000730193	0.0365097	8/189	112/10877	0.035553	3931/3158/37/33/51141/10449/319/335	8	3
GO:0045717	negative regulation of fatty acid biosynthetic process	0.00101198	0.0495448	3/189	12/10877	0.0482465	37/33/51141	3	3
Gene set 23	GSE13528_MC4R_D298_VS_MC4R_N298_AD_LIB_LIVER_UP								4
ID	Description	pvalue	p.adjust	GeneRatio	BgRatio	qvalue	geneID	Count	5
Gene set 24	GSE13528_MC4R_D298_VS_MC4R_N298_AD_LIB_LIVER_DN								4
ID	Description	pvalue	p.adjust	GeneRatio	BgRatio	qvalue	geneID	Count	5
GO:0003299	muscle hypertrophy in response to stress	3.66497e-05	0.0229183	4/112	19/10877	0.0229183	9682/4088/493/5530	4	6
GO:0014887	cardiac muscle adaptation	3.66497e-05	0.0229183	4/112	19/10877	0.0229183	9682/4088/493/5530	4	6
GO:0014898	cardiac muscle hypertrophy in response to stress	3.66497e-05	0.0229183	4/112	19/10877	0.0229183	9682/4088/493/5530	4	6
Gene set 25	GSE13528_AD_LIB_VS_FASTED_MC4R_D298_ADIPOSE_TISSUE_UP								1
ID	Description	pvalue	p.adjust	GeneRatio	BgRatio	qvalue	geneID	Count	2
GO:0051186	cofactor metabolic process	3.06671e-19	6.4217e-16	42/192	456/10877	6.1076e-16	2180/6513/84649/6319/230/79944/5095/2194/27010/4190/57017/5096/51629/1629/51660/4257/60481/137872/6472/56922/231/4191/2805/7001/7390/23474/6576/51022/84274/2235/5226/79071/51144/79877/84693/9054/4199/7923/128240/6888/47/5162	42	3
GO:0006732	coenzyme metabolic process	5.44205e-15	5.69782e-12	31/192	318/10877	5.41913e-12	2180/6513/84649/6319/230/5095/2194/27010/4190/57017/5096/1629/51660/60481/6472/56922/4191/6576/84274/5226/79071/51144/79877/84693/9054/4199/7923/128240/6888/47/5162	31	3
GO:0022900	electron transport chain	4.7971e-13	3.25982e-10	20/192	141/10877	3.10038e-10	8608/27294/57017/7384/1346/10975/6834/4705/4697/231/9377/4726/1329/51022/6391/4017/4706/3420/2108/4199	20	3
GO:0032787	monocarboxylic acid metabolic process	6.22697e-13	3.25982e-10	34/192	456/10877	3.10038e-10	2180/84649/6319/230/5095/2194/1892/2170/2879/5096/55268/1632/51660/4257/60481/56922/9380/3712/55347/4726/4706/51102/5226/10455/79071/51144/84693/51094/2108/4199/7923/1382/47/5162	34	3
GO:0006790	sulfur compound metabolic process	1.27757e-12	5.35047e-10	26/192	269/10877	5.08877e-10	6487/2180/84649/6319/5095/2194/27010/5096/1629/4060/51660/4257/60481/1468/56922/23474/6576/51022/10380/79071/51144/84693/9054/7923/47/5162	26	3
GO:0006631	fatty acid metabolic process	2.97225e-12	1.03731e-09	26/192	279/10877	9.86578e-10	2180/84649/6319/5095/2194/1892/2170/2879/5096/55268/1632/4257/60481/3712/4726/4706/51102/10455/79071/51144/84693/51094/2108/7923/47/5162	26	3
GO:0006091	generation of precursor metabolites and energy	9.36979e-12	2.80291e-09	30/192	393/10877	2.66581e-09	230/8608/2632/27294/4190/57017/7384/1346/10975/6834/4705/509/498/4697/231/4191/9377/4726/1329/51022/6391/4017/4706/3420/2235/50/10105/2108/4199/5162	30	3
GO:0006637	acyl-CoA metabolic process	9.64672e-11	2.24447e-08	14/192	80/10877	2.13469e-08	2180/84649/6319/2194/1629/51660/60481/6576/79071/51144/84693/7923/47/5162	14	3
GO:0035383	thioester metabolic process	9.64672e-11	2.24447e-08	14/192	80/10877	2.13469e-08	2180/84649/6319/2194/1629/51660/60481/6576/79071/51144/84693/7923/47/5162	14	3
GO:0035384	thioester biosynthetic process	1.79679e-10	3.42044e-08	11/192	44/10877	3.25314e-08	2180/6319/2194/51660/60481/6576/79071/51144/7923/47/5162	11	3
GO:0071616	acyl-CoA biosynthetic process	1.79679e-10	3.42044e-08	11/192	44/10877	3.25314e-08	2180/6319/2194/51660/60481/6576/79071/51144/7923/47/5162	11	3
GO:0035337	fatty-acyl-CoA metabolic process	2.90769e-10	5.07393e-08	10/192	35/10877	4.82575e-08	2180/84649/6319/2194/60481/6576/79071/51144/7923/47	10	3
GO:0046949	fatty-acyl-CoA biosynthetic process	4.91459e-10	7.91627e-08	9/192	27/10877	7.52907e-08	2180/6319/2194/60481/6576/79071/51144/7923/47	9	3
GO:0045333	cellular respiration	7.00038e-10	9.79746e-08	17/192	146/10877	9.31825e-08	4190/57017/7384/10975/6834/4705/4697/4191/9377/4726/1329/6391/4706/3420/50/2108/5162	17	3
GO:0051188	cofactor biosynthetic process	7.01824e-10	9.79746e-08	22/192	255/10877	9.31825e-08	2180/6319/230/2194/27010/57017/51629/51660/60481/7390/6576/84274/2235/79071/51144/79877/9054/4199/7923/128240/47/5162	22	3
GO:0016054	organic acid catabolic process	2.42033e-09	2.98128e-07	20/192	224/10877	2.83546e-07	5095/1892/5096/23464/1629/55268/1632/137872/56922/2875/594/2805/3712/55347/4706/51102/10455/84693/2108/27034	20	3
GO:0046395	carboxylic acid catabolic process	2.42033e-09	2.98128e-07	20/192	224/10877	2.83546e-07	5095/1892/5096/23464/1629/55268/1632/137872/56922/2875/594/2805/3712/55347/4706/51102/10455/84693/2108/27034	20	3
GO:0009108	coenzyme biosynthetic process	4.25344e-09	4.94817e-07	19/192	208/10877	4.70615e-07	2180/6319/230/2194/27010/57017/51660/60481/6576/84274/79071/51144/79877/9054/4199/7923/128240/47/5162	19	3
GO:0006119	oxidative phosphorylation	5.80328e-09	6.39583e-07	14/192	108/10877	6.083e-07	57017/7384/10975/6834/4705/509/498/4697/9377/4726/1329/6391/4706/10105	14	3
GO:0016051	carbohydrate biosynthetic process	2.49489e-08	2.53677e-06	16/192	162/10877	2.4127e-06	6513/84649/230/57452/2632/4190/3973/1468/231/4191/2805/6576/4706/5226/1950/6888	16	3
GO:0044272	sulfur compound biosynthetic process	2.54404e-08	2.53677e-06	15/192	141/10877	2.4127e-06	6487/2180/6319/2194/27010/4060/51660/4257/60481/6576/79071/51144/7923/47/5162	15	3
GO:0009060	aerobic respiration	3.39983e-08	3.23602e-06	11/192	70/10877	3.07774e-06	4190/7384/6834/4697/4191/9377/1329/6391/3420/50/5162	11	3
GO:0015980	energy derivation by oxidation of organic compounds	4.33679e-08	3.94837e-06	18/192	215/10877	3.75525e-06	2632/4190/57017/7384/10975/6834/4705/4697/4191/9377/4726/1329/6391/4706/3420/50/2108/5162	18	3
GO:0044282	small molecule catabolic process	1.4296e-07	1.24733e-05	22/192	341/10877	1.18632e-05	230/5095/27294/1892/5096/23464/1629/55268/1632/137872/56922/2875/594/2805/3712/55347/4706/51102/10455/84693/2108/27034	22	3
GO:1901570	fatty acid derivative biosynthetic process	2.07892e-07	1.7413e-05	10/192	66/10877	1.65613e-05	2180/6319/2194/4257/60481/6576/79071/51144/7923/47	10	3
GO:0019395	fatty acid oxidation	3.00661e-07	2.42148e-05	11/192	86/10877	2.30304e-05	84649/1892/2170/55268/1632/3712/4706/51102/10455/51094/2108	11	3
GO:0046364	monosaccharide biosynthetic process	3.20028e-07	2.482e-05	10/192	69/10877	2.3606e-05	84649/230/4190/1468/231/4191/2805/6576/5226/6888	10	3
GO:0034440	lipid oxidation	3.81456e-07	2.85275e-05	11/192	88/10877	2.71321e-05	84649/1892/2170/55268/1632/3712/4706/51102/10455/51094/2108	11	3
GO:0022904	respiratory electron transport chain	5.38658e-07	3.88948e-05	11/192	91/10877	3.69924e-05	57017/7384/10975/4705/4697/9377/4726/1329/6391/4706/2108	11	3
GO:1901568	fatty acid derivative metabolic process	6.76351e-07	4.72093e-05	12/192	113/10877	4.49002e-05	2180/84649/6319/2194/2879/4257/60481/6576/79071/51144/7923/47	12	3
GO:0009062	fatty acid catabolic process	7.50488e-07	5.06943e-05	11/192	94/10877	4.82147e-05	5095/1892/5096/55268/1632/3712/4706/51102/10455/84693/2108	11	3
GO:0042775	mitochondrial ATP synthesis coupled electron transport	8.07187e-07	5.28203e-05	10/192	76/10877	5.02368e-05	57017/7384/10975/4705/4697/9377/4726/1329/6391/4706	10	3
GO:0042773	ATP synthesis coupled electron transport	9.13591e-07	5.79715e-05	10/192	77/10877	5.5136e-05	57017/7384/10975/4705/4697/9377/4726/1329/6391/4706	10	3
GO:0006101	citrate metabolic process	1.1088e-06	6.8289e-05	7/192	32/10877	6.49488e-05	4190/4191/6391/3420/50/47/5162	7	3
GO:0006633	fatty acid biosynthetic process	1.40414e-06	8.40076e-05	11/192	100/10877	7.98986e-05	6319/2194/4257/60481/4706/51102/79071/51144/51094/7923/47	11	3
GO:0019693	ribose phosphate metabolic process	2.07112e-06	0.000119876	23/192	431/10877	0.000114012	230/57017/7384/10975/6834/3973/4705/509/498/4697/8654/9377/4726/1329/6391/10380/4706/5226/10105/79877/9054/6888/47	23	3
GO:0072350	tricarboxylic acid metabolic process	2.11815e-06	0.000119876	7/192	35/10877	0.000114012	4190/4191/6391/3420/50/47/5162	7	3
GO:0072329	monocarboxylic acid catabolic process	3.96354e-06	0.000218412	11/192	111/10877	0.000207729	5095/1892/5096/55268/1632/3712/4706/51102/10455/84693/2108	11	3
GO:0005996	monosaccharide metabolic process	5.96935e-06	0.000320508	15/192	215/10877	0.000304831	6513/84649/230/27294/4190/1468/231/4191/2805/55347/6576/5226/51094/6888/5162	15	3
GO:0006099	tricarboxylic acid cycle	7.62658e-06	0.000399251	6/192	28/10877	0.000379723	4190/4191/6391/3420/50/5162	6	3
GO:0009150	purine ribonucleotide metabolic process	9.25529e-06	0.000472697	21/192	405/10877	0.000449577	230/57017/7384/10975/6834/3973/4705/509/498/4697/8654/9377/4726/1329/6391/10380/4706/10105/79877/9054/47	21	3
GO:0009205	purine ribonucleoside triphosphate metabolic process	1.01601e-05	0.000506555	16/192	253/10877	0.000481779	230/57017/7384/10975/6834/4705/509/498/4697/9377/4726/1329/6391/4706/10105/9054	16	3
GO:0016053	organic acid biosynthetic process	1.1871e-05	0.000564953	18/192	316/10877	0.00053732	6319/230/2194/4257/60481/6472/2875/2805/7390/4706/5723/51102/79071/1950/51144/51094/7923/47	18	3
GO:0046394	carboxylic acid biosynthetic process	1.1871e-05	0.000564953	18/192	316/10877	0.00053732	6319/230/2194/4257/60481/6472/2875/2805/7390/4706/5723/51102/79071/1950/51144/51094/7923/47	18	3
GO:0046034	ATP metabolic process	1.34649e-05	0.000599855	15/192	230/10877	0.000570515	230/57017/7384/10975/6834/4705/509/498/4697/9377/4726/1329/6391/4706/10105	15	3
GO:0009144	purine nucleoside triphosphate metabolic process	1.36304e-05	0.000599855	16/192	259/10877	0.000570515	230/57017/7384/10975/6834/4705/509/498/4697/9377/4726/1329/6391/4706/10105/9054	16	3
GO:0009199	ribonucleoside triphosphate metabolic process	1.36304e-05	0.000599855	16/192	259/10877	0.000570515	230/57017/7384/10975/6834/4705/509/498/4697/9377/4726/1329/6391/4706/10105/9054	16	3
GO:0019319	hexose biosynthetic process	1.37503e-05	0.000599855	8/192	63/10877	0.000570515	84649/230/4190/1468/231/4191/2805/6576	8	3
GO:0009083	branched-chain amino acid catabolic process	1.54698e-05	0.000636442	5/192	19/10877	0.000605312	1629/56922/594/3712/27034	5	3
GO:0006163	purine nucleotide metabolic process	1.55007e-05	0.000636442	21/192	419/10877	0.000605312	230/57017/7384/10975/6834/3973/4705/509/498/4697/8654/9377/4726/1329/6391/10380/4706/10105/79877/9054/47	21	3
GO:0009259	ribonucleotide metabolic process	1.55007e-05	0.000636442	21/192	419/10877	0.000605312	230/57017/7384/10975/6834/3973/4705/509/498/4697/8654/9377/4726/1329/6391/10380/4706/10105/79877/9054/47	21	3
GO:0005975	carbohydrate metabolic process	1.62563e-05	0.000639665	22/192	454/10877	0.000608377	6487/6513/84649/230/57452/2632/27294/4190/3973/1468/231/4191/2805/55347/6576/4706/5226/1950/51094/4199/6888/5162	22	3
GO:0009126	purine nucleoside monophosphate metabolic process	1.64956e-05	0.000639665	16/192	263/10877	0.000608377	230/57017/7384/10975/6834/64077/4705/509/498/4697/9377/4726/1329/6391/4706/10105	16	3
GO:0009167	purine ribonucleoside monophosphate metabolic process	1.64956e-05	0.000639665	16/192	263/10877	0.000608377	230/57017/7384/10975/6834/64077/4705/509/498/4697/9377/4726/1329/6391/4706/10105	16	3
GO:0006635	fatty acid beta-oxidation	1.73885e-05	0.000662028	8/192	65/10877	0.000629647	1892/55268/1632/3712/4706/51102/10455/2108	8	3
GO:0043648	dicarboxylic acid metabolic process	1.78677e-05	0.000668126	9/192	85/10877	0.000635447	79944/4190/137872/6472/9380/4191/2805/4199/47	9	3
GO:0044242	cellular lipid catabolic process	2.72306e-05	0.00098662	12/192	161/10877	0.000938363	5095/1892/2170/5096/55268/1632/3712/4706/51102/10455/84693/2108	12	3
GO:0009161	ribonucleoside monophosphate metabolic process	2.73276e-05	0.00098662	16/192	274/10877	0.000938363	230/57017/7384/10975/6834/64077/4705/509/498/4697/9377/4726/1329/6391/4706/10105	16	3
GO:0006107	oxaloacetate metabolic process	2.8183e-05	0.00100026	4/192	11/10877	0.000951334	4190/4191/2805/47	4	3
GO:0009141	nucleoside triphosphate metabolic process	2.98648e-05	0.00104228	16/192	276/10877	0.000991301	230/57017/7384/10975/6834/4705/509/498/4697/9377/4726/1329/6391/4706/10105/9054	16	3
GO:0009081	branched-chain amino acid metabolic process	3.35571e-05	0.00115194	5/192	22/10877	0.0010956	1629/56922/594/3712/27034	5	3
GO:0072521	purine-containing compound metabolic process	3.66468e-05	0.00123772	21/192	444/10877	0.00117718	230/57017/7384/10975/6834/3973/4705/509/498/4697/8654/9377/4726/1329/6391/10380/4706/10105/79877/9054/47	21	3
GO:0009123	nucleoside monophosphate metabolic process	4.22268e-05	0.00138294	16/192	284/10877	0.0013153	230/57017/7384/10975/6834/64077/4705/509/498/4697/9377/4726/1329/6391/4706/10105	16	3
GO:0035336	long-chain fatty-acyl-CoA metabolic process	4.22675e-05	0.00138294	5/192	23/10877	0.0013153	2180/84649/60481/79071/51144	5	3
GO:0009063	cellular amino acid catabolic process	4.38181e-05	0.00141162	9/192	95/10877	0.00134257	23464/1629/137872/56922/2875/594/2805/3712/27034	9	3
GO:0006094	gluconeogenesis	8.38204e-05	0.00265939	7/192	60/10877	0.00252932	84649/230/4190/1468/4191/2805/6576	7	3
GO:0016999	antibiotic metabolic process	8.94052e-05	0.00279424	9/192	104/10877	0.00265757	4190/231/4191/7001/6391/3420/50/47/5162	9	3
GO:0006733	oxidoreduction coenzyme metabolic process	0.000116002	0.00357217	11/192	159/10877	0.00339745	230/4190/57017/51660/4191/84274/5226/4199/128240/6888/5162	11	3
GO:0046890	regulation of lipid biosynthetic process	0.000119615	0.00363007	10/192	133/10877	0.00345251	84649/6319/2194/2170/60481/2224/1595/94101/79071/51094	10	3
GO:0035338	long-chain fatty-acyl-CoA biosynthetic process	0.000145024	0.00433829	4/192	16/10877	0.0041261	2180/60481/79071/51144	4	3
GO:0030258	lipid modification	0.000153258	0.00452003	13/192	222/10877	0.00429895	84649/1892/2170/55268/1632/3712/10380/4706/51102/10455/1950/51094/2108	13	3
GO:0046165	alcohol biosynthetic process	0.000158417	0.0046073	9/192	112/10877	0.00438195	6319/2194/3973/231/2224/2805/1595/79071/47	9	3
GO:0090181	regulation of cholesterol metabolic process	0.000185293	0.00531513	6/192	48/10877	0.00505516	84649/6319/2194/2224/1595/79071	6	3
GO:1902930	regulation of alcohol biosynthetic process	0.000260269	0.00736492	6/192	51/10877	0.00700469	6319/2194/3973/2224/1595/79071	6	3
GO:0006767	water-soluble vitamin metabolic process	0.00029157	0.00814063	7/192	73/10877	0.00774246	6513/5095/2194/27010/5096/6472/56922	7	3
GO:0006839	mitochondrial transport	0.000524528	0.0144521	13/192	252/10877	0.0137453	55972/51629/51660/1468/509/498/293/1329/6576/4836/10245/10105/4580	13	3
GO:0045540	regulation of cholesterol biosynthetic process	0.000575264	0.0156442	5/192	39/10877	0.014879	6319/2194/2224/1595/79071	5	3
GO:0072330	monocarboxylic acid biosynthetic process	0.000591121	0.0158693	12/192	223/10877	0.0150931	6319/230/2194/4257/60481/4706/51102/79071/51144/51094/7923/47	12	3
GO:0006695	cholesterol biosynthetic process	0.00063449	0.016771	6/192	60/10877	0.0159507	6319/2194/2224/1595/79071/47	6	3
GO:1901606	alpha-amino acid catabolic process	0.000640727	0.016771	7/192	83/10877	0.0159507	23464/137872/56922/2875/2805/3712/27034	7	3
GO:0006120	mitochondrial electron transport, NADH to ubiquinone	0.000727709	0.0188126	5/192	41/10877	0.0178925	57017/4705/4697/4726/4706	5	3
GO:1902653	secondary alcohol biosynthetic process	0.000756736	0.0191266	6/192	62/10877	0.0181911	6319/2194/2224/1595/79071/47	6	3
GO:0031365	N-terminal protein amino acid modification	0.000758122	0.0191266	4/192	24/10877	0.0181911	254042/8260/4836/79903	4	3
GO:0006694	steroid biosynthetic process	0.000962504	0.023682	9/192	143/10877	0.0225237	6319/2194/231/2224/1595/79071/51144/7923/47	9	3
GO:1902600	proton transmembrane transport	0.000962683	0.023682	8/192	115/10877	0.0225237	1346/6834/509/498/4697/9377/1329/10105	8	3
GO:0016042	lipid catabolic process	0.000972615	0.023682	12/192	236/10877	0.0225237	5095/1892/2170/5096/55268/1632/3712/4706/51102/10455/84693/2108	12	3
GO:0019362	pyridine nucleotide metabolic process	0.00101133	0.024065	9/192	144/10877	0.022888	230/4190/51660/4191/5226/4199/128240/6888/5162	9	3
GO:0046496	nicotinamide nucleotide metabolic process	0.00101133	0.024065	9/192	144/10877	0.022888	230/4190/51660/4191/5226/4199/128240/6888/5162	9	3
GO:0016126	sterol biosynthetic process	0.0010552	0.0248269	6/192	66/10877	0.0236126	6319/2194/2224/1595/79071/47	6	3
GO:0072524	pyridine-containing compound metabolic process	0.00128651	0.0299329	9/192	149/10877	0.0284688	230/4190/51660/4191/5226/4199/128240/6888/5162	9	3
GO:0046459	short-chain fatty acid metabolic process	0.00135916	0.0312757	3/192	13/10877	0.0297459	5095/5096/84693	3	3
GO:0006006	glucose metabolic process	0.00154768	0.0352266	9/192	153/10877	0.0335036	84649/230/4190/1468/4191/2805/6576/51094/5162	9	3
GO:0019321	pentose metabolic process	0.00170748	0.0384458	3/192	14/10877	0.0365654	27294/5226/6888	3	3
GO:0006084	acetyl-CoA metabolic process	0.00180028	0.0396819	4/192	30/10877	0.0377409	2194/51660/47/5162	4	3
GO:0006739	NADP metabolic process	0.00180028	0.0396819	4/192	30/10877	0.0377409	5226/4199/128240/6888	4	3
GO:0019318	hexose metabolic process	0.00183332	0.0399892	10/192	188/10877	0.0380333	84649/230/4190/1468/231/4191/2805/6576/51094/5162	10	3
Gene set 26	GSE13528_AD_LIB_VS_FASTED_MC4R_D298_ADIPOSE_TISSUE_DN								1
ID	Description	pvalue	p.adjust	GeneRatio	BgRatio	qvalue	geneID	Count	2
Gene set 27	GSE13528_AD_LIB_VS_FASTED_MC4R_N298_ADIPOSE_TISSUE_UP								4
ID	Description	pvalue	p.adjust	GeneRatio	BgRatio	qvalue	geneID	Count	5
GO:0051186	cofactor metabolic process	1.66459e-10	3.57387e-07	30/186	456/10877	3.33619e-07	6319/51144/2194/6888/79071/25874/84649/2023/4190/7001/47/230/6513/5096/57017/10400/51629/6576/11315/2644/2954/7923/644/23474/5223/9524/1937/3029/4199/26873	30	6
GO:0032787	monocarboxylic acid metabolic process	7.73043e-10	7.52338e-07	29/186	456/10877	7.02302e-07	6319/51144/1632/1892/2194/79071/25874/84649/2879/2023/47/55825/230/5096/2108/4706/2170/1462/11315/5947/10478/7923/4051/5223/1666/9524/3029/4199/112817	29	6
GO:0006790	sulfur compound metabolic process	1.05124e-09	7.52338e-07	22/186	269/10877	7.02302e-07	6319/51144/2194/79071/25874/84649/47/5096/10400/6576/10380/1462/11315/55256/2954/7923/23474/4060/9524/1937/3029/26873	22	6
GO:0035337	fatty-acyl-CoA metabolic process	4.95869e-09	2.66158e-06	9/186	35/10877	2.48457e-06	6319/51144/2194/79071/84649/47/6576/7923/9524	9	6
GO:0046949	fatty-acyl-CoA biosynthetic process	1.05768e-08	4.54167e-06	8/186	27/10877	4.23962e-06	6319/51144/2194/79071/47/6576/7923/9524	8	6
GO:0044272	sulfur compound biosynthetic process	1.65693e-08	5.92906e-06	15/186	141/10877	5.53474e-06	6319/51144/2194/79071/25874/47/6576/1462/55256/2954/7923/4060/9524/3029/26873	15	6
GO:0006119	oxidative phosphorylation	3.50594e-08	1.04021e-05	13/186	108/10877	9.71028e-06	57017/509/498/4706/6391/7384/7386/11315/54949/1329/4705/506/6392	13	6
GO:0035384	thioester biosynthetic process	4.36045e-08	1.04021e-05	9/186	44/10877	9.71028e-06	6319/51144/2194/79071/25874/47/6576/7923/9524	9	6
GO:0071616	acyl-CoA biosynthetic process	4.36045e-08	1.04021e-05	9/186	44/10877	9.71028e-06	6319/51144/2194/79071/25874/47/6576/7923/9524	9	6
GO:0006091	generation of precursor metabolites and energy	5.64365e-08	1.21169e-05	24/186	393/10877	1.13111e-05	2023/4190/230/57017/2108/509/498/4706/3953/6391/7384/7386/11315/50/2632/54949/8974/1329/4705/5223/1346/506/4199/6392	24	6
GO:0016053	organic acid biosynthetic process	9.88442e-08	1.76849e-05	21/186	316/10877	1.65087e-05	6319/51144/2194/79071/2023/47/55825/230/4706/1462/11315/55256/5947/7923/5723/435/5223/9524/1950/112817/1213	21	6
GO:0046394	carboxylic acid biosynthetic process	9.88442e-08	1.76849e-05	21/186	316/10877	1.65087e-05	6319/51144/2194/79071/2023/47/55825/230/4706/1462/11315/55256/5947/7923/5723/435/5223/9524/1950/112817/1213	21	6
GO:0022900	electron transport chain	1.21612e-07	2.00847e-05	14/186	141/10877	1.87489e-05	57017/2108/4706/6391/7384/7386/11315/54949/8974/1329/4705/1346/4199/6392	14	6
GO:0006631	fatty acid metabolic process	2.87053e-07	4.40216e-05	19/186	279/10877	4.10939e-05	6319/51144/1632/1892/2194/79071/84649/2879/47/55825/5096/2108/4706/2170/10478/7923/4051/1666/9524	19	6
GO:0009123	nucleoside monophosphate metabolic process	3.77673e-07	5.02179e-05	19/186	284/10877	4.68781e-05	204/2023/230/57017/509/1841/498/4706/10059/6391/7384/7386/11315/54949/1329/4705/5223/506/6392	19	6
GO:0022904	respiratory electron transport chain	3.91942e-07	5.02179e-05	11/186	91/10877	4.68781e-05	57017/2108/4706/6391/7384/7386/11315/54949/1329/4705/6392	11	6
GO:0046034	ATP metabolic process	3.97627e-07	5.02179e-05	17/186	230/10877	4.68781e-05	2023/230/57017/509/498/4706/10059/6391/7384/7386/11315/54949/1329/4705/5223/506/6392	17	6
GO:0006732	coenzyme metabolic process	4.92898e-07	5.87918e-05	20/186	318/10877	5.48818e-05	6319/51144/2194/6888/79071/25874/84649/2023/4190/47/230/6513/5096/57017/10400/6576/7923/5223/9524/4199	20	6
GO:0009126	purine nucleoside monophosphate metabolic process	5.58156e-07	5.99181e-05	18/186	263/10877	5.59331e-05	204/2023/230/57017/509/498/4706/10059/6391/7384/7386/11315/54949/1329/4705/5223/506/6392	18	6
GO:0009167	purine ribonucleoside monophosphate metabolic process	5.58156e-07	5.99181e-05	18/186	263/10877	5.59331e-05	204/2023/230/57017/509/498/4706/10059/6391/7384/7386/11315/54949/1329/4705/5223/506/6392	18	6
GO:0042775	mitochondrial ATP synthesis coupled electron transport	6.02848e-07	6.16341e-05	10/186	76/10877	5.7535e-05	57017/4706/6391/7384/7386/11315/54949/1329/4705/6392	10	6
GO:0016051	carbohydrate biosynthetic process	6.7892e-07	6.37248e-05	14/186	162/10877	5.94866e-05	6888/84649/2023/4190/9526/230/6513/6576/4706/3953/2632/5223/1950/1213	14	6
GO:0042773	ATP synthesis coupled electron transport	6.82659e-07	6.37248e-05	10/186	77/10877	5.94866e-05	57017/4706/6391/7384/7386/11315/54949/1329/4705/6392	10	6
GO:0006637	acyl-CoA metabolic process	9.80171e-07	8.38185e-05	10/186	80/10877	7.8244e-05	6319/51144/2194/79071/25874/84649/47/6576/7923/9524	10	6
GO:0035383	thioester metabolic process	9.80171e-07	8.38185e-05	10/186	80/10877	7.8244e-05	6319/51144/2194/79071/25874/84649/47/6576/7923/9524	10	6
GO:0009161	ribonucleoside monophosphate metabolic process	1.01504e-06	8.38185e-05	18/186	274/10877	7.8244e-05	204/2023/230/57017/509/498/4706/10059/6391/7384/7386/11315/54949/1329/4705/5223/506/6392	18	6
GO:0009141	nucleoside triphosphate metabolic process	1.12778e-06	8.96795e-05	18/186	276/10877	8.37152e-05	2023/230/57017/509/1841/498/4706/10059/6391/7384/7386/11315/54949/1329/4705/5223/506/6392	18	6
GO:0045333	cellular respiration	1.2264e-06	9.40383e-05	13/186	146/10877	8.77842e-05	4190/57017/2108/4706/6391/7384/7386/11315/50/54949/1329/4705/6392	13	6
GO:0072330	monocarboxylic acid biosynthetic process	1.3164e-06	9.74589e-05	16/186	223/10877	9.09772e-05	6319/51144/2194/79071/2023/47/55825/230/4706/1462/11315/5947/7923/5223/9524/112817	16	6
GO:0009205	purine ribonucleoside triphosphate metabolic process	1.509e-06	0.000107994	17/186	253/10877	0.000100812	2023/230/57017/509/498/4706/10059/6391/7384/7386/11315/54949/1329/4705/5223/506/6392	17	6
GO:0051188	cofactor biosynthetic process	1.68183e-06	0.000116481	17/186	255/10877	0.000108734	6319/51144/2194/79071/25874/2023/47/230/57017/51629/6576/7923/5223/9524/3029/4199/26873	17	6
GO:0009144	purine nucleoside triphosphate metabolic process	2.08221e-06	0.00013547	17/186	259/10877	0.000126461	2023/230/57017/509/498/4706/10059/6391/7384/7386/11315/54949/1329/4705/5223/506/6392	17	6
GO:0009199	ribonucleoside triphosphate metabolic process	2.08221e-06	0.00013547	17/186	259/10877	0.000126461	2023/230/57017/509/498/4706/10059/6391/7384/7386/11315/54949/1329/4705/5223/506/6392	17	6
GO:1901568	fatty acid derivative metabolic process	3.47447e-06	0.000219402	11/186	113/10877	0.000204811	6319/51144/2194/79071/84649/2879/47/6576/7923/4051/9524	11	6
GO:0015980	energy derivation by oxidation of organic compounds	4.04037e-06	0.000247848	15/186	215/10877	0.000231364	4190/57017/2108/4706/3953/6391/7384/7386/11315/50/2632/54949/1329/4705/6392	15	6
GO:0019693	ribose phosphate metabolic process	4.26525e-06	0.000254375	22/186	431/10877	0.000237457	6888/204/2023/47/230/57017/509/10380/498/4706/10059/6391/7384/7386/11315/54949/1329/8654/4705/5223/506/6392	22	6
GO:0009150	purine ribonucleotide metabolic process	5.61927e-06	0.000326069	21/186	405/10877	0.000304384	204/2023/47/230/57017/509/10380/498/4706/10059/6391/7384/7386/11315/54949/1329/8654/4705/5223/506/6392	21	6
GO:0006839	mitochondrial transport	6.44413e-06	0.000364094	16/186	252/10877	0.000339879	25874/293/63933/10456/10245/26517/10400/509/8655/51629/6576/4836/498/10478/1329/506	16	6
GO:0072521	purine-containing compound metabolic process	6.8702e-06	0.000378213	22/186	444/10877	0.00035306	204/2023/47/230/57017/10400/509/10380/498/4706/10059/6391/7384/7386/11315/54949/1329/8654/4705/5223/506/6392	22	6
GO:1990542	mitochondrial transmembrane transport	7.56585e-06	0.000406097	9/186	79/10877	0.000379089	25874/63933/10245/26517/509/6576/498/1329/506	9	6
GO:0006163	purine nucleotide metabolic process	9.48163e-06	0.000484692	21/186	419/10877	0.000452457	204/2023/47/230/57017/509/10380/498/4706/10059/6391/7384/7386/11315/54949/1329/8654/4705/5223/506/6392	21	6
GO:0009259	ribonucleotide metabolic process	9.48163e-06	0.000484692	21/186	419/10877	0.000452457	204/2023/47/230/57017/509/10380/498/4706/10059/6391/7384/7386/11315/54949/1329/8654/4705/5223/506/6392	21	6
GO:0009108	coenzyme biosynthetic process	1.28976e-05	0.000643979	14/186	208/10877	0.00060115	6319/51144/2194/79071/25874/2023/47/230/57017/6576/7923/5223/9524/4199	14	6
GO:0006101	citrate metabolic process	1.44386e-05	0.000704539	6/186	32/10877	0.000657682	4190/47/6391/50/54949/6392	6	6
GO:0019395	fatty acid oxidation	1.52542e-05	0.000722667	9/186	86/10877	0.000674605	1632/1892/84649/55825/2108/4706/2170/10478/1666	9	6
GO:1901570	fatty acid derivative biosynthetic process	1.54833e-05	0.000722667	8/186	66/10877	0.000674605	6319/51144/2194/79071/47/6576/7923/9524	8	6
GO:0034440	lipid oxidation	1.84046e-05	0.00084074	9/186	88/10877	0.000784825	1632/1892/84649/55825/2108/4706/2170/10478/1666	9	6
GO:0072329	monocarboxylic acid catabolic process	1.94144e-05	0.00086839	10/186	111/10877	0.000810637	1632/1892/55825/5096/2108/4706/10478/4051/1666/112817	10	6
GO:0046364	monosaccharide biosynthetic process	2.1577e-05	0.000945426	8/186	69/10877	0.000882549	6888/84649/2023/4190/230/6576/3953/5223	8	6
GO:0072350	tricarboxylic acid metabolic process	2.47834e-05	0.0010642	6/186	35/10877	0.000993422	4190/47/6391/50/54949/6392	6	6
GO:0009062	fatty acid catabolic process	3.13777e-05	0.00132094	9/186	94/10877	0.00123309	1632/1892/55825/5096/2108/4706/10478/4051/1666	9	6
GO:0006633	fatty acid biosynthetic process	5.13909e-05	0.00212185	9/186	100/10877	0.00198073	6319/51144/2194/79071/47/55825/4706/7923/9524	9	6
GO:0006520	cellular amino acid metabolic process	6.49422e-05	0.00263077	16/186	304/10877	0.00245581	5184/594/10400/79587/5033/11315/55256/2954/5723/435/95/670/4946/112817/3028/283459	16	6
GO:0006094	gluconeogenesis	6.8615e-05	0.00272808	7/186	60/10877	0.00254665	84649/2023/4190/230/6576/3953/5223	7	6
GO:0006749	glutathione metabolic process	7.25242e-05	0.00283108	6/186	42/10877	0.0026428	11315/2954/23474/1937/3029/26873	6	6
GO:0044282	small molecule catabolic process	7.49571e-05	0.0028738	17/186	341/10877	0.00268268	1632/1892/594/2023/55825/230/5096/2108/4706/10478/2954/4051/5223/1666/3029/112817/3028	17	6
GO:0007005	mitochondrion organization	9.10986e-05	0.00343138	20/186	452/10877	0.00320317	293/10456/65991/10245/26517/10400/509/8655/28958/4836/498/4706/10059/11315/54949/7416/4705/506/26073/3028	20	6
GO:0019319	hexose biosynthetic process	9.41458e-05	0.00348502	7/186	63/10877	0.00325324	84649/2023/4190/230/6576/3953/5223	7	6
GO:0006099	tricarboxylic acid cycle	9.89253e-05	0.00359988	5/186	28/10877	0.00336046	4190/6391/50/54949/6392	5	6
GO:0140053	mitochondrial gene expression	0.000104158	0.00372713	10/186	135/10877	0.00347925	28958/84769/3396/7818/7284/51318/78988/65003/3028/283459	10	6
GO:0016054	organic acid catabolic process	0.000121918	0.00422192	13/186	224/10877	0.00394113	1632/1892/594/55825/5096/2108/4706/10478/2954/4051/1666/112817/3028	13	6
GO:0046395	carboxylic acid catabolic process	0.000121918	0.00422192	13/186	224/10877	0.00394113	1632/1892/594/55825/5096/2108/4706/10478/2954/4051/1666/112817/3028	13	6
GO:0032543	mitochondrial translation	0.000152527	0.00519801	9/186	115/10877	0.00485231	28958/84769/3396/7818/7284/51318/78988/65003/283459	9	6
GO:0090181	regulation of cholesterol metabolic process	0.000155835	0.00522779	6/186	48/10877	0.00488011	6319/2194/79071/84649/2224/64788	6	6
GO:0006575	cellular modified amino acid metabolic process	0.000177809	0.00587317	10/186	144/10877	0.00548257	2194/10400/5033/11315/2954/23474/1937/3029/112817/26873	10	6
GO:0009060	aerobic respiration	0.00018447	0.00600088	7/186	70/10877	0.00560178	4190/6391/7384/50/54949/1329/6392	7	6
GO:0006414	translational elongation	0.000210814	0.00675547	9/186	120/10877	0.00630619	285381/6726/3396/7818/7284/51318/78988/65003/1937	9	6
GO:0062012	regulation of small molecule metabolic process	0.000228366	0.00721031	17/186	374/10877	0.00673077	6319/2194/79071/84649/2023/2224/10059/3953/2170/11315/64788/8654/5223/4946/1950/4199/1213	17	6
GO:0042776	mitochondrial ATP synthesis coupled proton transport	0.000262437	0.00816596	4/186	19/10877	0.00762287	509/498/1329/506	4	6
GO:0016999	antibiotic metabolic process	0.000399829	0.0122633	8/186	104/10877	0.0114477	4190/7001/47/6391/11315/50/54949/6392	8	6
GO:0044242	cellular lipid catabolic process	0.000437571	0.0132319	10/186	161/10877	0.0123519	1632/1892/55825/5096/2108/4706/2170/10478/4051/1666	10	6
GO:0008203	cholesterol metabolic process	0.000484456	0.0142905	8/186	107/10877	0.0133401	6319/2194/79071/84649/47/2224/3953/64788	8	6
GO:0002495	antigen processing and presentation of peptide antigen via MHC class II	0.000492545	0.0142905	7/186	82/10877	0.0133401	8655/1514/6396/1175/29127/11258/1213	7	6
GO:0019886	antigen processing and presentation of exogenous peptide antigen via MHC class II	0.000492545	0.0142905	7/186	82/10877	0.0133401	8655/1514/6396/1175/29127/11258/1213	7	6
GO:0002504	antigen processing and presentation of peptide or polysaccharide antigen via MHC class II	0.000530264	0.0151797	7/186	83/10877	0.0141701	8655/1514/6396/1175/29127/11258/1213	7	6
GO:0015985	energy coupled proton transport, down electrochemical gradient	0.000568336	0.0156438	4/186	23/10877	0.0146034	509/498/1329/506	4	6
GO:0015986	ATP synthesis coupled proton transport	0.000568336	0.0156438	4/186	23/10877	0.0146034	509/498/1329/506	4	6
GO:0035336	long-chain fatty-acyl-CoA metabolic process	0.000568336	0.0156438	4/186	23/10877	0.0146034	51144/79071/84649/9524	4	6
GO:1902652	secondary alcohol metabolic process	0.000657392	0.0178661	8/186	112/10877	0.0166779	6319/2194/79071/84649/47/2224/3953/64788	8	6
GO:0006635	fatty acid beta-oxidation	0.000825092	0.0221434	6/186	65/10877	0.0206707	1632/1892/2108/4706/10478/1666	6	6
GO:0016125	sterol metabolic process	0.00097991	0.0259737	8/186	119/10877	0.0242462	6319/2194/79071/84649/47/2224/3953/64788	8	6
GO:0030258	lipid modification	0.00150135	0.0393097	11/186	222/10877	0.0366954	1632/1892/84649/55825/2108/10380/4706/2170/10478/1666/1950	11	6
Gene set 28	GSE13528_AD_LIB_VS_FASTED_MC4R_N298_ADIPOSE_TISSUE_DN								4
ID	Description	pvalue	p.adjust	GeneRatio	BgRatio	qvalue	geneID	Count	5
Gene set 29	GSE13528_MC4R_D298_VS_MC4R_N298_FASTED_ADIPOSE_TISSUE_UP								1
ID	Description	pvalue	p.adjust	GeneRatio	BgRatio	qvalue	geneID	Count	2
GO:0042060	wound healing	5.43354e-06	0.00724905	19/155	409/10877	0.00695474	84750/1793/150/2192/4488/1277/3315/3708/7048/3371/139818/2768/3998/928/23208/7076/23764/2157/2697	19	3
GO:0030198	extracellular matrix organization	5.48755e-06	0.00724905	15/155	265/10877	0.00695474	83716/2192/1277/5033/84168/1490/5654/2006/4035/1303/3371/80781/7373/1545/7076	15	3
GO:0043062	extracellular structure organization	3.15333e-05	0.0277703	15/155	307/10877	0.0266428	83716/2192/1277/5033/84168/1490/5654/2006/4035/1303/3371/80781/7373/1545/7076	15	3
Gene set 30	GSE13528_MC4R_D298_VS_MC4R_N298_FASTED_ADIPOSE_TISSUE_DN								1
ID	Description	pvalue	p.adjust	GeneRatio	BgRatio	qvalue	geneID	Count	2
Gene set 31	GSE14643_STEM-CELL_TREATED_VS_CTRL_MYOCARDIAL_INFARCTION_UP								4
ID	Description	pvalue	p.adjust	GeneRatio	BgRatio	qvalue	geneID	Count	5
Gene set 32	GSE14643_STEM-CELL_TREATED_VS_CTRL_MYOCARDIAL_INFARCTION_DN								4
ID	Description	pvalue	p.adjust	GeneRatio	BgRatio	qvalue	geneID	Count	5
GO:0006119	oxidative phosphorylation	8.93159e-06	0.0230792	10/175	108/10877	0.0230792	4712/374291/516/9377/51079/84275/1340/29796/4713/126328	10	6
GO:0042775	mitochondrial ATP synthesis coupled electron transport	2.84157e-05	0.0269428	8/175	76/10877	0.0269428	4712/374291/9377/51079/1340/29796/4713/126328	8	6
GO:0042773	ATP synthesis coupled electron transport	3.12803e-05	0.0269428	8/175	77/10877	0.0269428	4712/374291/9377/51079/1340/29796/4713/126328	8	6
Gene set 33	GSE14758_SUBCLINICAL_PCV2_VS_UNINFECTED_MEDIASTINAL_LYMPH_NODE_29DPI_UP								1
ID	Description	pvalue	p.adjust	GeneRatio	BgRatio	qvalue	geneID	Count	2
GO:0045786	negative regulation of cell cycle	1.7371e-09	4.78224e-06	29/182	483/10877	4.39395e-06	8454/5017/3458/79621/11180/5683/1022/5711/5111/81617/5682/5698/5686/1820/1033/5721/983/10213/3659/79968/3576/3364/8726/7158/7919/2146/83990/81620/339479	29	3
GO:0044770	cell cycle phase transition	1.806e-07	0.000248596	25/182	460/10877	0.000228411	8454/5017/79621/1981/5683/1022/5711/5111/6119/22919/5682/5698/10133/5686/1820/1033/5721/983/10213/3364/23595/22976/5356/2146/81620	25	3
GO:0010972	negative regulation of G2/M transition of mitotic cell cycle	6.31726e-07	0.000437466	10/182	78/10877	0.000401947	8454/5683/5711/5682/5698/5686/5721/983/10213/3364	10	3
GO:1901988	negative regulation of cell cycle phase transition	6.5006e-07	0.000437466	15/182	190/10877	0.000401947	8454/5017/5683/5711/5111/5682/5698/5686/1820/5721/983/10213/3364/2146/81620	15	3
GO:0044772	mitotic cell cycle phase transition	8.74989e-07	0.000437466	23/182	433/10877	0.000401947	8454/79621/1981/5683/1022/5711/5111/6119/22919/5682/5698/10133/5686/1820/1033/5721/983/10213/3364/23595/5356/2146/81620	23	3
GO:1901987	regulation of cell cycle phase transition	9.53432e-07	0.000437466	20/182	339/10877	0.000401947	8454/5017/79621/1981/5683/5711/5111/22919/5682/5698/5686/1820/5721/983/10213/3364/22976/5356/2146/81620	20	3
GO:0002479	antigen processing and presentation of exogenous peptide antigen via MHC class I, TAP-dependent	1.20409e-06	0.000444964	9/182	65/10877	0.000408835	6890/5683/5711/5682/5698/5686/5721/10213/3135	9	3
GO:0070498	interleukin-1-mediated signaling pathway	1.4199e-06	0.000444964	10/182	85/10877	0.000408835	8454/5683/5711/5682/5698/7334/5686/5721/10213/7335	10	3
GO:1901991	negative regulation of mitotic cell cycle phase transition	1.52204e-06	0.000444964	14/182	177/10877	0.000408835	8454/5683/5711/5111/5682/5698/5686/1820/5721/983/10213/3364/2146/81620	14	3
GO:0038095	Fc-epsilon receptor signaling pathway	1.63529e-06	0.000444964	11/182	107/10877	0.000408835	8454/5683/5711/5682/5698/7334/5686/5721/10213/7335/5532	11	3
GO:0042590	antigen processing and presentation of exogenous peptide antigen via MHC class I	1.77792e-06	0.000444964	9/182	68/10877	0.000408835	6890/5683/5711/5682/5698/5686/5721/10213/3135	9	3
GO:0002223	stimulatory C-type lectin receptor signaling pathway	2.17791e-06	0.000450449	10/182	89/10877	0.000413875	8454/5683/5711/5682/5698/7334/5686/5721/10213/7335	10	3
GO:1902750	negative regulation of cell cycle G2/M phase transition	2.17791e-06	0.000450449	10/182	89/10877	0.000413875	8454/5683/5711/5682/5698/5686/5721/983/10213/3364	10	3
GO:0002220	innate immune response activating cell surface receptor signaling pathway	2.41503e-06	0.000450449	10/182	90/10877	0.000413875	8454/5683/5711/5682/5698/7334/5686/5721/10213/7335	10	3
GO:0045930	negative regulation of mitotic cell cycle	2.45432e-06	0.000450449	16/182	239/10877	0.000413875	8454/5017/5683/5711/5111/5682/5698/5686/1820/5721/983/10213/3364/2146/81620/339479	16	3
GO:0044839	cell cycle G2/M phase transition	2.74827e-06	0.000472874	15/182	213/10877	0.00043448	8454/79621/5683/1022/5711/22919/5682/5698/10133/5686/5721/983/10213/3364/22976	15	3
GO:0031145	anaphase-promoting complex-dependent catabolic process	3.65823e-06	0.000592417	9/182	74/10877	0.000544317	5683/5711/5682/5698/5686/5721/983/10213/7324	9	3
GO:0000086	G2/M transition of mitotic cell cycle	5.37868e-06	0.000815384	14/182	197/10877	0.00074918	8454/79621/5683/1022/5711/22919/5682/5698/10133/5686/5721/983/10213/3364	14	3
GO:1901990	regulation of mitotic cell cycle phase transition	5.62743e-06	0.000815384	18/182	316/10877	0.00074918	8454/79621/1981/5683/5711/5111/22919/5682/5698/5686/1820/5721/983/10213/3364/5356/2146/81620	18	3
GO:0006401	RNA catabolic process	6.99522e-06	0.000910533	18/182	321/10877	0.000836603	9967/8559/79621/1981/5683/5711/5682/5698/5686/11157/115752/5721/6152/9939/10213/6222/6418/23644	18	3
GO:0070555	response to interleukin-1	7.24256e-06	0.000910533	12/182	149/10877	0.000836603	8454/5683/5711/5682/5698/7334/5686/5721/10213/7335/9759/3576	12	3
GO:1902749	regulation of cell cycle G2/M phase transition	7.27632e-06	0.000910533	13/182	175/10877	0.000836603	8454/79621/5683/5711/22919/5682/5698/5686/5721/983/10213/3364/22976	13	3
GO:0002474	antigen processing and presentation of peptide antigen via MHC class I	7.8096e-06	0.00091705	9/182	81/10877	0.000842591	6890/5683/5711/5682/5698/5686/5721/10213/3135	9	3
GO:0010948	negative regulation of cell cycle process	7.99462e-06	0.00091705	16/182	262/10877	0.000842591	8454/5017/5683/5711/5111/5682/5698/5686/1820/5721/983/10213/3364/8726/2146/81620	16	3
GO:0071347	cellular response to interleukin-1	1.18281e-05	0.00130251	11/182	131/10877	0.00119676	8454/5683/5711/5682/5698/7334/5686/5721/10213/7335/3576	11	3
GO:0034612	response to tumor necrosis factor	1.31844e-05	0.00134522	14/182	213/10877	0.00123599	5683/5711/5682/51667/5698/5686/10068/5721/6772/10213/5771/9759/3576/81858	14	3
GO:0010389	regulation of G2/M transition of mitotic cell cycle	1.31932e-05	0.00134522	12/182	158/10877	0.00123599	8454/79621/5683/5711/22919/5682/5698/5686/5721/983/10213/3364	12	3
GO:0031146	SCF-dependent proteasomal ubiquitin-dependent protein catabolic process	1.47972e-05	0.00145488	8/182	67/10877	0.00133675	8454/5683/5711/5682/5698/5686/5721/10213	8	3
GO:0071356	cellular response to tumor necrosis factor	2.33011e-05	0.00217193	13/182	195/10877	0.00199558	5683/5711/5682/5698/5686/10068/5721/6772/10213/5771/9759/3576/81858	13	3
GO:0033209	tumor necrosis factor-mediated signaling pathway	2.36679e-05	0.00217193	10/182	116/10877	0.00199558	5683/5711/5682/5698/5686/5721/6772/10213/5771/81858	10	3
GO:0006521	regulation of cellular amino acid metabolic process	2.98354e-05	0.00264958	7/182	54/10877	0.00243445	5683/5711/5682/5698/5686/5721/10213	7	3
GO:0000082	G1/S transition of mitotic cell cycle	3.37748e-05	0.0028495	13/182	202/10877	0.00261814	8454/1981/1022/5111/6119/1820/1033/5721/983/23595/5356/2146/81620	13	3
GO:0061418	regulation of transcription from RNA polymerase II promoter in response to hypoxia	3.41568e-05	0.0028495	8/182	75/10877	0.00261814	5683/5711/5682/5698/5686/5721/10213/6921	8	3
GO:0002478	antigen processing and presentation of exogenous peptide antigen	3.72445e-05	0.00301571	11/182	148/10877	0.00277085	6890/5683/5711/164/5682/5698/5686/5721/10213/3135/3798	11	3
GO:0006402	mRNA catabolic process	3.93113e-05	0.00309212	16/182	298/10877	0.00284106	9967/8559/1981/5683/5711/5682/5698/5686/11157/5721/6152/9939/10213/6222/6418/23644	16	3
GO:0050852	T cell receptor signaling pathway	4.48183e-05	0.00342736	11/182	151/10877	0.00314908	8454/5683/5711/5682/5698/7334/5686/5721/10213/5771/7335	11	3
GO:0019884	antigen processing and presentation of exogenous antigen	5.05738e-05	0.00376297	11/182	153/10877	0.00345744	6890/5683/5711/164/5682/5698/5686/5721/10213/3135/3798	11	3
GO:0048002	antigen processing and presentation of peptide antigen	5.36825e-05	0.00380134	11/182	154/10877	0.0034927	6890/5683/5711/164/5682/5698/5686/5721/10213/3135/3798	11	3
GO:0050851	antigen receptor-mediated signaling pathway	5.38512e-05	0.00380134	12/182	182/10877	0.0034927	8454/3507/5683/5711/5682/5698/7334/5686/5721/10213/5771/7335	12	3
GO:0044843	cell cycle G1/S phase transition	5.5786e-05	0.00383947	13/182	212/10877	0.00352773	8454/1981/1022/5111/6119/1820/1033/5721/983/23595/5356/2146/81620	13	3
GO:0038093	Fc receptor signaling pathway	6.03953e-05	0.00405532	11/182	156/10877	0.00372605	8454/5683/5711/5682/5698/7334/5686/5721/10213/7335/5532	11	3
GO:0000377	RNA splicing, via transesterification reactions with bulged adenosine as nucleophile	6.53025e-05	0.004161	15/182	278/10877	0.00382315	9967/64783/8559/6427/6426/81608/11157/1479/9939/8241/7919/6636/5356/80004/23524	15	3
GO:0000398	mRNA splicing, via spliceosome	6.53025e-05	0.004161	15/182	278/10877	0.00382315	9967/64783/8559/6427/6426/81608/11157/1479/9939/8241/7919/6636/5356/80004/23524	15	3
GO:0031570	DNA integrity checkpoint	6.74246e-05	0.004161	10/182	131/10877	0.00382315	79621/5111/1820/983/79968/3364/7158/7919/83990/81620	10	3
GO:0000375	RNA splicing, via transesterification reactions	6.80149e-05	0.004161	15/182	279/10877	0.00382315	9967/64783/8559/6427/6426/81608/11157/1479/9939/8241/7919/6636/5356/80004/23524	15	3
GO:0006471	protein ADP-ribosylation	7.43219e-05	0.004448	5/182	27/10877	0.00408685	54969/3458/10039/25976/10038	5	3
GO:0043488	regulation of mRNA stability	7.6644e-05	0.00448938	10/182	133/10877	0.00412487	9967/1981/5683/5711/5682/5698/5686/5721/10213/6418	10	3
GO:0006369	termination of RNA polymerase II transcription	8.21219e-05	0.00471003	7/182	63/10877	0.00432761	6427/6426/81608/1479/9939/7919/6636	7	3
GO:0000209	protein polyubiquitination	8.42806e-05	0.00473519	14/182	252/10877	0.00435073	8454/5683/5711/5682/5698/7334/5686/7174/5721/10213/7335/81858/7328/7324	14	3
GO:0043687	post-translational protein modification	0.000102339	0.00563479	16/182	323/10877	0.00517728	8454/5683/5711/7347/5682/51667/9140/5698/5686/5721/25879/10213/6921/10987/718/54876	16	3
GO:0007050	cell cycle arrest	0.000104681	0.00565072	12/182	195/10877	0.00519192	8454/3458/11180/1022/5111/81617/1820/1033/983/3659/3576/339479	12	3
GO:0043487	regulation of RNA stability	0.000110987	0.00587593	10/182	139/10877	0.00539884	9967/1981/5683/5711/5682/5698/5686/5721/10213/6418	10	3
GO:0045088	regulation of innate immune response	0.000113392	0.00588994	15/182	292/10877	0.00541172	8454/3458/5683/5711/164/5682/5698/7334/5686/5721/6772/10213/5771/3659/7335	15	3
GO:0033238	regulation of cellular amine metabolic process	0.000122026	0.00614416	7/182	67/10877	0.00564529	5683/5711/5682/5698/5686/5721/10213	7	3
GO:0000380	alternative mRNA splicing, via spliceosome	0.000122749	0.00614416	6/182	47/10877	0.00564529	9967/6427/6426/9939/8241/80004	6	3
GO:2001020	regulation of response to DNA damage stimulus	0.000157552	0.00774539	10/182	145/10877	0.00711651	79621/5111/387893/7334/7335/79968/7158/7919/22976/10635	10	3
GO:0006353	DNA-templated transcription, termination	0.000172063	0.00831033	8/182	94/10877	0.00763558	1022/6427/6426/81608/1479/9939/7919/6636	8	3
GO:1903311	regulation of mRNA metabolic process	0.000179388	0.00847229	13/182	238/10877	0.00778439	9967/1981/5683/5711/6427/5682/5698/5686/5721/9939/10213/6418/8241	13	3
GO:0002768	immune response-regulating cell surface receptor signaling pathway	0.000181571	0.00847229	14/182	271/10877	0.00778439	8454/3507/5683/5711/5682/5698/7334/5686/5721/10213/5771/3135/7335/5532	14	3
GO:1902036	regulation of hematopoietic stem cell differentiation	0.000192689	0.00884123	7/182	72/10877	0.00812337	5683/5711/5682/5698/5686/5721/10213	7	3
GO:0061013	regulation of mRNA catabolic process	0.000196979	0.00888987	10/182	149/10877	0.00816807	9967/1981/5683/5711/5682/5698/5686/5721/10213/6418	10	3
GO:0000077	DNA damage checkpoint	0.000215884	0.00945945	9/182	123/10877	0.0086914	79621/5111/1820/983/79968/3364/7158/7919/83990	9	3
GO:0019882	antigen processing and presentation	0.000216471	0.00945945	11/182	180/10877	0.0086914	6890/5683/5711/164/5682/5698/5686/5721/10213/3135/3798	11	3
GO:0038061	NIK/NF-kappaB signaling	0.000246518	0.0106041	8/182	99/10877	0.00974315	8454/5683/5711/5682/5698/5686/5721/10213	8	3
GO:0034655	nucleobase-containing compound catabolic process	0.000261546	0.0110775	20/182	500/10877	0.010178	9967/8559/79621/1981/5683/5711/5682/5698/5686/11157/115752/5721/6152/9939/10213/9759/6222/6418/23644/129401	20	3
GO:2000736	regulation of stem cell differentiation	0.000282872	0.0117992	8/182	101/10877	0.0108412	5683/5711/5682/5698/5686/5721/10213/4054	8	3
GO:0008380	RNA splicing	0.000330869	0.0135953	16/182	358/10877	0.0124914	9967/64783/8559/6427/6426/81608/11157/1479/9939/51001/8241/7919/6636/5356/80004/23524	16	3
GO:0010499	proteasomal ubiquitin-independent protein catabolic process	0.000363238	0.014608	4/182	21/10877	0.0134219	5683/5682/5698/5686	4	3
GO:0060218	hematopoietic stem cell differentiation	0.000371435	0.014608	7/182	80/10877	0.0134219	5683/5711/5682/5698/5686/5721/10213	7	3
GO:1901532	regulation of hematopoietic progenitor cell differentiation	0.000371435	0.014608	7/182	80/10877	0.0134219	5683/5711/5682/5698/5686/5721/10213	7	3
GO:0001736	establishment of planar polarity	0.000474803	0.0179059	8/182	109/10877	0.0164521	5683/5711/5682/5698/5686/5721/10213/1741	8	3
GO:0007164	establishment of tissue polarity	0.000474803	0.0179059	8/182	109/10877	0.0164521	5683/5711/5682/5698/5686/5721/10213/1741	8	3
GO:0090263	positive regulation of canonical Wnt signaling pathway	0.000474803	0.0179059	8/182	109/10877	0.0164521	5683/5711/5682/5698/5686/5721/10213/406	8	3
GO:0016570	histone modification	0.000490329	0.0182416	16/182	371/10877	0.0167605	387893/9730/7334/983/93081/6871/9759/6418/817/8726/3720/10902/22976/2146/7324/80312	16	3
GO:0043618	regulation of transcription from RNA polymerase II promoter in response to stress	0.000504848	0.0185313	8/182	110/10877	0.0170267	5683/5711/5682/5698/5686/5721/10213/6921	8	3
GO:0002758	innate immune response-activating signal transduction	0.000511608	0.0185323	11/182	199/10877	0.0170276	8454/5683/5711/5682/5698/7334/5686/5721/10213/3659/7335	11	3
GO:0016569	covalent chromatin modification	0.000636083	0.022742	16/182	380/10877	0.0208955	387893/9730/7334/983/93081/6871/9759/6418/817/8726/3720/10902/22976/2146/7324/80312	16	3
GO:0043161	proteasome-mediated ubiquitin-dependent protein catabolic process	0.000657323	0.0232001	15/182	344/10877	0.0213164	8454/5683/5711/5682/51667/5698/5686/5721/6599/983/10213/406/81858/7328/7324	15	3
GO:0031056	regulation of histone modification	0.000679078	0.0236646	8/182	115/10877	0.0217432	7334/6871/6418/817/8726/3720/22976/80312	8	3
GO:0000075	cell cycle checkpoint	0.000709802	0.0244261	10/182	175/10877	0.0224428	79621/5111/1820/983/79968/3364/7158/7919/83990/81620	10	3
GO:0043620	regulation of DNA-templated transcription in response to stress	0.000719141	0.0244419	8/182	116/10877	0.0224574	5683/5711/5682/5698/5686/5721/10213/6921	8	3
GO:0045089	positive regulation of innate immune response	0.000785479	0.026371	12/182	243/10877	0.0242298	8454/5683/5711/164/5682/5698/7334/5686/5721/10213/3659/7335	12	3
GO:0031349	positive regulation of defense response	0.000826233	0.0266193	14/182	315/10877	0.024458	8454/5683/5711/164/5682/5698/10133/7334/5686/5721/10213/3659/7335/718	14	3
GO:0002218	activation of innate immune response	0.000833014	0.0266193	11/182	211/10877	0.024458	8454/5683/5711/5682/5698/7334/5686/5721/10213/3659/7335	11	3
GO:0006281	DNA repair	0.000840144	0.0266193	16/182	390/10877	0.024458	1022/5111/6119/10039/7334/983/10213/7335/11232/10987/3364/10038/7158/22976/10635/83990	16	3
GO:0006302	double-strand break repair	0.000841316	0.0266193	9/182	148/10877	0.024458	6119/10039/7334/10213/3364/7158/22976/10635/83990	9	3
GO:0006913	nucleocytoplasmic transport	0.000848842	0.0266193	13/182	280/10877	0.024458	3458/6427/3838/6426/81608/983/9939/10541/406/6418/7919/6636/129401	13	3
GO:0001738	morphogenesis of a polarized epithelium	0.000850889	0.0266193	8/182	119/10877	0.024458	5683/5711/5682/5698/5686/5721/10213/1741	8	3
GO:0060333	interferon-gamma-mediated signaling pathway	0.000865569	0.0267743	6/182	67/10877	0.0246004	3458/6772/5771/3659/3135/817	6	3
GO:0051169	nuclear transport	0.000936348	0.0286418	13/182	283/10877	0.0263163	3458/6427/3838/6426/81608/983/9939/10541/406/6418/7919/6636/129401	13	3
GO:0002429	immune response-activating cell surface receptor signaling pathway	0.000971696	0.0293965	12/182	249/10877	0.0270097	8454/3507/5683/5711/5682/5698/7334/5686/5721/10213/5771/7335	12	3
GO:1901976	regulation of cell cycle checkpoint	0.000984884	0.0294716	4/182	27/10877	0.0270787	79621/79968/7919/81620	4	3
GO:0006310	DNA recombination	0.00104372	0.0308964	10/182	184/10877	0.0283878	3838/6119/9730/7334/10213/3364/7158/22976/10635/83990	10	3
GO:2000001	regulation of DNA damage checkpoint	0.00116471	0.034111	3/182	13/10877	0.0313414	79621/79968/7919	3	3
GO:0044106	cellular amine metabolic process	0.00118417	0.0343161	7/182	97/10877	0.0315298	5683/5711/5682/5698/5686/5721/10213	7	3
GO:0006397	mRNA processing	0.00124967	0.035837	16/182	405/10877	0.0329272	9967/64783/8559/1022/6427/6426/81608/11157/1479/9939/8241/7919/6636/5356/80004/23524	16	3
GO:0031058	positive regulation of histone modification	0.00126503	0.0359033	6/182	72/10877	0.0329882	7334/6871/8726/3720/22976/80312	6	3
GO:0060071	Wnt signaling pathway, planar cell polarity pathway	0.00133451	0.0374889	7/182	99/10877	0.034445	5683/5711/5682/5698/5686/5721/10213	7	3
GO:0090175	regulation of establishment of planar polarity	0.00141508	0.0393505	7/182	100/10877	0.0361555	5683/5711/5682/5698/5686/5721/10213	7	3
GO:0031062	positive regulation of histone methylation	0.001479	0.0404688	4/182	30/10877	0.037183	8726/3720/22976/80312	4	3
GO:0048863	stem cell differentiation	0.00149674	0.0404688	10/182	193/10877	0.037183	5683/5711/5682/5698/5686/5721/5308/10213/4054/3720	10	3
GO:0009308	amine metabolic process	0.00149939	0.0404688	7/182	101/10877	0.037183	5683/5711/5682/5698/5686/5721/10213	7	3
GO:0002764	immune response-regulating signaling pathway	0.00152716	0.0408182	15/182	374/10877	0.037504	8454/3507/5683/5711/5682/5698/7334/5686/5721/10213/5771/3659/3135/7335/5532	15	3
GO:0000724	double-strand break repair via homologous recombination	0.0015645	0.0414141	6/182	75/10877	0.0380515	6119/7334/10213/3364/7158/10635	6	3
GO:0035567	non-canonical Wnt signaling pathway	0.00166298	0.0435136	8/182	132/10877	0.0399806	5683/5711/5682/5698/5686/5721/10213/5532	8	3
GO:0000725	recombinational repair	0.00167543	0.0435136	6/182	76/10877	0.0399806	6119/7334/10213/3364/7158/10635	6	3
GO:0006260	DNA replication	0.00173154	0.0445509	11/182	231/10877	0.0409336	5111/6119/10039/983/6418/11232/3364/10038/23595/83990/81620	11	3
GO:0071456	cellular response to hypoxia	0.00188038	0.0479323	9/182	166/10877	0.0440405	5683/5711/5682/5698/5686/5721/10213/6921/83990	9	3
GO:1905269	positive regulation of chromatin organization	0.00191511	0.0483696	6/182	78/10877	0.0444423	7334/6871/8726/3720/22976/80312	6	3
GO:0010498	proteasomal protein catabolic process	0.00197651	0.0494668	15/182	384/10877	0.0454504	8454/5683/5711/5682/51667/5698/5686/5721/6599/983/10213/406/81858/7328/7324	15	3
Gene set 34	GSE14758_SUBCLINICAL_PCV2_VS_UNINFECTED_MEDIASTINAL_LYMPH_NODE_29DPI_DN								1
ID	Description	pvalue	p.adjust	GeneRatio	BgRatio	qvalue	geneID	Count	2
GO:0002274	myeloid leukocyte activation	6.16986e-06	0.00366156	23/190	465/10877	0.00350474	79888/847/6282/64114/5660/5329/8692/3310/3916/3162/5869/10493/7099/2040/4125/1915/5709/7077/535/1508/967/2588/10857	23	3
GO:0043312	neutrophil degranulation	6.54177e-06	0.00366156	20/190	368/10877	0.00350474	79888/847/6282/64114/5660/5329/3310/3916/5869/10493/2040/4125/1915/5709/7077/535/1508/967/2588/10857	20	3
GO:0002283	neutrophil activation involved in immune response	6.81199e-06	0.00366156	20/190	369/10877	0.00350474	79888/847/6282/64114/5660/5329/3310/3916/5869/10493/2040/4125/1915/5709/7077/535/1508/967/2588/10857	20	3
GO:0043299	leukocyte degranulation	8.16086e-06	0.00366156	21/190	406/10877	0.00350474	79888/847/6282/64114/5660/5329/3310/3916/3162/5869/10493/2040/4125/1915/5709/7077/535/1508/967/2588/10857	21	3
GO:0002275	myeloid cell activation involved in immune response	8.79942e-06	0.00366156	21/190	408/10877	0.00350474	79888/847/6282/64114/5660/5329/3310/3916/3162/5869/10493/2040/4125/1915/5709/7077/535/1508/967/2588/10857	21	3
GO:0042119	neutrophil activation	9.00438e-06	0.00366156	20/190	376/10877	0.00350474	79888/847/6282/64114/5660/5329/3310/3916/5869/10493/2040/4125/1915/5709/7077/535/1508/967/2588/10857	20	3
GO:0002446	neutrophil mediated immunity	1.0526e-05	0.00366156	20/190	380/10877	0.00350474	79888/847/6282/64114/5660/5329/3310/3916/5869/10493/2040/4125/1915/5709/7077/535/1508/967/2588/10857	20	3
GO:0036230	granulocyte activation	1.0941e-05	0.00366156	20/190	381/10877	0.00350474	79888/847/6282/64114/5660/5329/3310/3916/5869/10493/2040/4125/1915/5709/7077/535/1508/967/2588/10857	20	3
GO:0002444	myeloid leukocyte mediated immunity	1.14067e-05	0.00366156	21/190	415/10877	0.00350474	79888/847/6282/64114/5660/5329/3310/3916/3162/5869/10493/2040/4125/1915/5709/7077/535/1508/967/2588/10857	21	3
GO:0001666	response to hypoxia	5.40888e-05	0.0156262	16/190	293/10877	0.014957	2627/847/5351/4504/3162/481/358/4323/5327/5034/5710/5709/114757/9124/7049/7412	16	3
GO:0036293	response to decreased oxygen levels	7.16235e-05	0.0188109	16/190	300/10877	0.0180053	2627/847/5351/4504/3162/481/358/4323/5327/5034/5710/5709/114757/9124/7049/7412	16	3
GO:0070482	response to oxygen levels	0.000169307	0.0407606	16/190	323/10877	0.0390148	2627/847/5351/4504/3162/481/358/4323/5327/5034/5710/5709/114757/9124/7049/7412	16	3
Gene set 35	GSE14790_SUBCLINICAL_PCV2_VS_UNINFECTED_BLOOD_7DPI_UP								4
ID	Description	pvalue	p.adjust	GeneRatio	BgRatio	qvalue	geneID	Count	5
GO:0030217	T cell differentiation	1.38686e-08	4.14534e-05	16/182	164/10877	3.76935e-05	914/3932/6659/8651/1236/915/91543/916/3965/3549/54440/7040/27086/1880/23240/3146	16	6
GO:0042110	T cell activation	2.07128e-07	0.000309553	20/182	308/10877	0.000281477	914/3932/6352/919/6659/8651/1236/915/91543/916/3965/3549/54440/7040/27086/84941/3127/1880/23240/3146	20	6
GO:0030098	lymphocyte differentiation	3.29398e-07	0.00032819	17/182	232/10877	0.000298423	914/3932/6659/8651/1236/915/91543/916/3965/3549/54440/7040/27086/1880/23240/695/3146	17	6
GO:0002696	positive regulation of leukocyte activation	8.73229e-07	0.000516272	16/182	221/10877	0.000469446	914/3932/6352/919/8651/1236/915/916/3965/3549/54440/7040/3127/1880/695/3146	16	6
GO:0051251	positive regulation of lymphocyte activation	1.03118e-06	0.000516272	15/182	197/10877	0.000469446	3932/6352/919/8651/1236/915/916/3965/3549/54440/7040/3127/1880/695/3146	15	6
GO:0034340	response to type I interferon	1.20409e-06	0.000516272	9/182	65/10877	0.000469446	4938/5696/6672/9636/91543/2537/55337/79594/4599	9	6
GO:0050870	positive regulation of T cell activation	1.20907e-06	0.000516272	13/182	149/10877	0.000469446	3932/6352/919/8651/1236/915/916/3965/3549/54440/7040/3127/3146	13	6
GO:0050867	positive regulation of cell activation	1.40037e-06	0.000523212	16/182	229/10877	0.000475757	914/3932/6352/919/8651/1236/915/916/3965/3549/54440/7040/3127/1880/695/3146	16	6
GO:1903039	positive regulation of leukocyte cell-cell adhesion	2.03338e-06	0.000675307	13/182	156/10877	0.000614056	3932/6352/919/8651/1236/915/916/3965/3549/54440/7040/3127/3146	13	6
GO:0046649	lymphocyte activation	3.8613e-06	0.00105278	22/182	438/10877	0.000957294	914/3932/6352/919/6659/8651/1236/915/91543/916/3965/5580/3549/54440/7040/27086/84941/3127/1880/23240/695/3146	22	6
GO:0050863	regulation of T cell activation	3.87441e-06	0.00105278	15/182	219/10877	0.000957294	914/3932/6352/919/8651/1236/915/916/3965/3549/54440/7040/3127/23240/3146	15	6
GO:0007159	leukocyte cell-cell adhesion	7.0513e-06	0.00142157	15/182	230/10877	0.00129264	3932/6352/919/8651/1236/915/916/3965/7264/3549/54440/7040/3127/23240/3146	15	6
GO:0051249	regulation of lymphocyte activation	7.10404e-06	0.00142157	17/182	290/10877	0.00129264	914/3932/6352/919/8651/1236/915/916/3965/3549/54440/7040/3127/1880/23240/695/3146	17	6
GO:0060337	type I interferon signaling pathway	7.27692e-06	0.00142157	8/182	61/10877	0.00129264	4938/5696/6672/9636/91543/2537/79594/4599	8	6
GO:0071357	cellular response to type I interferon	7.27692e-06	0.00142157	8/182	61/10877	0.00129264	4938/5696/6672/9636/91543/2537/79594/4599	8	6
GO:1903037	regulation of leukocyte cell-cell adhesion	7.60963e-06	0.00142157	14/182	203/10877	0.00129264	3932/6352/919/8651/1236/915/916/3965/3549/54440/7040/3127/23240/3146	14	6
GO:0045069	regulation of viral genome replication	1.17817e-05	0.00200655	8/182	65/10877	0.00182456	6352/4938/9636/91543/55337/5479/4599/10450	8	6
GO:0022409	positive regulation of cell-cell adhesion	1.25356e-05	0.00200655	13/182	184/10877	0.00182456	3932/6352/919/8651/1236/915/916/3965/3549/54440/7040/3127/3146	13	6
GO:0045071	negative regulation of viral genome replication	1.27549e-05	0.00200655	6/182	32/10877	0.00182456	6352/4938/9636/91543/55337/4599	6	6
GO:0022407	regulation of cell-cell adhesion	1.68007e-05	0.00251086	16/182	278/10877	0.00228312	3932/6352/5598/919/8651/1236/915/916/3965/5580/3549/54440/7040/3127/23240/3146	16	6
GO:0002407	dendritic cell chemotaxis	2.03237e-05	0.00289274	5/182	21/10877	0.00263037	6352/1236/3965/1880/3146	5	6
GO:0036336	dendritic cell migration	4.0756e-05	0.00553726	5/182	24/10877	0.00503503	6352/1236/3965/1880/3146	5	6
GO:0050865	regulation of cell activation	4.39397e-05	0.00566511	18/182	368/10877	0.00515128	914/3932/6352/919/8651/1236/915/916/3965/5580/3549/54440/7040/3127/1880/23240/695/3146	18	6
GO:0046631	alpha-beta T cell activation	4.54877e-05	0.00566511	8/182	78/10877	0.00515128	91543/916/3965/3549/54440/27086/1880/3146	8	6
GO:0002694	regulation of leukocyte activation	4.74467e-05	0.00567272	17/182	336/10877	0.0051582	914/3932/6352/919/8651/1236/915/916/3965/3549/54440/7040/3127/1880/23240/695/3146	17	6
GO:1903900	regulation of viral life cycle	5.07399e-05	0.00583314	9/182	102/10877	0.00530406	6352/4938/9636/91543/55337/3965/5479/4599/10450	9	6
GO:0043367	CD4-positive, alpha-beta T cell differentiation	6.42689e-05	0.00686464	6/182	42/10877	0.00624201	91543/3965/54440/27086/1880/3146	6	6
GO:0002507	tolerance induction	6.65861e-05	0.00686464	4/182	14/10877	0.00624201	916/3965/7040/3146	4	6
GO:0046632	alpha-beta T cell differentiation	6.66024e-05	0.00686464	7/182	61/10877	0.00624201	91543/3965/3549/54440/27086/1880/3146	7	6
GO:0002521	leukocyte differentiation	7.08175e-05	0.00705578	17/182	347/10877	0.00641582	914/3932/6659/8651/1236/915/91543/916/3965/3549/54440/7040/27086/1880/23240/695/3146	17	6
GO:0032649	regulation of interferon-gamma production	7.40307e-05	0.00713799	7/182	62/10877	0.00649057	914/1236/9636/916/3965/54440/3146	7	6
GO:0048872	homeostasis of number of cells	9.02725e-05	0.00832195	12/182	192/10877	0.00756714	4779/1236/2176/3965/7564/54440/7040/669/3276/1880/3146/1000	12	6
GO:0019079	viral genome replication	9.18783e-05	0.00832195	8/182	86/10877	0.00756714	6352/4938/9636/91543/55337/5479/4599/10450	8	6
GO:0032609	interferon-gamma production	0.000122026	0.0107276	7/182	67/10877	0.00975456	914/1236/9636/916/3965/54440/3146	7	6
GO:0031295	T cell costimulation	0.000138356	0.011336	6/182	48/10877	0.0103078	3932/919/1236/915/916/3127	6	6
GO:0050670	regulation of lymphocyte proliferation	0.000140482	0.011336	10/182	143/10877	0.0103078	6352/916/3965/3549/54440/7040/1880/23240/695/3146	10	6
GO:0045619	regulation of lymphocyte differentiation	0.00014762	0.011336	9/182	117/10877	0.0103078	914/8651/3965/3549/54440/7040/23240/695/3146	9	6
GO:0032944	regulation of mononuclear cell proliferation	0.000148811	0.011336	10/182	144/10877	0.0103078	6352/916/3965/3549/54440/7040/1880/23240/695/3146	10	6
GO:0031294	lymphocyte costimulation	0.000155495	0.011336	6/182	49/10877	0.0103078	3932/919/1236/915/916/3127	6	6
GO:0035710	CD4-positive, alpha-beta T cell activation	0.000155495	0.011336	6/182	49/10877	0.0103078	91543/3965/54440/27086/1880/3146	6	6
GO:1903901	negative regulation of viral life cycle	0.000155495	0.011336	6/182	49/10877	0.0103078	6352/4938/9636/91543/55337/4599	6	6
GO:0045580	regulation of T cell differentiation	0.000185239	0.0131828	8/182	95/10877	0.0119871	914/8651/3965/3549/54440/7040/23240/3146	8	6
GO:0046651	lymphocyte proliferation	0.000196339	0.0136479	11/182	178/10877	0.01241	6352/916/3965/5580/3549/54440/7040/1880/23240/695/3146	11	6
GO:0032943	mononuclear cell proliferation	0.000216471	0.0145872	11/182	180/10877	0.0132641	6352/916/3965/5580/3549/54440/7040/1880/23240/695/3146	11	6
GO:0070663	regulation of leukocyte proliferation	0.000219613	0.0145872	10/182	151/10877	0.0132641	6352/916/3965/3549/54440/7040/1880/23240/695/3146	10	6
GO:0050704	regulation of interleukin-1 secretion	0.000297921	0.0193584	4/182	20/10877	0.0176026	1236/3965/27086/3146	4	6
GO:0042129	regulation of T cell proliferation	0.000345527	0.021974	8/182	104/10877	0.019981	6352/916/3965/3549/54440/7040/23240/3146	8	6
GO:1903708	positive regulation of hemopoiesis	0.000366013	0.0227919	9/182	132/10877	0.0207247	8651/3965/3549/7564/54440/7040/3276/695/3146	9	6
GO:0070661	leukocyte proliferation	0.000377706	0.0230401	11/182	192/10877	0.0209503	6352/916/3965/5580/3549/54440/7040/1880/23240/695/3146	11	6
GO:0048525	negative regulation of viral process	0.000397436	0.0230662	6/182	58/10877	0.0209741	6352/4938/9636/91543/55337/4599	6	6
GO:0002790	peptide secretion	0.000397758	0.0230662	17/182	401/10877	0.0209741	914/6352/6659/8651/1236/91543/10113/91608/3965/388581/7040/23586/27086/115827/23086/3146/26958	17	6
GO:0043900	regulation of multi-organism process	0.000403663	0.0230662	14/182	293/10877	0.0209741	6352/4938/9636/91543/55337/3965/60343/79594/10133/23586/5479/27086/4599/10450	14	6
GO:0034341	response to interferon-gamma	0.000409002	0.0230662	9/182	134/10877	0.0209741	6352/4938/8651/29927/6672/55337/3965/5580/3127	9	6
GO:0045785	positive regulation of cell adhesion	0.000447126	0.0244877	14/182	296/10877	0.0222667	3932/6352/7402/919/8651/1236/915/916/3965/3549/54440/7040/3127/3146	14	6
GO:0032615	interleukin-12 production	0.000450594	0.0244877	5/182	39/10877	0.0222667	1236/3965/5580/27086/3146	5	6
GO:0098542	defense response to other organism	0.000472245	0.0246441	13/182	263/10877	0.0224088	4938/9636/91543/55337/60343/5580/79594/10133/7040/23586/27086/4599/10964	13	6
GO:0006094	gluconeogenesis	0.000478206	0.0246441	6/182	60/10877	0.0224088	2027/388581/10993/11091/669/1196	6	6
GO:2000106	regulation of leukocyte apoptotic process	0.000478206	0.0246441	6/182	60/10877	0.0224088	6352/1236/3965/27086/84941/695	6	6
GO:0045591	positive regulation of regulatory T cell differentiation	0.000507128	0.0253097	3/182	10/10877	0.0230141	8651/3965/7040	3	6
GO:0070228	regulation of lymphocyte apoptotic process	0.000508057	0.0253097	5/182	40/10877	0.0230141	6352/3965/27086/84941/695	5	6
GO:0043901	negative regulation of multi-organism process	0.000569564	0.0279086	8/182	112/10877	0.0253773	6352/4938/9636/91543/55337/60343/79594/4599	8	6
GO:0019319	hexose biosynthetic process	0.000622708	0.0300205	6/182	63/10877	0.0272976	2027/388581/10993/11091/669/1196	6	6
GO:0009306	protein secretion	0.000636083	0.0301786	16/182	380/10877	0.0274414	914/6352/6659/8651/1236/91543/10113/3965/388581/7040/23586/27086/115827/23086/3146/26958	16	6
GO:0097190	apoptotic signaling pathway	0.000712133	0.0332588	18/182	461/10877	0.0302422	3932/5598/6672/10525/2537/916/3965/5580/79594/5533/7040/6753/5163/624/29844/2923/695/2876	18	6
GO:0050701	interleukin-1 secretion	0.000849986	0.0390863	4/182	26/10877	0.0355411	1236/3965/27086/3146	4	6
GO:0045621	positive regulation of lymphocyte differentiation	0.000936354	0.0424055	6/182	68/10877	0.0385593	8651/3965/3549/54440/7040/695	6	6
GO:0032613	interleukin-10 production	0.000984884	0.0436336	4/182	27/10877	0.039676	3965/5580/54440/3146	4	6
GO:0046364	monosaccharide biosynthetic process	0.00101151	0.0436336	6/182	69/10877	0.039676	2027/388581/10993/11091/669/1196	6	6
GO:0050792	regulation of viral process	0.00101706	0.0436336	9/182	152/10877	0.039676	6352/4938/9636/91543/55337/3965/5479/4599/10450	9	6
GO:0002791	regulation of peptide secretion	0.00102186	0.0436336	14/182	322/10877	0.039676	914/6352/6659/8651/1236/91543/91608/3965/388581/7040/23586/27086/23086/3146	14	6
GO:0042098	T cell proliferation	0.00105601	0.0444566	8/182	123/10877	0.0404243	6352/916/3965/3549/54440/7040/23240/3146	8	6
Gene set 36	GSE14790_SUBCLINICAL_PCV2_VS_UNINFECTED_BLOOD_7DPI_DN								4
ID	Description	pvalue	p.adjust	GeneRatio	BgRatio	qvalue	geneID	Count	5
Gene set 37	GSE14790_SUBCLINICAL_PCV2_VS_UNINFECTED_BLOOD_21DPI_UP								1
ID	Description	pvalue	p.adjust	GeneRatio	BgRatio	qvalue	geneID	Count	2
GO:0006614	SRP-dependent cotranslational protein targeting to membrane	4.75446e-14	1.29179e-10	17/183	86/10877	1.2742e-10	6159/6161/6176/6124/6168/6170/6130/6132/6138/6157/9349/6228/6146/6194/6137/6230/6233	17	3
GO:0006613	cotranslational protein targeting to membrane	1.27605e-13	1.73352e-10	17/183	91/10877	1.70991e-10	6159/6161/6176/6124/6168/6170/6130/6132/6138/6157/9349/6228/6146/6194/6137/6230/6233	17	3
GO:0045047	protein targeting to ER	3.21739e-13	2.91389e-10	17/183	96/10877	2.8742e-10	6159/6161/6176/6124/6168/6170/6130/6132/6138/6157/9349/6228/6146/6194/6137/6230/6233	17	3
GO:0019080	viral gene expression	4.6593e-13	3.16483e-10	21/183	166/10877	3.12173e-10	6159/6161/9150/6176/6124/6168/6170/6130/6132/6352/6138/6157/9349/6228/6146/6194/8665/10762/6137/6230/6233	21	3
GO:0072599	establishment of protein localization to endoplasmic reticulum	6.47634e-13	3.51924e-10	17/183	100/10877	3.47132e-10	6159/6161/6176/6124/6168/6170/6130/6132/6138/6157/9349/6228/6146/6194/6137/6230/6233	17	3
GO:0019083	viral transcription	9.28331e-13	4.20379e-10	20/183	153/10877	4.14654e-10	6159/6161/9150/6176/6124/6168/6170/6130/6132/6352/6138/6157/9349/6228/6146/6194/10762/6137/6230/6233	20	3
GO:0070972	protein localization to endoplasmic reticulum	2.19265e-12	8.51062e-10	18/183	124/10877	8.39472e-10	6159/6161/6176/6124/6168/6170/6130/6132/6138/6157/9349/6228/6146/6194/6137/6230/55973/6233	18	3
GO:0000184	nuclear-transcribed mRNA catabolic process, nonsense-mediated decay	2.78715e-12	9.46587e-10	17/183	109/10877	9.33696e-10	6159/6161/6176/6124/6168/6170/6130/6132/6138/6157/9349/6228/6146/6194/6137/6230/6233	17	3
GO:0006413	translational initiation	8.50288e-12	2.56692e-09	20/183	172/10877	2.53197e-09	6159/6161/6176/6124/6168/6170/6130/6132/6352/6138/6157/9349/6228/6146/84285/6194/8665/6137/6230/6233	20	3
GO:0090150	establishment of protein localization to membrane	1.6129e-10	4.38226e-08	22/183	248/10877	4.32258e-08	7532/5533/6159/54543/6161/6176/6124/6168/6170/6130/6132/10971/6138/6157/9349/6228/6146/6194/9341/6137/6230/6233	22	3
GO:0006612	protein targeting to membrane	6.24557e-10	1.54266e-07	17/183	152/10877	1.52165e-07	6159/6161/6176/6124/6168/6170/6130/6132/6138/6157/9349/6228/6146/6194/6137/6230/6233	17	3
GO:0006402	mRNA catabolic process	9.61038e-10	2.17595e-07	23/183	298/10877	2.14632e-07	79072/6159/6161/6176/6124/6168/6170/5715/6130/6132/6138/6157/9349/8761/6228/6146/5695/6194/3192/6137/6230/6233/5686	23	3
GO:0072594	establishment of protein localization to organelle	3.06809e-09	6.4123e-07	27/183	431/10877	6.32498e-07	7532/5533/6159/54543/6161/6176/1894/6124/6168/6170/6130/3458/6132/10971/9555/6138/6157/9349/6228/6146/5695/6194/285605/10762/6137/6230/6233	27	3
GO:0006401	RNA catabolic process	4.0609e-09	7.88105e-07	23/183	321/10877	7.77373e-07	79072/6159/6161/6176/6124/6168/6170/5715/6130/6132/6138/6157/9349/8761/6228/6146/5695/6194/3192/6137/6230/6233/5686	23	3
GO:0042254	ribosome biogenesis	9.07525e-09	1.64383e-06	21/183	280/10877	1.62144e-06	6159/6161/6176/6124/6168/6170/6130/6132/51187/85865/6138/6157/9349/6228/6146/51388/6194/6137/6230/26156/6233	21	3
GO:0000956	nuclear-transcribed mRNA catabolic process	1.18947e-08	2.01987e-06	17/183	184/10877	1.99236e-06	6159/6161/6176/6124/6168/6170/6130/6132/6138/6157/9349/6228/6146/6194/6137/6230/6233	17	3
GO:0006364	rRNA processing	3.37399e-08	5.39243e-06	18/183	222/10877	5.319e-06	6159/6161/6176/6124/6168/6170/6130/6132/6138/6157/9349/6228/6146/6194/6137/6230/26156/6233	18	3
GO:0016072	rRNA metabolic process	3.67124e-08	5.54154e-06	19/183	249/10877	5.46607e-06	6159/6161/6176/6124/6168/6170/6130/6132/9555/6138/6157/9349/6228/6146/6194/6137/6230/26156/6233	19	3
GO:0006605	protein targeting	4.89044e-08	6.99333e-06	22/183	337/10877	6.89809e-06	7532/6159/54543/6161/6176/6124/6168/6170/6130/6132/10971/6138/6157/9349/6228/6146/5695/6194/285605/6137/6230/6233	22	3
GO:0002181	cytoplasmic translation	7.5714e-08	1.02857e-05	11/183	79/10877	1.01457e-05	6159/6161/6176/6124/6170/1938/6132/6138/6157/6228/6146	11	3
GO:0072657	protein localization to membrane	1.50107e-07	1.94209e-05	25/183	453/10877	1.91565e-05	7532/5533/6159/54543/6161/3689/6176/6124/6168/6170/8673/6130/3458/6132/10971/6138/6157/9349/6228/6146/6194/9341/6137/6230/6233	25	3
GO:0022613	ribonucleoprotein complex biogenesis	2.39461e-07	2.95734e-05	23/183	400/10877	2.91707e-05	6159/6161/6176/6124/6168/6170/6130/6132/51187/85865/55239/6138/6157/9349/6228/6146/51388/6194/10946/6137/6230/26156/6233	23	3
GO:0034470	ncRNA processing	7.15208e-07	8.44879e-05	20/183	331/10877	8.33373e-05	6159/6161/6176/51493/6124/6168/6170/6130/6132/6138/6157/9349/6228/6146/51605/6194/6137/6230/26156/6233	20	3
GO:0034655	nucleobase-containing compound catabolic process	9.55701e-07	0.000108193	25/183	500/10877	0.00010672	79072/6159/6161/6176/6124/6168/6170/5715/6130/6132/53343/6138/6157/9349/8761/6228/6146/5695/6194/3192/10762/6137/6230/6233/5686	25	3
GO:0034660	ncRNA metabolic process	3.40695e-05	0.00370267	21/183	464/10877	0.00365225	6159/6161/6176/51493/6124/6168/6170/6130/6132/9555/6138/6157/9349/6228/6146/51605/6194/6137/6230/26156/6233	21	3
Gene set 38	GSE14790_SUBCLINICAL_PCV2_VS_UNINFECTED_BLOOD_21DPI_DN								1
ID	Description	pvalue	p.adjust	GeneRatio	BgRatio	qvalue	geneID	Count	2
Gene set 39	GSE15211_NORMOTENSIVE_VS_HYPERTENSIVE_AORTIC_VALVE_INTERSTITIAL_CELLS_UP								4
ID	Description	pvalue	p.adjust	GeneRatio	BgRatio	qvalue	geneID	Count	5
GO:0000819	sister chromatid segregation	2.64252e-08	6.69878e-05	17/184	193/10877	6.38932e-05	24137/7153/9055/891/701/9787/10403/83540/10615/147841/64946/9212/324/9493/29127/332/10744	17	6
GO:0051301	cell division	1.44622e-07	0.000122553	26/184	482/10877	0.000116891	54478/983/24137/85417/9133/7153/9055/891/701/10403/22974/83540/10615/5413/147841/259266/5063/9212/54443/3832/324/4750/9493/29127/55964/332	26	6
GO:0140014	mitotic nuclear division	1.57962e-07	0.000122553	17/184	218/10877	0.000116891	24137/9055/891/701/9787/10403/22974/83540/10615/9212/54443/3832/324/9493/29127/332/10744	17	6
GO:0000070	mitotic sister chromatid segregation	2.58631e-07	0.000122553	13/184	129/10877	0.000116891	24137/9055/891/701/9787/10403/83540/10615/9212/324/9493/29127/10744	13	6
GO:0000022	mitotic spindle elongation	3.08721e-07	0.000122553	5/184	10/10877	0.000116891	24137/9055/9212/9493/29127	5	6
GO:0007052	mitotic spindle organization	3.51592e-07	0.000122553	11/184	91/10877	0.000116891	24137/9055/891/10403/22974/83540/9212/3832/9493/29127/332	11	6
GO:0007051	spindle organization	3.69784e-07	0.000122553	13/184	133/10877	0.000116891	24137/9055/891/10403/22974/83540/10615/259266/9212/3832/9493/29127/332	13	6
GO:0008608	attachment of spindle microtubules to kinetochore	4.02987e-07	0.000122553	7/184	29/10877	0.000116891	891/10403/83540/10615/9212/324/29127	7	6
GO:0098813	nuclear chromosome segregation	4.35099e-07	0.000122553	17/184	234/10877	0.000116891	24137/7153/9055/891/701/9787/10403/83540/10615/147841/64946/9212/324/9493/29127/332/10744	17	6
GO:0051231	spindle elongation	5.58235e-07	0.000141512	5/184	11/10877	0.000134975	24137/9055/9212/9493/29127	5	6
GO:0000280	nuclear division	8.16656e-07	0.000182923	19/184	302/10877	0.000174473	24137/7153/9055/891/701/9787/10403/22974/83540/10615/259266/9212/54443/3832/324/9493/29127/332/10744	19	6
GO:0007059	chromosome segregation	8.65908e-07	0.000182923	18/184	274/10877	0.000174473	24137/7153/9055/891/701/9787/10403/83540/10615/147841/64946/9212/3832/324/9493/29127/332/10744	18	6
GO:1902850	microtubule cytoskeleton organization involved in mitosis	1.36945e-06	0.000267042	11/184	104/10877	0.000254706	24137/9055/891/10403/22974/83540/9212/3832/9493/29127/332	11	6
GO:0000226	microtubule cytoskeleton organization	1.52454e-06	0.000276051	21/184	377/10877	0.000263299	983/24137/9055/891/10403/22974/83540/10615/9768/259266/9212/4131/3832/10381/89796/324/9493/29127/332/117178/4869	21	6
GO:0048285	organelle fission	3.65603e-06	0.000617869	19/184	334/10877	0.000589326	24137/7153/9055/891/701/9787/10403/22974/83540/10615/259266/9212/54443/3832/324/9493/29127/332/10744	19	6
GO:2001251	negative regulation of chromosome organization	6.36479e-06	0.00100842	10/184	99/10877	0.000961837	7153/891/80312/701/10403/7520/324/1786/23081/10744	10	6
GO:0061640	cytoskeleton-dependent cytokinesis	8.92517e-06	0.00133044	8/184	62/10877	0.00126898	24137/5413/9212/54443/324/9493/29127/55964	8	6
GO:0051225	spindle assembly	9.44688e-06	0.00133044	9/184	82/10877	0.00126898	24137/22974/10615/259266/9212/3832/9493/29127/332	9	6
GO:0051983	regulation of chromosome segregation	1.27073e-05	0.00169542	9/184	85/10877	0.0016171	891/701/9787/10403/10615/9212/324/29127/10744	9	6
GO:0090307	mitotic spindle assembly	2.48754e-05	0.00315296	7/184	52/10877	0.00300731	24137/22974/9212/3832/9493/29127/332	7	6
GO:0000281	mitotic cytokinesis	2.82554e-05	0.00341084	7/184	53/10877	0.00325327	24137/5413/54443/324/9493/29127/55964	7	6
GO:0033044	regulation of chromosome organization	3.43977e-05	0.00388898	15/184	260/10877	0.00370933	7153/891/80312/701/9787/10403/7520/10782/26147/9212/324/8318/1786/23081/10744	15	6
GO:0051988	regulation of attachment of spindle microtubules to kinetochore	3.52846e-05	0.00388898	4/184	12/10877	0.00370933	891/10615/324/29127	4	6
GO:0000910	cytokinesis	6.4875e-05	0.00685242	10/184	129/10877	0.00653587	24137/9055/5413/5063/9212/54443/324/9493/29127/55964	10	6
GO:0034501	protein localization to kinetochore	6.94836e-05	0.00704564	4/184	14/10877	0.00672016	983/701/10403/9212	4	6
GO:1905819	negative regulation of chromosome separation	7.82779e-05	0.00734943	5/184	27/10877	0.00700992	891/701/10403/324/10744	5	6
GO:2000816	negative regulation of mitotic sister chromatid separation	7.82779e-05	0.00734943	5/184	27/10877	0.00700992	891/701/10403/324/10744	5	6
GO:0031577	spindle checkpoint	9.39969e-05	0.00851008	5/184	28/10877	0.00811695	891/701/10403/9212/324	5	6
GO:0051304	chromosome separation	0.000107587	0.00940459	7/184	65/10877	0.00897014	7153/891/701/9787/10403/324/10744	7	6
GO:0010965	regulation of mitotic sister chromatid separation	0.000115304	0.00974319	6/184	46/10877	0.0092931	891/701/9787/10403/324/10744	6	6
GO:0033048	negative regulation of mitotic sister chromatid segregation	0.00013261	0.0108441	5/184	30/10877	0.0103431	891/701/10403/324/10744	5	6
GO:0051306	mitotic sister chromatid separation	0.00014689	0.0116364	6/184	48/10877	0.0110989	891/701/9787/10403/324/10744	6	6
GO:0032506	cytokinetic process	0.000158763	0.0118372	4/184	17/10877	0.0112904	9212/54443/9493/29127	4	6
GO:0071459	protein localization to chromosome, centromeric region	0.000158763	0.0118372	4/184	17/10877	0.0112904	983/701/10403/9212	4	6
GO:1905818	regulation of chromosome separation	0.00016506	0.0119551	6/184	49/10877	0.0114028	891/701/9787/10403/324/10744	6	6
GO:0033046	negative regulation of sister chromatid segregation	0.000182328	0.012492	5/184	32/10877	0.0119149	891/701/10403/324/10744	5	6
GO:0051985	negative regulation of chromosome segregation	0.000182328	0.012492	5/184	32/10877	0.0119149	891/701/10403/324/10744	5	6
GO:0042775	mitochondrial ATP synthesis coupled electron transport	0.000289002	0.0192795	7/184	76/10877	0.0183889	983/891/4697/10975/4717/4718/9377	7	6
GO:0042773	ATP synthesis coupled electron transport	0.000313427	0.0203727	7/184	77/10877	0.0194316	983/891/4697/10975/4717/4718/9377	7	6
GO:0033047	regulation of mitotic sister chromatid segregation	0.00038302	0.0242739	6/184	57/10877	0.0231525	891/701/9787/10403/324/10744	6	6
GO:0045839	negative regulation of mitotic nuclear division	0.000473713	0.0292893	5/184	39/10877	0.0279363	891/701/10403/324/10744	5	6
GO:1901989	positive regulation of cell cycle phase transition	0.000605135	0.0365242	6/184	62/10877	0.034837	983/891/9787/8318/4869/5962	6	6
GO:0022900	electron transport chain	0.000642178	0.0378458	9/184	141/10877	0.0360975	983/5860/891/4697/4200/10975/4717/4718/9377	9	6
GO:0030071	regulation of mitotic metaphase/anaphase transition	0.000671819	0.0378458	5/184	42/10877	0.0360975	891/701/9787/10403/324	5	6
GO:1902099	regulation of metaphase/anaphase transition of cell cycle	0.000671819	0.0378458	5/184	42/10877	0.0360975	891/701/9787/10403/324	5	6
GO:0000921	septin ring assembly	0.000711032	0.0391841	3/184	11/10877	0.0373739	5413/54443/55964	3	6
GO:0007094	mitotic spindle assembly checkpoint	0.000759145	0.0392741	4/184	25/10877	0.0374598	891/701/10403/324	4	6
GO:0071173	spindle assembly checkpoint	0.000759145	0.0392741	4/184	25/10877	0.0374598	891/701/10403/324	4	6
GO:0071174	mitotic spindle checkpoint	0.000759145	0.0392741	4/184	25/10877	0.0374598	891/701/10403/324	4	6
GO:0033045	regulation of sister chromatid segregation	0.000779782	0.0395349	6/184	65/10877	0.0377086	891/701/9787/10403/324/10744	6	6
GO:0022904	respiratory electron transport chain	0.000865246	0.0414098	7/184	91/10877	0.0394969	983/891/4697/10975/4717/4718/9377	7	6
GO:0045841	negative regulation of mitotic metaphase/anaphase transition	0.000885414	0.0414098	4/184	26/10877	0.0394969	891/701/10403/324	4	6
GO:1902100	negative regulation of metaphase/anaphase transition of cell cycle	0.000885414	0.0414098	4/184	26/10877	0.0394969	891/701/10403/324	4	6
GO:0007091	metaphase/anaphase transition of mitotic cell cycle	0.00092622	0.0414098	5/184	45/10877	0.0394969	891/701/9787/10403/324	5	6
GO:0044784	metaphase/anaphase transition of cell cycle	0.00092622	0.0414098	5/184	45/10877	0.0394969	891/701/9787/10403/324	5	6
GO:0051784	negative regulation of nuclear division	0.00092622	0.0414098	5/184	45/10877	0.0394969	891/701/10403/324/10744	5	6
GO:0031106	septin ring organization	0.000936281	0.0414098	3/184	12/10877	0.0394969	5413/54443/55964	3	6
GO:0090068	positive regulation of cell cycle process	0.000947444	0.0414098	11/184	212/10877	0.0394969	983/891/9787/10403/10615/9212/9493/29127/8318/4869/5962	11	6
GO:0006890	retrograde vesicle-mediated transport, Golgi to ER	0.000991025	0.0425805	6/184	68/10877	0.0406134	24137/5861/56992/3832/9493/29127	6	6
Gene set 40	GSE15211_NORMOTENSIVE_VS_HYPERTENSIVE_AORTIC_VALVE_INTERSTITIAL_CELLS_DN								4
ID	Description	pvalue	p.adjust	GeneRatio	BgRatio	qvalue	geneID	Count	5
Gene set 41	GSE15256_ANTIBIOTIC-TREATED_ISOLATOR-HOUSED_VS_INDOOR-HOUSED_NEONATAL_JEJUNUM_UP								1
ID	Description	pvalue	p.adjust	GeneRatio	BgRatio	qvalue	geneID	Count	2
GO:0032543	mitochondrial translation	7.66476e-13	1.33966e-09	18/186	115/10877	1.30561e-09	122704/55699/51263/29074/64975/55052/64983/6182/64979/84311/64976/78988/708/3396/90480/51116/4701/84545	18	3
GO:0140053	mitochondrial gene expression	1.23376e-12	1.33966e-09	19/186	135/10877	1.30561e-09	122704/55699/51263/29074/64975/55052/64983/6182/64979/84311/64976/78988/708/3396/90480/55006/51116/4701/84545	19	3
GO:0006414	translational elongation	1.62844e-12	1.33966e-09	18/186	120/10877	1.30561e-09	122704/51263/29074/64975/55052/64983/6182/64979/9343/84311/6181/64976/78988/3396/90480/51116/6176/84545	18	3
GO:0070125	mitochondrial translational elongation	4.4593e-12	2.20111e-09	15/186	80/10877	2.14516e-09	122704/51263/29074/64975/55052/64983/6182/64979/84311/64976/78988/3396/90480/51116/84545	15	3
GO:0070126	mitochondrial translational termination	4.4593e-12	2.20111e-09	15/186	80/10877	2.14516e-09	122704/51263/29074/64975/55052/64983/6182/64979/84311/64976/78988/3396/90480/51116/84545	15	3
GO:0006415	translational termination	2.24284e-11	9.22553e-09	15/186	89/10877	8.99102e-09	122704/51263/29074/64975/55052/64983/6182/64979/84311/64976/78988/3396/90480/51116/84545	15	3
GO:0006695	cholesterol biosynthetic process	4.49696e-09	1.5855e-06	11/186	60/10877	1.5452e-06	2224/10682/1595/50814/3638/1718/2222/2194/3422/4598/6309	11	3
GO:1902653	secondary alcohol biosynthetic process	6.47438e-09	1.99735e-06	11/186	62/10877	1.94657e-06	2224/10682/1595/50814/3638/1718/2222/2194/3422/4598/6309	11	3
GO:0016126	sterol biosynthetic process	1.28926e-08	3.53543e-06	11/186	66/10877	3.44556e-06	2224/10682/1595/50814/3638/1718/2222/2194/3422/4598/6309	11	3
GO:0008203	cholesterol metabolic process	3.13022e-08	7.72539e-06	13/186	107/10877	7.52901e-06	2224/10682/1595/27329/50814/3638/1718/2222/2194/3949/3422/4598/6309	13	3
GO:1902652	secondary alcohol metabolic process	5.4498e-08	1.22274e-05	13/186	112/10877	1.19165e-05	2224/10682/1595/27329/50814/3638/1718/2222/2194/3949/3422/4598/6309	13	3
GO:0016125	sterol metabolic process	1.12865e-07	2.22045e-05	13/186	119/10877	2.16401e-05	2224/10682/1595/27329/50814/3638/1718/2222/2194/3949/3422/4598/6309	13	3
GO:0043624	cellular protein complex disassembly	1.16961e-07	2.22045e-05	15/186	163/10877	2.16401e-05	122704/51263/29074/64975/55052/64983/6182/64979/84311/64976/78988/3396/90480/51116/84545	15	3
GO:0046165	alcohol biosynthetic process	4.36475e-07	7.69443e-05	12/186	112/10877	7.49884e-05	2224/10682/1595/50814/3638/1718/2222/2194/3613/3422/4598/6309	12	3
GO:0006694	steroid biosynthetic process	9.67491e-07	0.000159185	13/186	143/10877	0.000155138	2224/51144/10682/1595/50814/3638/1718/2222/2194/3422/11218/4598/6309	13	3
GO:0090181	regulation of cholesterol metabolic process	1.32257e-06	0.000204006	8/186	48/10877	0.00019882	2224/1595/2222/2194/3949/3422/4598/6309	8	3
GO:0008202	steroid metabolic process	1.7638e-06	0.000256063	16/186	228/10877	0.000249553	10901/2224/51144/10682/1595/27329/50814/3638/1718/2222/2194/3949/3422/11218/4598/6309	16	3
GO:0006119	oxidative phosphorylation	2.22036e-06	0.000297762	11/186	108/10877	0.000290192	538/4713/1329/518/517/4705/7384/4715/4728/4701/539	11	3
GO:0006066	alcohol metabolic process	2.34386e-06	0.000297762	16/186	233/10877	0.000290192	10901/2224/10682/1595/27329/50814/3638/1718/2222/2194/3613/51805/3949/3422/4598/6309	16	3
GO:0050810	regulation of steroid biosynthetic process	2.41298e-06	0.000297762	9/186	69/10877	0.000290192	2224/1595/3638/2222/2194/3422/11218/4598/6309	9	3
GO:0019218	regulation of steroid metabolic process	2.93779e-06	0.00034526	10/186	90/10877	0.000336484	2224/1595/3638/2222/2194/3949/3422/11218/4598/6309	10	3
GO:1901617	organic hydroxy compound biosynthetic process	3.54517e-06	0.000380329	14/186	186/10877	0.000370661	2224/10682/1595/8566/50814/3638/1718/2222/2194/3613/3422/4598/1652/6309	14	3
GO:1901615	organic hydroxy compound metabolic process	3.68821e-06	0.000380329	20/186	362/10877	0.000370661	10901/2224/10682/1595/538/8566/27329/50814/3638/1718/2222/2194/3613/51805/3949/3422/4598/1652/6309/57380	20	3
GO:0045540	regulation of cholesterol biosynthetic process	3.6985e-06	0.000380329	7/186	39/10877	0.000370661	2224/1595/2222/2194/3422/4598/6309	7	3
GO:0032984	protein-containing complex disassembly	4.49368e-06	0.000443616	16/186	245/10877	0.000432339	122704/51263/29074/64975/55052/64983/6182/64979/84311/64976/78988/3396/90480/8562/51116/84545	16	3
GO:0009123	nucleoside monophosphate metabolic process	7.20784e-06	0.00068419	17/186	284/10877	0.000666798	1741/538/4713/2023/1329/471/518/517/4705/51020/7384/1841/4715/4728/2027/4701/539	17	3
GO:1990542	mitochondrial transmembrane transport	7.56585e-06	0.000691575	9/186	79/10877	0.000673995	26519/29074/1329/80273/518/517/10245/57380/539	9	3
GO:1902930	regulation of alcohol biosynthetic process	2.34145e-05	0.00206382	7/186	51/10877	0.00201136	2224/1595/2222/2194/3422/4598/6309	7	3
GO:0006091	generation of precursor metabolites and energy	4.23908e-05	0.00354518	19/186	393/10877	0.00345506	22868/3421/538/4713/2023/1329/10539/4191/2673/518/517/4705/7384/10327/4715/4728/2027/4701/539	19	3
GO:0009126	purine nucleoside monophosphate metabolic process	4.45303e-05	0.00354518	15/186	263/10877	0.00345506	1741/538/4713/2023/1329/471/518/517/4705/7384/4715/4728/2027/4701/539	15	3
GO:0009167	purine ribonucleoside monophosphate metabolic process	4.45303e-05	0.00354518	15/186	263/10877	0.00345506	1741/538/4713/2023/1329/471/518/517/4705/7384/4715/4728/2027/4701/539	15	3
GO:0009161	ribonucleoside monophosphate metabolic process	7.10505e-05	0.00547977	15/186	274/10877	0.00534047	1741/538/4713/2023/1329/471/518/517/4705/7384/4715/4728/2027/4701/539	15	3
GO:0009141	nucleoside triphosphate metabolic process	7.71338e-05	0.00576867	15/186	276/10877	0.00562203	4831/538/4713/2023/1329/518/517/4705/7384/1841/4715/4728/2027/4701/539	15	3
GO:0046890	regulation of lipid biosynthetic process	9.1912e-05	0.00667173	10/186	133/10877	0.00650213	2224/1595/3638/2222/2194/3949/3422/11218/4598/6309	10	3
GO:0009205	purine ribonucleoside triphosphate metabolic process	0.000111016	0.00782818	14/186	253/10877	0.00762919	4831/538/4713/2023/1329/518/517/4705/7384/4715/4728/2027/4701/539	14	3
GO:0009144	purine nucleoside triphosphate metabolic process	0.000142183	0.00948402	14/186	259/10877	0.00924294	4831/538/4713/2023/1329/518/517/4705/7384/4715/4728/2027/4701/539	14	3
GO:0009199	ribonucleoside triphosphate metabolic process	0.000142183	0.00948402	14/186	259/10877	0.00924294	4831/538/4713/2023/1329/518/517/4705/7384/4715/4728/2027/4701/539	14	3
GO:0046034	ATP metabolic process	0.000158738	0.0103096	13/186	230/10877	0.0100475	538/4713/2023/1329/518/517/4705/7384/4715/4728/2027/4701/539	13	3
GO:0045333	cellular respiration	0.000199081	0.0125982	10/186	146/10877	0.012278	22868/3421/4713/1329/4191/4705/7384/4715/4728/4701	10	3
GO:0042776	mitochondrial ATP synthesis coupled proton transport	0.000262437	0.0156084	4/186	19/10877	0.0152116	1329/518/517/539	4	3
GO:0007005	mitochondrion organization	0.000265621	0.0156084	19/186	452/10877	0.0152116	9868/2746/7416/538/26519/6742/5245/4713/80273/518/517/4705/55735/4715/4728/10133/10245/4701/539	19	3
GO:0022411	cellular component disassembly	0.000265621	0.0156084	19/186	452/10877	0.0152116	122704/80279/51263/7416/29074/64975/55052/64983/6182/64979/84311/64976/78988/3396/90480/10133/8562/51116/84545	19	3
GO:0042775	mitochondrial ATP synthesis coupled electron transport	0.000308667	0.0177161	7/186	76/10877	0.0172657	4713/1329/4705/7384/4715/4728/4701	7	3
GO:0008299	isoprenoid biosynthetic process	0.000323686	0.0181558	4/186	20/10877	0.0176943	2224/2222/3422/4598	4	3
GO:0042773	ATP synthesis coupled electron transport	0.000334701	0.0182248	7/186	77/10877	0.0177615	4713/1329/4705/7384/4715/4728/4701	7	3
GO:0007007	inner mitochondrial membrane organization	0.000339685	0.0182248	5/186	36/10877	0.0177615	26519/518/517/55735/539	5	3
GO:0019693	ribose phosphate metabolic process	0.000418356	0.0219681	18/186	431/10877	0.0214097	4831/1741/538/5226/4713/2023/1329/7086/471/518/517/4705/7384/4715/4728/2027/4701/539	18	3
GO:0015985	energy coupled proton transport, down electrochemical gradient	0.000568336	0.0286256	4/186	23/10877	0.0278979	1329/518/517/539	4	3
GO:0015986	ATP synthesis coupled proton transport	0.000568336	0.0286256	4/186	23/10877	0.0278979	1329/518/517/539	4	3
GO:0006120	mitochondrial electron transport, NADH to ubiquinone	0.000630183	0.0311058	5/186	41/10877	0.0303151	4713/4705/4715/4728/4701	5	3
GO:0022900	electron transport chain	0.000694052	0.0335867	9/186	141/10877	0.0327329	4713/1329/10539/4705/7384/10327/4715/4728/4701	9	3
GO:0051186	cofactor metabolic process	0.000810677	0.038476	18/186	456/10877	0.0374979	81689/51144/4682/8566/5226/2023/7086/10539/4191/471/4257/2194/10327/51805/4598/2027/5052/9962	18	3
GO:0022904	respiratory electron transport chain	0.000921939	0.0429311	7/186	91/10877	0.0418397	4713/1329/4705/7384/4715/4728/4701	7	3
GO:0042407	cristae formation	0.00106787	0.048762	4/186	27/10877	0.0475225	518/517/55735/539	4	3
GO:0022618	ribonucleoprotein complex assembly	0.00108667	0.048762	10/186	181/10877	0.0475225	51065/22868/10946/55052/79833/6169/708/11218/8562/1660	10	3
GO:0046364	monosaccharide biosynthetic process	0.00113191	0.0498847	6/186	69/10877	0.0486166	5226/2023/7086/4191/10327/2027	6	3
Gene set 42	GSE15256_ANTIBIOTIC-TREATED_ISOLATOR-HOUSED_VS_INDOOR-HOUSED_NEONATAL_JEJUNUM_DN								1
ID	Description	pvalue	p.adjust	GeneRatio	BgRatio	qvalue	geneID	Count	2
GO:0035282	segmentation	1.11955e-05	0.0273953	7/138	61/10877	0.0251721	3234/5046/4222/23509/85407/4040/51176	7	3
Gene set 43	GSE15256_ANTIBIOTIC-TREATED_ISOLATOR-HOUSED_VS_INDOOR-HOUSED_WEANING-AGE_JEJUNUM_UP								4
ID	Description	pvalue	p.adjust	GeneRatio	BgRatio	qvalue	geneID	Count	5
GO:0006695	cholesterol biosynthetic process	1.76702e-19	5.15793e-16	19/190	60/10877	4.90488e-16	31/1717/1595/3638/6721/6309/2222/6307/2194/6319/2224/10682/1718/3157/6713/47/3156/50814/51478	19	6
GO:1902653	secondary alcohol biosynthetic process	3.59025e-19	5.23998e-16	19/190	62/10877	4.9829e-16	31/1717/1595/3638/6721/6309/2222/6307/2194/6319/2224/10682/1718/3157/6713/47/3156/50814/51478	19	6
GO:0016126	sterol biosynthetic process	1.36565e-18	1.32877e-15	19/190	66/10877	1.26358e-15	31/1717/1595/3638/6721/6309/2222/6307/2194/6319/2224/10682/1718/3157/6713/47/3156/50814/51478	19	6
GO:0008203	cholesterol metabolic process	1.0784e-16	7.86966e-14	21/190	107/10877	7.48356e-14	31/1717/1595/3638/6721/6309/2222/6307/2194/6319/2224/10682/1718/3157/6713/3949/4864/47/3156/50814/51478	21	6
GO:1902652	secondary alcohol metabolic process	2.8855e-16	1.68456e-13	21/190	112/10877	1.60191e-13	31/1717/1595/3638/6721/6309/2222/6307/2194/6319/2224/10682/1718/3157/6713/3949/4864/47/3156/50814/51478	21	6
GO:0016125	sterol metabolic process	1.05156e-15	5.11583e-13	21/190	119/10877	4.86484e-13	31/1717/1595/3638/6721/6309/2222/6307/2194/6319/2224/10682/1718/3157/6713/3949/4864/47/3156/50814/51478	21	6
GO:0046165	alcohol biosynthetic process	4.12417e-15	1.71978e-12	20/190	112/10877	1.6354e-12	31/1717/1595/3638/6721/6309/2222/6307/2194/6319/2224/10682/1718/3157/6713/2643/47/3156/50814/51478	20	6
GO:0090181	regulation of cholesterol metabolic process	1.05589e-12	3.85268e-10	13/190	48/10877	3.66367e-10	31/1717/1595/6721/6309/2222/2194/6319/2224/3157/6713/3949/3156	13	6
GO:0045540	regulation of cholesterol biosynthetic process	1.47629e-12	4.7881e-10	12/190	39/10877	4.55319e-10	31/1717/1595/6721/6309/2222/2194/6319/2224/3157/6713/3156	12	6
GO:0006066	alcohol metabolic process	2.0227e-12	5.90425e-10	24/190	233/10877	5.61458e-10	31/1717/1595/3638/6721/6309/2222/6307/2194/6319/2224/10682/1718/3157/6713/3949/2643/4864/47/3156/50814/51478/51573/55902	24	6
GO:0006694	steroid biosynthetic process	5.1772e-12	1.37384e-09	19/190	143/10877	1.30644e-09	31/1717/1595/3638/6721/6309/2222/6307/2194/6319/2224/10682/1718/3157/6713/47/3156/50814/51478	19	6
GO:1902930	regulation of alcohol biosynthetic process	4.9916e-11	1.21421e-08	12/190	51/10877	1.15464e-08	31/1717/1595/6721/6309/2222/2194/6319/2224/3157/6713/3156	12	6
GO:0008202	steroid metabolic process	6.55429e-11	1.47169e-08	22/190	228/10877	1.39949e-08	31/1717/1595/3638/6721/6309/2222/6307/2194/6319/2224/10682/1718/3157/6713/3949/4864/47/3156/50814/51478/1312	22	6
GO:1901617	organic hydroxy compound biosynthetic process	7.22604e-11	1.50663e-08	20/190	186/10877	1.43271e-08	31/1717/1595/3638/6721/6309/2222/6307/2194/6319/2224/10682/1718/3157/6713/2643/47/3156/50814/51478	20	6
GO:1901615	organic hydroxy compound metabolic process	1.51736e-10	2.80185e-08	27/190	362/10877	2.66439e-08	31/1717/1595/3638/6721/6309/2222/6307/2194/6319/2224/10682/1718/3157/6713/3949/2643/4864/47/5208/3156/50814/3939/51478/51573/55902/1312	27	6
GO:0050810	regulation of steroid biosynthetic process	1.53579e-10	2.80185e-08	13/190	69/10877	2.66439e-08	31/1717/1595/3638/6721/6309/2222/2194/6319/2224/3157/6713/3156	13	6
GO:0019218	regulation of steroid metabolic process	4.31373e-10	7.40693e-08	14/190	90/10877	7.04353e-08	31/1717/1595/3638/6721/6309/2222/2194/6319/2224/3157/6713/3949/3156	14	6
GO:0046890	regulation of lipid biosynthetic process	9.9033e-09	1.60598e-06	15/190	133/10877	1.52719e-06	31/1717/1595/3638/6721/6309/2222/2194/6319/2224/3157/6713/718/3949/3156	15	6
GO:0019216	regulation of lipid metabolic process	5.88668e-08	9.0438e-06	21/190	300/10877	8.60009e-06	31/1717/1595/3638/6721/6309/2222/2194/6319/2224/3157/6713/718/3949/3172/3156/51599/23054/9612/57546/153090	21	6
GO:0062012	regulation of small molecule metabolic process	1.42924e-07	2.08598e-05	23/190	374/10877	1.98364e-05	31/1717/1595/3037/3638/6721/6309/2222/2194/2982/6319/2224/6774/4763/3157/1950/6713/3949/5208/3156/9612/57546/1312	23	6
GO:0009108	coenzyme biosynthetic process	3.49536e-06	0.000485855	15/190	208/10877	0.000462019	31/2194/80201/6319/6774/5315/2643/47/5208/6576/5214/51117/3939/55902/57546	15	6
GO:0035384	thioester biosynthetic process	9.85515e-06	0.00125075	7/190	44/10877	0.00118938	31/2194/6319/47/6576/55902/57546	7	6
GO:0071616	acyl-CoA biosynthetic process	9.85515e-06	0.00125075	7/190	44/10877	0.00118938	31/2194/6319/47/6576/55902/57546	7	6
GO:0006084	acetyl-CoA metabolic process	1.0994e-05	0.00130714	6/190	30/10877	0.00124301	31/2194/3157/47/55902/57546	6	6
GO:0006732	coenzyme metabolic process	1.11951e-05	0.00130714	18/190	318/10877	0.00124301	31/2194/80201/6319/6774/5315/3157/2643/47/5208/3156/5226/6576/5214/51117/3939/55902/57546	18	6
GO:0048708	astrocyte differentiation	3.47182e-05	0.00389779	7/190	53/10877	0.00370655	4851/6774/4763/3976/3949/3845/5595	7	6
GO:0051188	cofactor biosynthetic process	3.9938e-05	0.00431774	15/190	255/10877	0.00410591	31/2194/80201/6319/6774/5315/2643/47/5208/6576/5214/51117/3939/55902/57546	15	6
GO:0006637	acyl-CoA metabolic process	7.40463e-05	0.00745315	8/190	80/10877	0.00708748	31/2194/6319/3157/47/6576/55902/57546	8	6
GO:0035383	thioester metabolic process	7.40463e-05	0.00745315	8/190	80/10877	0.00708748	31/2194/6319/3157/47/6576/55902/57546	8	6
GO:0046949	fatty-acyl-CoA biosynthetic process	9.11287e-05	0.00886682	5/190	27/10877	0.0084318	31/2194/6319/47/6576	5	6
GO:0016053	organic acid biosynthetic process	0.000131564	0.0119573	16/190	316/10877	0.0113706	31/3037/3638/2194/80201/6319/4259/6774/5315/1950/2643/47/5208/5214/3939/55902	16	6
GO:0046394	carboxylic acid biosynthetic process	0.000131564	0.0119573	16/190	316/10877	0.0113706	31/3037/3638/2194/80201/6319/4259/6774/5315/1950/2643/47/5208/5214/3939/55902	16	6
GO:0032787	monocarboxylic acid metabolic process	0.000137824	0.0119573	20/190	456/10877	0.0113706	31/3638/6307/2194/80201/6319/6774/5315/718/4864/47/5208/5226/5214/3939/5595/55862/55902/57546/1892	20	6
GO:0071404	cellular response to low-density lipoprotein particle stimulus	0.000139276	0.0119573	4/190	16/10877	0.0113706	6721/3157/3949/4864	4	6
GO:0043405	regulation of MAP kinase activity	0.000177911	0.0148377	14/190	259/10877	0.0141098	23043/4486/4763/4296/1950/1847/7335/3156/3845/10961/5595/7855/153090/8325	14	6
GO:0043406	positive regulation of MAP kinase activity	0.000286521	0.0232321	12/190	208/10877	0.0220923	23043/4486/4296/1950/1847/7335/3845/10961/5595/7855/153090/8325	12	6
GO:0071900	regulation of protein serine/threonine kinase activity	0.000312955	0.0246896	17/190	376/10877	0.0234783	23043/4486/4763/4296/1950/1847/51719/7335/836/3156/3845/10961/84152/5595/7855/153090/8325	17	6
GO:0035337	fatty-acyl-CoA metabolic process	0.000327218	0.0251355	5/190	35/10877	0.0239023	31/2194/6319/47/6576	5	6
GO:0008299	isoprenoid biosynthetic process	0.000351018	0.0256155	4/190	20/10877	0.0243588	2222/2224/3157/3156	4	6
GO:0055094	response to lipoprotein particle	0.000351018	0.0256155	4/190	20/10877	0.0243588	6721/3157/3949/4864	4	6
GO:0051186	cofactor metabolic process	0.000389035	0.0276974	19/190	456/10877	0.0263385	31/2194/80201/6319/6774/5315/3157/2643/47/5208/3156/5226/6576/5214/51117/3939/55902/23474/57546	19	6
GO:0071402	cellular response to lipoprotein particle stimulus	0.000427725	0.0297269	4/190	21/10877	0.0282685	6721/3157/3949/4864	4	6
GO:0031098	stress-activated protein kinase signaling cascade	0.000538303	0.0357115	12/190	223/10877	0.0339595	23043/260425/222643/148170/4296/7335/3156/5595/7855/153090/8325/10298	12	6
GO:0072330	monocarboxylic acid biosynthetic process	0.000538303	0.0357115	12/190	223/10877	0.0339595	31/3638/2194/80201/6319/6774/5315/47/5208/5214/3939/55902	12	6
GO:0051403	stress-activated MAPK cascade	0.000674163	0.0437307	11/190	197/10877	0.0415852	23043/260425/222643/148170/4296/7335/3156/5595/7855/153090/8325	11	6
GO:0048710	regulation of astrocyte differentiation	0.00072893	0.0462554	4/190	24/10877	0.043986	4851/4763/3976/3949	4	6
Gene set 44	GSE15256_ANTIBIOTIC-TREATED_ISOLATOR-HOUSED_VS_INDOOR-HOUSED_WEANING-AGE_JEJUNUM_DN								4
ID	Description	pvalue	p.adjust	GeneRatio	BgRatio	qvalue	geneID	Count	5
GO:0022613	ribonucleoprotein complex biogenesis	1.59498e-07	0.000361742	23/179	400/10877	0.000361742	26574/8664/55164/10813/2971/6122/23369/25879/5394/255967/6733/27042/50628/25929/9188/9136/6430/2091/6210/27316/54093/4839/6631	23	6
GO:0022618	ribonucleoprotein complex assembly	4.33784e-05	0.0394373	12/179	181/10877	0.0394373	8664/55164/6122/23369/255967/6733/50628/25929/6430/27316/4839/6631	12	6
GO:0042254	ribosome biogenesis	5.85418e-05	0.0394373	15/179	280/10877	0.0394373	26574/55164/10813/2971/6122/25879/5394/27042/50628/9188/9136/2091/6210/54093/4839	15	6
GO:0071826	ribonucleoprotein complex subunit organization	6.95543e-05	0.0394373	12/179	190/10877	0.0394373	8664/55164/6122/23369/255967/6733/50628/25929/6430/27316/4839/6631	12	6
Gene set 45	GSE15256_ANTIBIOTIC-TREATED_ISOLATOR-HOUSED_VS_OUTDOOR-HOUSED_WEANING-AGE_JEJUNUM_UP								1
ID	Description	pvalue	p.adjust	GeneRatio	BgRatio	qvalue	geneID	Count	2
GO:0060333	interferon-gamma-mediated signaling pathway	1.17801e-09	3.10287e-06	11/146	67/10877	2.86938e-06	3106/3107/567/7726/3105/3135/10437/83666/6737/2209/3383	11	3
GO:0034341	response to interferon-gamma	2.83226e-09	3.73009e-06	14/146	134/10877	3.4494e-06	3106/6347/3107/567/7726/3105/3135/10437/83666/6737/2209/58191/29927/3383	14	3
GO:0002455	humoral immune response mediated by circulating immunoglobulin	3.02491e-08	2.65587e-05	8/146	38/10877	2.45601e-05	3494/710/715/3537/713/712/2213/714	8	3
GO:0071346	cellular response to interferon-gamma	6.02348e-08	3.96646e-05	12/146	119/10877	3.66798e-05	3106/6347/3107/567/7726/3105/3135/10437/83666/6737/2209/3383	12	3
GO:0006695	cholesterol biosynthetic process	9.12179e-08	4.80536e-05	9/146	60/10877	4.44375e-05	31/1718/1717/6319/2194/47/3638/10682/6309	9	3
GO:1902653	secondary alcohol biosynthetic process	1.22358e-07	5.13557e-05	9/146	62/10877	4.74911e-05	31/1718/1717/6319/2194/47/3638/10682/6309	9	3
GO:0006958	complement activation, classical pathway	1.36481e-07	5.13557e-05	7/146	31/10877	4.74911e-05	3494/710/715/3537/713/712/714	7	3
GO:0002460	adaptive immune response based on somatic recombination of immune receptors built from immunoglobulin superfamily domains	2.01869e-07	6.24287e-05	13/146	159/10877	5.77309e-05	567/3494/710/6774/715/7037/3537/713/712/2213/90865/714/3383	13	3
GO:0016126	sterol biosynthetic process	2.1331e-07	6.24287e-05	9/146	66/10877	5.77309e-05	31/1718/1717/6319/2194/47/3638/10682/6309	9	3
GO:0002449	lymphocyte mediated immunity	1.01715e-06	0.000258769	12/146	154/10877	0.000239297	567/3494/710/715/10225/7037/3537/713/712/2213/714/3383	12	3
GO:0002697	regulation of immune effector process	1.08066e-06	0.000258769	15/146	247/10877	0.000239297	151636/567/710/83666/715/10225/7037/3537/713/712/942/2213/90865/714/10077	15	3
GO:0016064	immunoglobulin mediated immune response	1.91144e-06	0.000387286	9/146	85/10877	0.000358143	3494/710/715/7037/3537/713/712/2213/714	9	3
GO:0019724	B cell mediated immunity	1.91144e-06	0.000387286	9/146	85/10877	0.000358143	3494/710/715/7037/3537/713/712/2213/714	9	3
GO:0002250	adaptive immune response	2.57831e-06	0.00048509	14/146	231/10877	0.000448586	567/3494/710/6774/715/7037/3537/713/712/942/2213/90865/714/3383	14	3
GO:0002920	regulation of humoral immune response	4.80188e-06	0.000843211	7/146	51/10877	0.000779758	710/715/3537/713/712/2213/714	7	3
GO:0006956	complement activation	7.10276e-06	0.00116929	7/146	54/10877	0.0010813	3494/710/715/3537/713/712/714	7	3
GO:0008203	cholesterol metabolic process	1.29623e-05	0.00200839	9/146	107/10877	0.00185726	31/1718/1717/6319/2194/47/3638/10682/6309	9	3
GO:0030449	regulation of complement activation	1.39043e-05	0.00202592	6/146	40/10877	0.00187346	710/715/3537/713/712/714	6	3
GO:0048871	multicellular organismal homeostasis	1.46137e-05	0.00202592	13/146	233/10877	0.00187346	31/567/3494/6774/4891/7037/3037/5879/2488/1907/109/596/128866	13	3
GO:2000257	regulation of protein activation cascade	1.61091e-05	0.00212156	6/146	41/10877	0.00196191	710/715/3537/713/712/714	6	3
GO:0002526	acute inflammatory response	1.74566e-05	0.00214929	9/146	111/10877	0.00198755	710/6774/715/3537/713/712/2213/714/3383	9	3
GO:0046165	alcohol biosynthetic process	1.87675e-05	0.00214929	9/146	112/10877	0.00198755	31/1718/1717/6319/2194/47/3638/10682/6309	9	3
GO:1902652	secondary alcohol metabolic process	1.87675e-05	0.00214929	9/146	112/10877	0.00198755	31/1718/1717/6319/2194/47/3638/10682/6309	9	3
GO:0006694	steroid biosynthetic process	2.17339e-05	0.0023853	10/146	143/10877	0.0022058	31/1718/1717/6319/2194/47/3638/2488/10682/6309	10	3
GO:0010039	response to iron ion	2.58842e-05	0.00262227	5/146	27/10877	0.00242494	567/4891/712/596/6531	5	3
GO:0046949	fatty-acyl-CoA biosynthetic process	2.58842e-05	0.00262227	5/146	27/10877	0.00242494	31/6319/2194/47/2182	5	3
GO:1901570	fatty acid derivative biosynthetic process	2.73102e-05	0.00266426	7/146	66/10877	0.00246377	31/6319/2194/47/6916/1907/2182	7	3
GO:0016125	sterol metabolic process	3.05132e-05	0.00281773	9/146	119/10877	0.00260569	31/1718/1717/6319/2194/47/3638/10682/6309	9	3
GO:0006959	humoral immune response	3.10228e-05	0.00281773	10/146	149/10877	0.00260569	6347/3494/710/715/3537/713/712/596/2213/714	10	3
GO:0002673	regulation of acute inflammatory response	3.32444e-05	0.0028247	7/146	68/10877	0.00261214	710/715/3537/713/712/2213/714	7	3
GO:0042590	antigen processing and presentation of exogenous peptide antigen via MHC class I	3.32444e-05	0.0028247	7/146	68/10877	0.00261214	3106/3107/567/3105/3135/10437/2209	7	3
GO:0072376	protein activation cascade	4.41015e-05	0.00359429	7/146	71/10877	0.00332382	3494/710/715/3537/713/712/714	7	3
GO:0072330	monocarboxylic acid biosynthetic process	4.5031e-05	0.00359429	12/146	223/10877	0.00332382	31/6319/2194/3939/47/6774/3101/3638/5208/9415/6916/1907	12	3
GO:0006633	fatty acid biosynthetic process	5.712e-05	0.00442512	8/146	100/10877	0.00409212	31/6319/2194/47/3638/9415/6916/1907	8	3
GO:0035337	fatty-acyl-CoA metabolic process	9.54715e-05	0.00718491	5/146	35/10877	0.00664424	31/6319/2194/47/2182	5	3
GO:0002474	antigen processing and presentation of peptide antigen via MHC class I	0.000103129	0.00754561	7/146	81/10877	0.0069778	3106/3107/567/3105/3135/10437/2209	7	3
GO:0019882	antigen processing and presentation	0.000152285	0.0104189	10/146	180/10877	0.00963491	3106/3107/567/3105/3135/10437/2209/2213/10890/3383	10	3
GO:0060337	type I interferon signaling pathway	0.000159587	0.0104189	6/146	61/10877	0.00963491	3106/3107/3105/3135/81030/3437	6	3
GO:0071357	cellular response to type I interferon	0.000159587	0.0104189	6/146	61/10877	0.00963491	3106/3107/3105/3135/81030/3437	6	3
GO:0051188	cofactor biosynthetic process	0.00016212	0.0104189	12/146	255/10877	0.00963491	31/6319/2194/3939/47/6774/83666/4891/3101/5208/211/2182	12	3
GO:0045540	regulation of cholesterol biosynthetic process	0.000162178	0.0104189	5/146	39/10877	0.00963491	31/1717/6319/2194/6309	5	3
GO:1901617	organic hydroxy compound biosynthetic process	0.000199081	0.0124852	10/146	186/10877	0.0115457	31/1718/1717/6319/2194/47/3638/10682/6531/6309	10	3
GO:0002479	antigen processing and presentation of exogenous peptide antigen via MHC class I, TAP-dependent	0.000227186	0.0136002	6/146	65/10877	0.0125768	3106/3107/567/3105/3135/2209	6	3
GO:0034340	response to type I interferon	0.000227186	0.0136002	6/146	65/10877	0.0125768	3106/3107/3105/3135/81030/3437	6	3
GO:0008202	steroid metabolic process	0.000246572	0.0144327	11/146	228/10877	0.0133466	31/1718/1717/6319/2194/47/3638/2488/10682/6309/1312	11	3
GO:1902186	regulation of viral release from host cell	0.000268589	0.0153796	4/146	24/10877	0.0142223	7726/6737/9525/128866	4	3
GO:0006911	phagocytosis, engulfment	0.000289869	0.0155819	5/146	44/10877	0.0144094	3494/2209/5879/3537/2213	5	3
GO:0035384	thioester biosynthetic process	0.000289869	0.0155819	5/146	44/10877	0.0144094	31/6319/2194/47/2182	5	3
GO:0071616	acyl-CoA biosynthetic process	0.000289869	0.0155819	5/146	44/10877	0.0144094	31/6319/2194/47/2182	5	3
GO:0050810	regulation of steroid biosynthetic process	0.000315546	0.0164318	6/146	69/10877	0.0151953	31/1717/6319/2194/3638/6309	6	3
GO:0016053	organic acid biosynthetic process	0.000324395	0.0164318	13/146	316/10877	0.0151953	31/6319/2194/3939/47/6774/3101/3638/5208/3037/9415/6916/1907	13	3
GO:0046394	carboxylic acid biosynthetic process	0.000324395	0.0164318	13/146	316/10877	0.0151953	31/6319/2194/3939/47/6774/3101/3638/5208/3037/9415/6916/1907	13	3
GO:1901615	organic hydroxy compound metabolic process	0.000357897	0.0173	14/146	362/10877	0.0159982	31/1718/1717/6319/2194/3939/47/3638/5208/10682/596/6531/6309/1312	14	3
GO:0097286	iron ion import	0.000361239	0.0173	3/146	11/10877	0.0159982	567/4891/7037	3	3
GO:2000781	positive regulation of double-strand break repair	0.000361239	0.0173	3/146	11/10877	0.0159982	151636/83666/23514	3	3
GO:0090181	regulation of cholesterol metabolic process	0.000437788	0.0205917	5/146	48/10877	0.0190421	31/1717/6319/2194/6309	5	3
GO:0009108	coenzyme biosynthetic process	0.000486785	0.0208251	10/146	208/10877	0.0192579	31/6319/2194/3939/47/6774/83666/3101/5208/2182	10	3
GO:0019076	viral release from host cell	0.000496415	0.0208251	4/146	28/10877	0.0192579	7726/6737/9525/128866	4	3
GO:0035890	exit from host	0.000496415	0.0208251	4/146	28/10877	0.0192579	7726/6737/9525/128866	4	3
GO:0035891	exit from host cell	0.000496415	0.0208251	4/146	28/10877	0.0192579	7726/6737/9525/128866	4	3
GO:0052126	movement in host environment	0.000496415	0.0208251	4/146	28/10877	0.0192579	7726/6737/9525/128866	4	3
GO:0052192	movement in environment of other organism involved in symbiotic interaction	0.000496415	0.0208251	4/146	28/10877	0.0192579	7726/6737/9525/128866	4	3
GO:0002274	myeloid leukocyte activation	0.000498093	0.0208251	16/146	465/10877	0.0192579	567/47/3101/1992/8635/5879/6793/2760/1907/51719/2213/10890/90865/2215/1915/10077	16	3
GO:0099024	plasma membrane invagination	0.000530188	0.0218206	5/146	50/10877	0.0201785	3494/2209/5879/3537/2213	5	3
GO:1902930	regulation of alcohol biosynthetic process	0.000581536	0.0233221	5/146	51/10877	0.0215671	31/1717/6319/2194/6309	5	3
GO:0001894	tissue homeostasis	0.00058438	0.0233221	8/146	140/10877	0.0215671	31/567/3494/7037/5879/2488/596/128866	8	3
GO:0006636	unsaturated fatty acid biosynthetic process	0.000739426	0.0290694	4/146	31/10877	0.0268819	6319/9415/6916/1907	4	3
GO:1901568	fatty acid derivative metabolic process	0.000802138	0.031071	7/146	113/10877	0.0287329	31/6319/2194/47/6916/1907/2182	7	3
GO:0002478	antigen processing and presentation of exogenous peptide antigen	0.000842642	0.0320645	8/146	148/10877	0.0296516	3106/3107/567/3105/3135/10437/2209/2213	8	3
GO:0070613	regulation of protein processing	0.000852132	0.0320645	6/146	83/10877	0.0296516	710/715/3537/713/712/714	6	3
GO:1903317	regulation of protein maturation	0.000965993	0.035837	6/146	85/10877	0.0331402	710/715/3537/713/712/714	6	3
GO:0019884	antigen processing and presentation of exogenous antigen	0.00104595	0.0376774	8/146	153/10877	0.0348422	3106/3107/567/3105/3135/10437/2209/2213	8	3
GO:0010324	membrane invagination	0.00105227	0.0376774	5/146	58/10877	0.0348422	3494/2209/5879/3537/2213	5	3
GO:0007159	leukocyte cell-cell adhesion	0.00105852	0.0376774	10/146	230/10877	0.0348422	6347/3135/6401/7037/3037/5879/6793/942/2213/3383	10	3
GO:0048002	antigen processing and presentation of peptide antigen	0.00109096	0.0383146	8/146	154/10877	0.0354314	3106/3107/567/3105/3135/10437/2209/2213	8	3
GO:0002685	regulation of leukocyte migration	0.00114317	0.0396199	7/146	120/10877	0.0366385	6347/5879/6793/1907/57402/90865/3383	7	3
GO:0006898	receptor-mediated endocytosis	0.00119906	0.0410172	9/146	194/10877	0.0379307	567/3494/6401/7037/2209/5879/3537/58191/2213	9	3
GO:0019218	regulation of steroid metabolic process	0.00130198	0.0435592	6/146	90/10877	0.0402813	31/1717/6319/2194/3638/6309	6	3
GO:0002433	immune response-regulating cell surface receptor signaling pathway involved in phagocytosis	0.00132298	0.0435592	5/146	61/10877	0.0402813	63916/2209/5879/3537/2213	5	3
GO:0038096	Fc-gamma receptor signaling pathway involved in phagocytosis	0.00132298	0.0435592	5/146	61/10877	0.0402813	63916/2209/5879/3537/2213	5	3
GO:0050900	leukocyte migration	0.00140674	0.0457452	11/146	281/10877	0.0423028	6347/3494/6401/5879/3537/6793/1907/58191/57402/90865/3383	11	3
GO:0051051	negative regulation of transport	0.00149164	0.0479145	12/146	327/10877	0.0443089	3638/11142/5879/6717/10961/9525/596/51719/2213/90865/1312/3383	12	3
GO:0002431	Fc receptor mediated stimulatory signaling pathway	0.00152997	0.0479754	5/146	63/10877	0.0443652	63916/2209/5879/3537/2213	5	3
GO:0038094	Fc-gamma receptor signaling pathway	0.00152997	0.0479754	5/146	63/10877	0.0443652	63916/2209/5879/3537/2213	5	3
Gene set 46	GSE15256_ANTIBIOTIC-TREATED_ISOLATOR-HOUSED_VS_OUTDOOR-HOUSED_WEANING-AGE_JEJUNUM_DN								1
ID	Description	pvalue	p.adjust	GeneRatio	BgRatio	qvalue	geneID	Count	2
Gene set 47	GSE15256_ANTIBIOTIC-TREATED_ISOLATOR-HOUSED_VS_OUTDOOR-HOUSED_NEAR-MATURE_JEJUNUM_UP								4
ID	Description	pvalue	p.adjust	GeneRatio	BgRatio	qvalue	geneID	Count	5
Gene set 48	GSE15256_ANTIBIOTIC-TREATED_ISOLATOR-HOUSED_VS_OUTDOOR-HOUSED_NEAR-MATURE_JEJUNUM_DN								4
ID	Description	pvalue	p.adjust	GeneRatio	BgRatio	qvalue	geneID	Count	5
GO:0006403	RNA localization	1.39895e-07	0.000365407	16/186	189/10877	0.000347235	55110/6428/55781/23039/57122/6741/3192/10772/84946/7048/53981/1660/9631/9939/6950/1984	16	6
GO:0050657	nucleic acid transport	4.62739e-07	0.000380994	14/186	157/10877	0.000362047	55110/6428/55781/23039/57122/6741/10772/84946/7048/53981/1660/9631/9939/1984	14	6
GO:0050658	RNA transport	4.62739e-07	0.000380994	14/186	157/10877	0.000362047	55110/6428/55781/23039/57122/6741/10772/84946/7048/53981/1660/9631/9939/1984	14	6
GO:0051236	establishment of RNA localization	5.83452e-07	0.000380994	14/186	160/10877	0.000362047	55110/6428/55781/23039/57122/6741/10772/84946/7048/53981/1660/9631/9939/1984	14	6
GO:0006405	RNA export from nucleus	9.24987e-07	0.000483213	12/186	120/10877	0.000459183	55110/6428/55781/57122/6741/10772/84946/53981/1660/9631/9939/1984	12	6
GO:0071426	ribonucleoprotein complex export from nucleus	2.91332e-06	0.00118774	11/186	111/10877	0.00112868	55110/6428/55781/57122/6741/10772/84946/53981/9631/9939/1984	11	6
GO:0071166	ribonucleoprotein complex localization	3.18308e-06	0.00118774	11/186	112/10877	0.00112868	55110/6428/55781/57122/6741/10772/84946/53981/9631/9939/1984	11	6
GO:0015931	nucleobase-containing compound transport	3.77537e-06	0.00123266	14/186	187/10877	0.00117136	55110/6428/55781/23039/57122/6741/10772/84946/7048/53981/1660/9631/9939/1984	14	6
GO:0051168	nuclear export	4.52426e-06	0.00131304	13/186	164/10877	0.00124774	55110/6428/55781/23039/57122/6741/10772/84946/53981/1660/9631/9939/1984	13	6
GO:0006913	nucleocytoplasmic transport	5.96906e-06	0.00155912	17/186	280/10877	0.00148158	55110/6428/81611/10628/55781/23039/57122/6741/10772/29969/84946/53981/1660/9631/9939/6774/1984	17	6
GO:0051169	nuclear transport	6.87825e-06	0.00163327	17/186	283/10877	0.00155205	55110/6428/81611/10628/55781/23039/57122/6741/10772/29969/84946/53981/1660/9631/9939/6774/1984	17	6
GO:0006611	protein export from nucleus	1.03669e-05	0.00225652	12/186	151/10877	0.0021443	55110/6428/55781/23039/57122/6741/10772/84946/53981/9631/9939/1984	12	6
GO:0022613	ribonucleoprotein complex biogenesis	1.62316e-05	0.0032613	20/186	400/10877	0.00309911	6732/27161/57050/51018/6156/55003/29889/8562/55781/8661/10772/57472/84946/84864/6168/1660/9169/80135/84916/6176	20	6
GO:0006338	chromatin remodeling	3.30916e-05	0.00617395	11/186	143/10877	0.00586692	10042/81611/7150/6827/5931/11177/86/84864/3148/64946/3183	11	6
GO:0051028	mRNA transport	3.82879e-05	0.0066672	10/186	120/10877	0.00633564	55110/6428/23039/57122/10772/53981/1660/9631/9939/1984	10	6
GO:0034655	nucleobase-containing compound catabolic process	4.32436e-05	0.00705952	22/186	500/10877	0.00670845	27161/55110/6156/2107/317/57122/6741/3192/57472/164668/3148/328/6168/1660/55149/5511/9631/9939/3183/79072/6774/6176	22	6
GO:0019081	viral translation	5.24654e-05	0.00806116	4/186	13/10877	0.00766028	8562/8661/6741/1660	4	6
GO:0031123	RNA 3-end processing	7.54516e-05	0.0109489	9/186	105/10877	0.0104044	55110/6428/57508/23283/6741/56254/53981/55149/9939	9	6
GO:0006401	RNA catabolic process	0.000122987	0.016776	16/186	321/10877	0.0159418	27161/55110/6156/2107/6741/3192/57472/328/6168/1660/55149/5511/9939/3183/79072/6176	16	6
GO:0019080	viral gene expression	0.000128454	0.016776	11/186	166/10877	0.0159418	6156/6827/8562/57122/8661/6741/29969/6168/1660/9631/6176	11	6
GO:0031503	protein-containing complex localization	0.000141735	0.0176292	12/186	197/10877	0.0167525	55110/6428/55781/57122/6741/10772/84946/53981/83903/9631/9939/1984	12	6
GO:0040029	regulation of gene expression, epigenetic	0.000165723	0.0193722	13/186	231/10877	0.0184088	27161/5931/9533/57122/3192/57472/8330/1660/9631/23512/3021/6774/8332	13	6
GO:0006402	mRNA catabolic process	0.000180736	0.0193722	15/186	298/10877	0.0184088	27161/55110/6156/2107/6741/3192/57472/328/6168/1660/55149/9939/3183/79072/6176	15	6
GO:0006406	mRNA export from nucleus	0.000185415	0.0193722	8/186	93/10877	0.0184088	55110/6428/57122/10772/53981/9631/9939/1984	8	6
GO:0071427	mRNA-containing ribonucleoprotein complex export from nucleus	0.000185415	0.0193722	8/186	93/10877	0.0184088	55110/6428/57122/10772/53981/9631/9939/1984	8	6
GO:0006397	mRNA processing	0.000196606	0.0197514	18/186	405/10877	0.0187692	6732/55110/6428/6827/23283/3192/10772/4154/56254/53981/1660/9169/56259/55149/5511/8899/9939/3183	18	6
GO:0050684	regulation of mRNA processing	0.000248287	0.0240194	8/186	97/10877	0.0228249	6732/6428/3192/10772/4154/56254/1660/9939	8	6
GO:0000377	RNA splicing, via transesterification reactions with bulged adenosine as nucleophile	0.000295979	0.0258684	14/186	278/10877	0.0245819	6732/55110/6428/23283/3192/10772/4154/53981/1660/9169/56259/8899/9939/3183	14	6
GO:0000398	mRNA splicing, via spliceosome	0.000295979	0.0258684	14/186	278/10877	0.0245819	6732/55110/6428/23283/3192/10772/4154/53981/1660/9169/56259/8899/9939/3183	14	6
GO:0051053	negative regulation of DNA metabolic process	0.000306095	0.0258684	8/186	100/10877	0.0245819	29980/9320/3192/79991/54962/3183/8243/4436	8	6
GO:0000375	RNA splicing, via transesterification reactions	0.000307013	0.0258684	14/186	279/10877	0.0245819	6732/55110/6428/23283/3192/10772/4154/53981/1660/9169/56259/8899/9939/3183	14	6
GO:0031124	mRNA 3-end processing	0.000392047	0.0320008	7/186	79/10877	0.0304094	55110/6428/23283/56254/53981/55149/9939	7	6
GO:0032728	positive regulation of interferon-beta production	0.000475809	0.037661	4/186	22/10877	0.0357881	661/3148/7097/1660	4	6
GO:0034470	ncRNA processing	0.000553881	0.0425511	15/186	331/10877	0.040435	27161/57050/9692/57508/51018/339175/6156/112858/55781/6741/84946/6168/80135/84916/6176	15	6
Gene set 49	GSE15472_INDUCED_PLURIPOTENT_STEM_CELLS_VS_FETAL_FIBROBLAST_CELLS_UP								1
ID	Description	pvalue	p.adjust	GeneRatio	BgRatio	qvalue	geneID	Count	2
GO:0019080	viral gene expression	2.68431e-09	6.62219e-06	17/184	166/10877	5.96764e-06	6207/6208/1660/7175/28985/7936/7469/6176/6161/5436/6233/6154/5441/6164/6229/6159/8661	17	3
GO:0006119	oxidative phosphorylation	3.08194e-08	3.57386e-05	13/184	108/10877	3.22062e-05	509/521/9377/4726/1349/201626/1329/4709/4697/54539/539/4714/4711	13	3
GO:0019083	viral transcription	4.346e-08	3.57386e-05	15/184	153/10877	3.22062e-05	6207/6208/1660/7175/7936/7469/6176/6161/5436/6233/6154/5441/6164/6229/6159	15	3
GO:0009205	purine ribonucleoside triphosphate metabolic process	2.67512e-07	0.0001317	18/184	253/10877	0.000118683	509/521/3312/7175/9377/4726/1349/2987/201626/1329/4709/10201/4697/54539/10059/539/4714/4711	18	3
GO:0046034	ATP metabolic process	3.40623e-07	0.0001317	17/184	230/10877	0.000118683	509/521/3312/7175/9377/4726/1349/2987/201626/1329/4709/4697/54539/10059/539/4714/4711	17	3
GO:0009144	purine nucleoside triphosphate metabolic process	3.78955e-07	0.0001317	18/184	259/10877	0.000118683	509/521/3312/7175/9377/4726/1349/2987/201626/1329/4709/10201/4697/54539/10059/539/4714/4711	18	3
GO:0009199	ribonucleoside triphosphate metabolic process	3.78955e-07	0.0001317	18/184	259/10877	0.000118683	509/521/3312/7175/9377/4726/1349/2987/201626/1329/4709/10201/4697/54539/10059/539/4714/4711	18	3
GO:0010948	negative regulation of cell cycle process	4.49273e-07	0.0001317	18/184	262/10877	0.000118683	5884/5714/7175/7756/8409/5721/51065/5683/7013/6233/6154/5933/55795/10201/8738/7157/899/23468	18	3
GO:0006401	RNA catabolic process	4.80462e-07	0.0001317	20/184	321/10877	0.000118683	55629/6207/3312/1153/6208/5714/1660/5721/6176/6161/5436/5683/6233/10535/6154/201626/55795/6164/6229/6159	20	3
GO:1903311	regulation of mRNA metabolic process	5.52819e-07	0.00013638	17/184	238/10877	0.0001229	3312/1153/5714/1660/10291/5721/7936/23210/6428/5436/5683/3190/6233/201626/55795/8683/11051	17	3
GO:0006402	mRNA catabolic process	6.67013e-07	0.000149593	19/184	298/10877	0.000134807	55629/6207/3312/1153/6208/5714/1660/5721/6176/6161/5436/5683/6233/6154/201626/55795/6164/6229/6159	19	3
GO:0009141	nucleoside triphosphate metabolic process	9.62428e-07	0.000197859	18/184	276/10877	0.000178302	509/521/3312/7175/9377/4726/1349/2987/201626/1329/4709/10201/4697/54539/10059/539/4714/4711	18	3
GO:0006413	translational initiation	1.23029e-06	0.00023347	14/184	172/10877	0.000210394	6207/6208/7175/28985/6176/6161/5436/57409/6233/6154/6164/6229/6159/8661	14	3
GO:0009126	purine nucleoside monophosphate metabolic process	2.21154e-06	0.000363725	17/184	263/10877	0.000327774	509/521/3312/7175/9377/4726/1349/2987/201626/1329/4709/4697/54539/10059/539/4714/4711	17	3
GO:0009167	purine ribonucleoside monophosphate metabolic process	2.21154e-06	0.000363725	17/184	263/10877	0.000327774	509/521/3312/7175/9377/4726/1349/2987/201626/1329/4709/4697/54539/10059/539/4714/4711	17	3
GO:0022904	respiratory electron transport chain	2.95091e-06	0.000454994	10/184	91/10877	0.000410022	9377/4726/1349/1329/4709/11232/4697/54539/4714/4711	10	3
GO:0009161	ribonucleoside monophosphate metabolic process	3.85641e-06	0.000534241	17/184	274/10877	0.000481435	509/521/3312/7175/9377/4726/1349/2987/201626/1329/4709/4697/54539/10059/539/4714/4711	17	3
GO:0022613	ribonucleoprotein complex biogenesis	3.89799e-06	0.000534241	21/184	400/10877	0.000481435	285855/6207/1153/6208/55651/1660/10291/28985/26284/51065/6176/6161/54680/6233/11103/6154/8683/6164/6229/6159/8661	21	3
GO:0042775	mitochondrial ATP synthesis coupled electron transport	5.01056e-06	0.000650582	9/184	76/10877	0.000586277	9377/4726/1349/1329/4709/4697/54539/4714/4711	9	3
GO:0042773	ATP synthesis coupled electron transport	5.59193e-06	0.000689765	9/184	77/10877	0.000621587	9377/4726/1349/1329/4709/4697/54539/4714/4711	9	3
GO:0009123	nucleoside monophosphate metabolic process	6.23309e-06	0.00073224	17/184	284/10877	0.000659864	509/521/3312/7175/9377/4726/1349/2987/201626/1329/4709/4697/54539/10059/539/4714/4711	17	3
GO:1901991	negative regulation of mitotic cell cycle phase transition	9.27469e-06	0.00104003	13/184	177/10877	0.000937232	5884/5714/7175/7756/5721/51065/5683/6233/6154/5933/55795/8738/7157	13	3
GO:0034660	ncRNA metabolic process	1.15752e-05	0.00121235	22/184	464/10877	0.00109252	285855/6207/6208/55651/51637/285367/6176/6161/5436/6908/2958/6233/11103/6154/23438/3028/3035/5441/11232/6164/6229/6159	22	3
GO:0034655	nucleobase-containing compound catabolic process	1.17943e-05	0.00121235	23/184	500/10877	0.00109252	55629/6207/3312/1153/6208/5714/1660/7175/83594/5721/6176/6161/5436/5683/51816/6233/10535/6154/201626/55795/6164/6229/6159	23	3
GO:0072594	establishment of protein localization to organelle	1.23169e-05	0.00121543	21/184	431/10877	0.00109529	10075/6207/3312/6208/5714/7175/6176/6161/26520/7531/10400/7013/8655/6233/6154/3084/7157/6164/6229/6159/4714	21	3
GO:0006614	SRP-dependent cotranslational protein targeting to membrane	1.39881e-05	0.00128824	9/184	86/10877	0.00116091	6207/6208/6176/6161/6233/6154/6164/6229/6159	9	3
GO:0000956	nuclear-transcribed mRNA catabolic process	1.40991e-05	0.00128824	13/184	184/10877	0.00116091	55629/6207/6208/6176/6161/5436/6233/6154/201626/55795/6164/6229/6159	13	3
GO:0000184	nuclear-transcribed mRNA catabolic process, nonsense-mediated decay	1.50535e-05	0.00132632	10/184	109/10877	0.00119522	55629/6207/6208/6176/6161/6233/6154/6164/6229/6159	10	3
GO:1901988	negative regulation of cell cycle phase transition	1.98662e-05	0.00169	13/184	190/10877	0.00152296	5884/5714/7175/7756/5721/51065/5683/6233/6154/5933/55795/8738/7157	13	3
GO:0006368	transcription elongation from RNA polymerase II promoter	2.21732e-05	0.00176456	9/184	91/10877	0.00159015	7936/7469/5436/6908/165918/2958/55795/5441/85403	9	3
GO:0006613	cotranslational protein targeting to membrane	2.21732e-05	0.00176456	9/184	91/10877	0.00159015	6207/6208/6176/6161/6233/6154/6164/6229/6159	9	3
GO:1901990	regulation of mitotic cell cycle phase transition	2.51113e-05	0.00187888	17/184	316/10877	0.00169317	5884/5714/7175/7756/5721/51065/7531/5683/8655/6233/6154/5933/55795/8738/7157/11190/7283	17	3
GO:0007005	mitochondrion organization	2.5133e-05	0.00187888	21/184	452/10877	0.00169317	509/521/10075/5714/4726/65991/26520/7531/10400/8655/4709/3028/11232/3084/7157/54539/10059/6341/539/4714/4711	21	3
GO:0045047	protein targeting to ER	3.41153e-05	0.00247536	9/184	96/10877	0.0022307	6207/6208/6176/6161/6233/6154/6164/6229/6159	9	3
GO:0050684	regulation of mRNA processing	3.70633e-05	0.00261243	9/184	97/10877	0.00235422	3312/1660/10291/7936/23210/6428/3190/8683/11051	9	3
GO:0072599	establishment of protein localization to endoplasmic reticulum	4.72339e-05	0.00323683	9/184	100/10877	0.0029169	6207/6208/6176/6161/6233/6154/6164/6229/6159	9	3
GO:0045930	negative regulation of mitotic cell cycle	5.35839e-05	0.00350052	14/184	239/10877	0.00315453	5884/5714/7175/7756/5721/51065/5683/6233/6154/5933/55795/10201/8738/7157	14	3
GO:0002181	cytoplasmic translation	5.39197e-05	0.00350052	8/184	79/10877	0.00315453	285855/1660/28985/6176/6161/6154/6159/8661	8	3
GO:0006605	protein targeting	5.65464e-05	0.00357692	17/184	337/10877	0.00322337	10075/6207/3312/6208/5714/6176/6161/26520/7531/10400/6233/6154/3084/6164/6229/6159/4714	17	3
GO:0006120	mitochondrial electron transport, NADH to ubiquinone	5.93665e-05	0.00359281	6/184	41/10877	0.00323769	4726/4709/4697/54539/4714/4711	6	3
GO:1901987	regulation of cell cycle phase transition	6.08618e-05	0.00359281	17/184	339/10877	0.00323769	5884/5714/7175/7756/5721/51065/7531/5683/8655/6233/6154/5933/55795/8738/7157/11190/7283	17	3
GO:0072521	purine-containing compound metabolic process	6.11667e-05	0.00359281	20/184	444/10877	0.00323769	509/521/3312/7175/9377/4726/1349/10400/51816/2987/201626/1329/4709/10201/4697/54539/10059/539/4714/4711	20	3
GO:0000377	RNA splicing, via transesterification reactions with bulged adenosine as nucleophile	7.3988e-05	0.00414837	15/184	278/10877	0.00373834	3312/1660/10291/56259/23210/6428/5436/3190/10283/51634/5441/220988/51692/8683/11051	15	3
GO:0000398	mRNA splicing, via spliceosome	7.3988e-05	0.00414837	15/184	278/10877	0.00373834	3312/1660/10291/56259/23210/6428/5436/3190/10283/51634/5441/220988/51692/8683/11051	15	3
GO:0000375	RNA splicing, via transesterification reactions	7.70479e-05	0.00422394	15/184	279/10877	0.00380644	3312/1660/10291/56259/23210/6428/5436/3190/10283/51634/5441/220988/51692/8683/11051	15	3
GO:0042254	ribosome biogenesis	8.02181e-05	0.00430213	15/184	280/10877	0.0038769	285855/6207/6208/55651/26284/51065/6176/6161/54680/6233/11103/6154/6164/6229/6159	15	3
GO:0006839	mitochondrial transport	9.4801e-05	0.00497604	14/184	252/10877	0.0044842	509/521/10075/5714/26520/8402/7531/10400/8655/1329/3084/7157/539/4714	14	3
GO:0006354	DNA-templated transcription, elongation	9.97555e-05	0.00512702	9/184	110/10877	0.00462026	7936/7469/5436/6908/165918/2958/55795/5441/85403	9	3
GO:0008380	RNA splicing	0.000118784	0.00598044	17/184	358/10877	0.00538932	6207/3312/1660/10291/56259/51637/23210/6428/5436/3190/10283/51634/5441/220988/51692/8683/11051	17	3
GO:0022900	electron transport chain	0.000136791	0.00674926	10/184	141/10877	0.00608215	9377/4726/1349/1329/4709/11232/4697/54539/4714/4711	10	3
GO:0006397	mRNA processing	0.000171607	0.00814143	18/184	405/10877	0.00733672	3312/1660/10291/56259/7936/23210/6428/285367/5436/3190/10283/51634/201626/5441/220988/51692/8683/11051	18	3
GO:0009150	purine ribonucleotide metabolic process	0.000171607	0.00814143	18/184	405/10877	0.00733672	509/521/3312/7175/9377/4726/1349/2987/201626/1329/4709/10201/4697/54539/10059/539/4714/4711	18	3
GO:0045333	cellular respiration	0.000182298	0.00847362	10/184	146/10877	0.00763607	9377/4726/1349/1329/4709/11232/4697/54539/4714/4711	10	3
GO:0006353	DNA-templated transcription, termination	0.000185479	0.00847362	8/184	94/10877	0.00763607	7270/1660/6428/6908/5441/51692/8683/11051	8	3
GO:0006123	mitochondrial electron transport, cytochrome c to oxygen	0.000201438	0.00887406	4/184	18/10877	0.00799694	9377/1349/1329/4697	4	3
GO:0019646	aerobic electron transport chain	0.000201438	0.00887406	4/184	18/10877	0.00799694	9377/1349/1329/4697	4	3
GO:0061013	regulation of mRNA catabolic process	0.000215274	0.00931719	10/184	149/10877	0.00839627	3312/1153/5714/1660/5721/5436/5683/6233/201626/55795	10	3
GO:0070585	protein localization to mitochondrion	0.000227322	0.00966902	10/184	150/10877	0.00871332	10075/5714/26520/7531/10400/8655/3084/7157/10059/4714	10	3
GO:0042771	intrinsic apoptotic signaling pathway in response to DNA damage by p53 class mediator	0.000245134	0.0101834	5/184	34/10877	0.00917687	51065/3190/6154/83596/7157	5	3
GO:0070972	protein localization to endoplasmic reticulum	0.000248973	0.0101834	9/184	124/10877	0.00917687	6207/6208/6176/6161/6233/6154/6164/6229/6159	9	3
GO:0042776	mitochondrial ATP synthesis coupled proton transport	0.000251799	0.0101834	4/184	19/10877	0.00917687	509/521/1329/539	4	3
GO:0006163	purine nucleotide metabolic process	0.00026067	0.0102075	18/184	419/10877	0.00919859	509/521/3312/7175/9377/4726/1349/2987/201626/1329/4709/10201/4697/54539/10059/539/4714/4711	18	3
GO:0009259	ribonucleotide metabolic process	0.00026067	0.0102075	18/184	419/10877	0.00919859	509/521/3312/7175/9377/4726/1349/2987/201626/1329/4709/10201/4697/54539/10059/539/4714/4711	18	3
GO:0007093	mitotic cell cycle checkpoint	0.000280699	0.0108201	9/184	126/10877	0.0097506	5884/7175/7756/51065/6233/6154/55795/8738/7157	9	3
GO:0090150	establishment of protein localization to membrane	0.000298826	0.0113416	13/184	248/10877	0.0102206	6207/6208/6176/6161/26520/7531/8655/6233/6154/7157/6164/6229/6159	13	3
GO:0006091	generation of precursor metabolites and energy	0.000358319	0.0133076	17/184	393/10877	0.0119922	509/521/7175/9377/4726/1349/6233/201626/1329/4709/11232/4697/54539/6341/539/4714/4711	17	3
GO:0006403	RNA localization	0.000362509	0.0133076	11/184	189/10877	0.0119922	55651/1660/7175/51637/6428/7013/54680/51634/55795/51692/8683	11	3
GO:0019693	ribose phosphate metabolic process	0.000366808	0.0133076	18/184	431/10877	0.0119922	509/521/3312/7175/9377/4726/1349/2987/201626/1329/4709/10201/4697/54539/10059/539/4714/4711	18	3
GO:0006364	rRNA processing	0.000386988	0.013665	12/184	222/10877	0.0123144	285855/6207/6208/55651/6176/6161/6233/11103/6154/6164/6229/6159	12	3
GO:0044772	mitotic cell cycle phase transition	0.000387739	0.013665	18/184	433/10877	0.0123144	5884/9088/5714/7175/7756/5721/51065/7531/5683/8655/6233/6154/5933/55795/8738/7157/11190/7283	18	3
GO:0050434	positive regulation of viral transcription	0.00041866	0.0143663	5/184	38/10877	0.0129463	1660/7936/7469/5436/5441	5	3
GO:0043488	regulation of mRNA stability	0.000419284	0.0143663	9/184	133/10877	0.0129463	3312/1153/5714/1660/5721/5683/6233/201626/55795	9	3
GO:0072332	intrinsic apoptotic signaling pathway by p53 class mediator	0.000462485	0.0156295	6/184	59/10877	0.0140846	51065/3190/64065/6154/83596/7157	6	3
GO:0034470	ncRNA processing	0.000494239	0.0164769	15/184	331/10877	0.0148483	285855/6207/6208/55651/51637/285367/6176/6161/6233/11103/6154/3028/6164/6229/6159	15	3
GO:0045786	negative regulation of cell cycle	0.000528521	0.0172569	19/184	483/10877	0.0155512	5884/5714/7175/7756/8409/5721/51065/5683/274/7013/6233/6154/5933/55795/10201/8738/7157/899/23468	19	3
GO:1903749	positive regulation of establishment of protein localization to mitochondrion	0.000534592	0.0172569	7/184	84/10877	0.0155512	10075/5714/7531/10400/8655/3084/7157	7	3
GO:0015985	energy coupled proton transport, down electrochemical gradient	0.000545619	0.0172569	4/184	23/10877	0.0155512	509/521/1329/539	4	3
GO:0015986	ATP synthesis coupled proton transport	0.000545619	0.0172569	4/184	23/10877	0.0155512	509/521/1329/539	4	3
GO:0043487	regulation of RNA stability	0.000579	0.0180809	9/184	139/10877	0.0162938	3312/1153/5714/1660/5721/5683/6233/201626/55795	9	3
GO:0070897	DNA-templated transcriptional preinitiation complex assembly	0.000599971	0.0185016	5/184	41/10877	0.0166729	55814/6908/2958/11176/7157	5	3
GO:1902749	regulation of cell cycle G2/M phase transition	0.000772435	0.0235259	10/184	175/10877	0.0212006	5884/5714/5721/7531/5683/8655/6233/7157/11190/7283	10	3
GO:0044770	cell cycle phase transition	0.000789847	0.0237628	18/184	460/10877	0.0214141	5884/9088/5714/7175/7756/5721/51065/7531/5683/8655/6233/6154/5933/55795/8738/7157/11190/7283	18	3
GO:0048024	regulation of mRNA splicing, via spliceosome	0.000845894	0.0251424	6/184	66/10877	0.0226573	3312/10291/23210/6428/3190/8683	6	3
GO:0072655	establishment of protein localization to mitochondrion	0.000866356	0.025444	9/184	147/10877	0.0229291	10075/5714/26520/7531/10400/8655/3084/7157/4714	9	3
GO:1902165	regulation of intrinsic apoptotic signaling pathway in response to DNA damage by p53 class mediator	0.000936281	0.0271742	3/184	12/10877	0.0244882	3190/6154/83596	3	3
GO:0044839	cell cycle G2/M phase transition	0.000984595	0.0282441	11/184	213/10877	0.0254524	5884/9088/5714/5721/7531/5683/8655/6233/7157/11190/7283	11	3
GO:0022618	ribonucleoprotein complex assembly	0.00100077	0.0283782	10/184	181/10877	0.0255733	1153/6208/1660/10291/28985/26284/51065/54680/8683/8661	10	3
GO:1903747	regulation of establishment of protein localization to mitochondrion	0.00104879	0.0292926	7/184	94/10877	0.0263973	10075/5714/7531/10400/8655/3084/7157	7	3
GO:0015980	energy derivation by oxidation of organic compounds	0.00106252	0.0292926	11/184	215/10877	0.0263973	9377/4726/1349/6233/1329/4709/11232/4697/54539/4714/4711	11	3
GO:0016072	rRNA metabolic process	0.00106864	0.0292926	12/184	249/10877	0.0263973	285855/6207/6208/55651/6176/6161/6233/11103/6154/6164/6229/6159	12	3
GO:0006612	protein targeting to membrane	0.00109849	0.0297799	9/184	152/10877	0.0268364	6207/6208/6176/6161/6233/6154/6164/6229/6159	9	3
GO:0019081	viral translation	0.00120208	0.032234	3/184	13/10877	0.0290479	1660/28985/8661	3	3
GO:0048524	positive regulation of viral process	0.00126165	0.0334677	7/184	97/10877	0.0301597	3312/1660/7936/7469/5436/201626/5441	7	3
GO:0032388	positive regulation of intracellular transport	0.00128176	0.0336394	10/184	187/10877	0.0303144	10075/5714/1660/7175/7531/10400/54828/3084/7157/10059	10	3
GO:0010822	positive regulation of mitochondrion organization	0.00132385	0.0343783	8/184	126/10877	0.0309803	10075/5714/7531/10400/8655/3084/7157/10059	8	3
GO:0072331	signal transduction by p53 class mediator	0.00137648	0.0353728	11/184	222/10877	0.0318765	5884/51065/6908/9100/3190/64065/6233/6154/83596/8738/7157	11	3
GO:0010389	regulation of G2/M transition of mitotic cell cycle	0.00144103	0.0363674	9/184	158/10877	0.0327728	5884/5714/5721/7531/5683/8655/6233/11190/7283	9	3
GO:0071826	ribonucleoprotein complex subunit organization	0.00144467	0.0363674	10/184	190/10877	0.0327728	1153/6208/1660/10291/28985/26284/51065/54680/8683/8661	10	3
GO:0065004	protein-DNA complex assembly	0.00150567	0.0371766	9/184	159/10877	0.033502	7290/144108/55814/6908/2958/7013/6233/11176/7157	9	3
GO:0043484	regulation of RNA splicing	0.00150696	0.0371766	7/184	100/10877	0.033502	6207/3312/10291/23210/6428/3190/8683	7	3
GO:0051236	establishment of RNA localization	0.00157263	0.0384127	9/184	160/10877	0.0346159	1660/7175/51637/6428/7013/51634/55795/51692/8683	9	3
GO:0010257	NADH dehydrogenase complex assembly	0.00179126	0.0429033	5/184	52/10877	0.0386627	4726/4709/54539/4714/4711	5	3
GO:0032981	mitochondrial respiratory chain complex I assembly	0.00179126	0.0429033	5/184	52/10877	0.0386627	4726/4709/54539/4714/4711	5	3
GO:0051168	nuclear export	0.00186481	0.043413	9/184	164/10877	0.039122	1660/7175/6428/7531/51634/55795/51692/7157/8683	9	3
GO:0000028	ribosomal small subunit assembly	0.00186533	0.043413	3/184	15/10877	0.039122	6208/26284/51065	3	3
GO:0006978	DNA damage response, signal transduction by p53 class mediator resulting in transcription of p21 class mediator	0.00186533	0.043413	3/184	15/10877	0.039122	51065/6154/7157	3	3
GO:0000086	G2/M transition of mitotic cell cycle	0.00189096	0.0435014	10/184	197/10877	0.0392016	5884/9088/5714/5721/7531/5683/8655/6233/11190/7283	10	3
GO:0010608	posttranscriptional regulation of gene expression	0.0019044	0.0435014	17/184	457/10877	0.0392016	3312/1153/6208/5714/1660/7175/5721/51065/10247/5436/5683/57409/6233/6154/201626/55795/5441	17	3
GO:0046782	regulation of viral transcription	0.00195116	0.0441606	5/184	53/10877	0.0397957	1660/7936/7469/5436/5441	5	3
GO:0007006	mitochondrial membrane organization	0.00199683	0.0447835	7/184	105/10877	0.0403571	509/521/26520/7531/8655/7157/539	7	3
GO:0071897	DNA biosynthetic process	0.00211125	0.046923	9/184	167/10877	0.0422851	55651/9100/7013/25865/6233/9768/11232/7157/63922	9	3
GO:0033108	mitochondrial respiratory chain complex assembly	0.00215997	0.0475773	6/184	79/10877	0.0428747	4726/4709/54539/6341/4714/4711	6	3
GO:0042772	DNA damage response, signal transduction resulting in transcription	0.0022674	0.0495016	3/184	16/10877	0.0446088	51065/6154/7157	3	3
Gene set 50	GSE15472_INDUCED_PLURIPOTENT_STEM_CELLS_VS_FETAL_FIBROBLAST_CELLS_DN								1
ID	Description	pvalue	p.adjust	GeneRatio	BgRatio	qvalue	geneID	Count	2
Gene set 51	GSE16348_D3_VS_D1_IMMOBILIZED_MUSCLE_UP								4
ID	Description	pvalue	p.adjust	GeneRatio	BgRatio	qvalue	geneID	Count	5
Gene set 52	GSE16348_D3_VS_D1_IMMOBILIZED_MUSCLE_DN								4
ID	Description	pvalue	p.adjust	GeneRatio	BgRatio	qvalue	geneID	Count	5
GO:0045333	cellular respiration	4.24915e-12	1.1086e-08	19/184	146/10877	1.08421e-08	1738/1737/5162/4698/4719/3419/8803/54205/7386/2108/4190/4720/6392/1537/4535/8604/4706/4714/9512	19	6
GO:0015980	energy derivation by oxidation of organic compounds	1.07676e-11	1.40463e-08	22/184	215/10877	1.37371e-08	1738/2632/1737/5162/4698/4719/3419/8803/54205/5167/7386/2108/2997/4190/4720/6392/1537/4535/8604/4706/4714/9512	22	6
GO:0022904	respiratory electron transport chain	3.28103e-10	2.8534e-07	14/184	91/10877	2.7906e-07	1738/4698/4719/54205/7386/2108/4720/6392/1537/4535/8604/4706/4714/9512	14	6
GO:0006091	generation of precursor metabolites and energy	4.56862e-10	2.97989e-07	27/184	393/10877	2.9143e-07	1738/2632/1737/5162/4698/4719/498/3419/8803/5223/5315/54205/518/5167/7386/2108/2997/4190/4720/216/6392/1537/4535/8604/4706/4714/9512	27	6
GO:0006119	oxidative phosphorylation	3.34122e-09	1.74345e-06	14/184	108/10877	1.70508e-06	1738/4698/4719/498/54205/518/7386/4720/6392/1537/4535/4706/4714/9512	14	6
GO:0042775	mitochondrial ATP synthesis coupled electron transport	4.63246e-09	2.01435e-06	12/184	76/10877	1.97002e-06	1738/4698/4719/54205/7386/4720/6392/1537/4535/4706/4714/9512	12	6
GO:0042773	ATP synthesis coupled electron transport	5.40754e-09	2.01547e-06	12/184	77/10877	1.97111e-06	1738/4698/4719/54205/7386/4720/6392/1537/4535/4706/4714/9512	12	6
GO:0046034	ATP metabolic process	6.33355e-08	2.06553e-05	18/184	230/10877	2.02007e-05	1738/4698/4719/498/5223/5315/54205/518/5167/7386/4720/6392/1537/4535/4706/4714/535/9512	18	6
GO:0022900	electron transport chain	1.06266e-07	3.08054e-05	14/184	141/10877	3.01274e-05	1738/4698/4719/54205/7386/2108/4720/6392/1537/4535/8604/4706/4714/9512	14	6
GO:0009205	purine ribonucleoside triphosphate metabolic process	2.67512e-07	6.97939e-05	18/184	253/10877	6.82578e-05	1738/4698/4719/498/5223/5315/54205/518/5167/7386/4720/6392/1537/4535/4706/4714/535/9512	18	6
GO:0006099	tricarboxylic acid cycle	3.10118e-07	7.35545e-05	7/184	28/10877	7.19356e-05	1738/1737/5162/3419/8803/4190/6392	7	6
GO:0009144	purine nucleoside triphosphate metabolic process	3.78955e-07	7.60534e-05	18/184	259/10877	7.43796e-05	1738/4698/4719/498/5223/5315/54205/518/5167/7386/4720/6392/1537/4535/4706/4714/535/9512	18	6
GO:0009199	ribonucleoside triphosphate metabolic process	3.78955e-07	7.60534e-05	18/184	259/10877	7.43796e-05	1738/4698/4719/498/5223/5315/54205/518/5167/7386/4720/6392/1537/4535/4706/4714/535/9512	18	6
GO:0009126	purine nucleoside monophosphate metabolic process	4.75232e-07	8.26587e-05	18/184	263/10877	8.08394e-05	1738/4698/4719/498/5223/5315/54205/518/5167/7386/4720/6392/1537/4535/4706/4714/535/9512	18	6
GO:0009167	purine ribonucleoside monophosphate metabolic process	4.75232e-07	8.26587e-05	18/184	263/10877	8.08394e-05	1738/4698/4719/498/5223/5315/54205/518/5167/7386/4720/6392/1537/4535/4706/4714/535/9512	18	6
GO:0006101	citrate metabolic process	8.32559e-07	0.000132891	7/184	32/10877	0.000129967	1738/1737/5162/3419/8803/4190/6392	7	6
GO:0009161	ribonucleoside monophosphate metabolic process	8.65908e-07	0.000132891	18/184	274/10877	0.000129967	1738/4698/4719/498/5223/5315/54205/518/5167/7386/4720/6392/1537/4535/4706/4714/535/9512	18	6
GO:0009141	nucleoside triphosphate metabolic process	9.62428e-07	0.000139499	18/184	276/10877	0.000136428	1738/4698/4719/498/5223/5315/54205/518/5167/7386/4720/6392/1537/4535/4706/4714/535/9512	18	6
GO:0009123	nucleoside monophosphate metabolic process	1.45424e-06	0.00019969	18/184	284/10877	0.000195295	1738/4698/4719/498/5223/5315/54205/518/5167/7386/4720/6392/1537/4535/4706/4714/535/9512	18	6
GO:0072350	tricarboxylic acid metabolic process	1.59353e-06	0.000207876	7/184	35/10877	0.000203301	1738/1737/5162/3419/8803/4190/6392	7	6
GO:0009060	aerobic respiration	2.49552e-06	0.000310039	9/184	70/10877	0.000303215	1738/1737/5162/3419/8803/54205/4190/6392/9512	9	6
GO:0006120	mitochondrial electron transport, NADH to ubiquinone	4.89013e-06	0.000579925	7/184	41/10877	0.000567161	1738/4698/4719/4720/4535/4706/4714	7	6
GO:0006122	mitochondrial electron transport, ubiquinol to cytochrome c	2.38377e-05	0.00270402	4/184	11/10877	0.00264451	54205/7386/1537/9512	4	6
GO:0010510	regulation of acetyl-CoA biosynthetic process from pyruvate	3.52846e-05	0.0036823	4/184	12/10877	0.00360126	1738/1737/5162/8050	4	6
GO:0050812	regulation of acyl-CoA biosynthetic process	3.52846e-05	0.0036823	4/184	12/10877	0.00360126	1738/1737/5162/8050	4	6
GO:0006637	acyl-CoA metabolic process	5.90557e-05	0.00570653	8/184	80/10877	0.00558093	1738/1737/5162/1622/8803/3157/8050/3295	8	6
GO:0035383	thioester metabolic process	5.90557e-05	0.00570653	8/184	80/10877	0.00558093	1738/1737/5162/1622/8803/3157/8050/3295	8	6
GO:0006086	acetyl-CoA biosynthetic process from pyruvate	6.94836e-05	0.00647439	4/184	14/10877	0.00633189	1738/1737/5162/8050	4	6
GO:0007005	mitochondrion organization	7.83008e-05	0.00704438	20/184	452/10877	0.00688934	4698/66008/4719/498/211/10971/55245/54205/518/10469/4720/3329/4535/133522/841/4706/4714/29928/10989/9512	20	6
GO:0042762	regulation of sulfur metabolic process	0.000123027	0.0106992	4/184	16/10877	0.0104638	1738/1737/5162/8050	4	6
GO:0006084	acetyl-CoA metabolic process	0.00013261	0.0111606	5/184	30/10877	0.010915	1738/1737/5162/3157/8050	5	6
GO:0009150	purine ribonucleotide metabolic process	0.000171607	0.0139913	18/184	405/10877	0.0136834	1738/4698/4719/498/5223/5315/54205/518/5167/7386/4720/6392/1537/4535/4706/4714/535/9512	18	6
GO:0072521	purine-containing compound metabolic process	0.000183883	0.0145379	19/184	444/10877	0.014218	1738/4698/4719/498/10768/5223/5315/54205/518/5167/7386/4720/6392/1537/4535/4706/4714/535/9512	19	6
GO:0010257	NADH dehydrogenase complex assembly	0.00023043	0.0171769	6/184	52/10877	0.0167989	4698/4719/4720/4535/4706/4714	6	6
GO:0032981	mitochondrial respiratory chain complex I assembly	0.00023043	0.0171769	6/184	52/10877	0.0167989	4698/4719/4720/4535/4706/4714	6	6
GO:0006085	acetyl-CoA biosynthetic process	0.000251799	0.0178971	4/184	19/10877	0.0175032	1738/1737/5162/8050	4	6
GO:0006163	purine nucleotide metabolic process	0.00026067	0.0178971	18/184	419/10877	0.0175032	1738/4698/4719/498/5223/5315/54205/518/5167/7386/4720/6392/1537/4535/4706/4714/535/9512	18	6
GO:0009259	ribonucleotide metabolic process	0.00026067	0.0178971	18/184	419/10877	0.0175032	1738/4698/4719/498/5223/5315/54205/518/5167/7386/4720/6392/1537/4535/4706/4714/535/9512	18	6
GO:0019693	ribose phosphate metabolic process	0.000366808	0.0231002	18/184	431/10877	0.0225918	1738/4698/4719/498/5223/5315/54205/518/5167/7386/4720/6392/1537/4535/4706/4714/535/9512	18	6
GO:0033108	mitochondrial respiratory chain complex assembly	0.000367244	0.0231002	7/184	79/10877	0.0225918	4698/4719/55245/4720/4535/4706/4714	7	6
GO:1990542	mitochondrial transmembrane transport	0.000367244	0.0231002	7/184	79/10877	0.0225918	498/518/10469/1537/3329/8604/29928	7	6
GO:0016999	antibiotic metabolic process	0.00037187	0.0231002	8/184	104/10877	0.0225918	1738/1737/5162/3419/8803/4190/216/6392	8	6
GO:0016051	carbohydrate biosynthetic process	0.000421924	0.0256	10/184	162/10877	0.0250366	2632/1407/2589/5223/5167/2997/4190/8604/4706/2805	10	6
GO:0015985	energy coupled proton transport, down electrochemical gradient	0.000545619	0.0316338	4/184	23/10877	0.0309375	498/518/1537/535	4	6
GO:0015986	ATP synthesis coupled proton transport	0.000545619	0.0316338	4/184	23/10877	0.0309375	498/518/1537/535	4	6
GO:0006790	sulfur compound metabolic process	0.000647918	0.0367482	13/184	269/10877	0.0359394	1738/1737/5162/10768/4060/27010/1622/8803/5167/3157/8050/22901/3295	13	6
GO:0071397	cellular response to cholesterol	0.000711032	0.0394698	3/184	11/10877	0.0386012	1605/4040/3157	3	6
Gene set 53	GSE16348_D5_VS_D1_IMMOBILIZED_MUSCLE_UP								1
ID	Description	pvalue	p.adjust	GeneRatio	BgRatio	qvalue	geneID	Count	2
GO:0006613	cotranslational protein targeting to membrane	1.49677e-32	3.52939e-29	31/188	91/10877	3.2283e-29	6233/6158/6202/6231/6152/6125/6218/6187/6194/6201/4736/6210/6193/6203/6157/6144/6128/6746/6159/6189/6138/6146/23521/6135/6228/6204/6217/6223/6134/6224/6230	31	3
GO:0006413	translational initiation	6.78395e-32	5.53427e-29	38/188	172/10877	5.06215e-29	6233/6158/6202/6231/6152/6125/4869/6218/6187/6194/6201/4736/6210/6193/6203/6157/6144/6128/6159/6189/6138/6146/8666/23521/6135/8664/6228/6204/6217/10480/6223/6134/6224/8667/8662/6230/1965/51386	38	3
GO:0006614	SRP-dependent cotranslational protein targeting to membrane	7.04106e-32	5.53427e-29	30/188	86/10877	5.06215e-29	6233/6158/6202/6231/6152/6125/6218/6187/6194/6201/4736/6210/6193/6203/6157/6144/6128/6159/6189/6138/6146/23521/6135/6228/6204/6217/6223/6134/6224/6230	30	3
GO:0045047	protein targeting to ER	3.26413e-30	1.92421e-27	30/188	96/10877	1.76005e-27	6233/6158/6202/6231/6152/6125/6218/6187/6194/6201/4736/6210/6193/6203/6157/6144/6128/6159/6189/6138/6146/23521/6135/6228/6204/6217/6223/6134/6224/6230	30	3
GO:0000184	nuclear-transcribed mRNA catabolic process, nonsense-mediated decay	9.09694e-30	4.29012e-27	31/188	109/10877	3.92413e-27	6233/6158/6202/6231/6152/6125/6218/6187/6194/6201/4736/6210/6193/6203/6157/6144/6128/6159/6189/6138/6146/23521/6135/6228/6204/6217/6223/6134/6224/2107/6230	31	3
GO:0072599	establishment of protein localization to endoplasmic reticulum	1.31851e-29	5.18174e-27	30/188	100/10877	4.7397e-27	6233/6158/6202/6231/6152/6125/6218/6187/6194/6201/4736/6210/6193/6203/6157/6144/6128/6159/6189/6138/6146/23521/6135/6228/6204/6217/6223/6134/6224/6230	30	3
GO:0019080	viral gene expression	1.24862e-28	4.20605e-26	35/188	166/10877	3.84724e-26	6233/6158/6202/6231/6152/6125/6218/6187/6194/6201/4736/6210/6193/6203/6157/6144/6128/6159/6189/6138/6146/6598/8666/23521/6135/8664/6228/6204/6217/6223/6134/6224/8662/6230/51386	35	3
GO:0070972	protein localization to endoplasmic reticulum	7.50598e-28	2.21239e-25	31/188	124/10877	2.02365e-25	6233/6158/6202/6231/6152/6125/6218/6187/6194/6201/4736/6210/6193/6203/6157/6144/6128/6159/6189/6138/6146/23521/6135/6228/6204/6217/6223/6134/6224/11079/6230	31	3
GO:0006612	protein targeting to membrane	3.51209e-26	9.20168e-24	32/188	152/10877	8.4167e-24	6233/6158/6202/6231/6152/6125/6218/6187/6194/6201/4736/6210/6193/6203/6157/6144/6128/6746/6159/6189/6138/6146/11261/23521/6135/6228/6204/6217/6223/6134/6224/6230	32	3
GO:0006402	mRNA catabolic process	7.77285e-26	1.83284e-23	41/188	298/10877	1.67648e-23	6233/6158/6202/6231/6152/6125/4869/5683/6218/5695/6187/6194/1994/6201/4736/6210/5708/6193/6203/23658/6157/6144/6128/6159/6189/6138/6146/5692/5710/23521/6135/10213/6228/6204/6217/6223/6134/6224/2107/5694/6230	41	3
GO:0006401	RNA catabolic process	1.39465e-25	2.98963e-23	42/188	321/10877	2.73459e-23	6233/6158/6202/6231/6152/6125/4869/5683/6218/5695/6187/6194/1994/6201/4736/6210/5708/6193/6203/23658/6157/6144/6128/6159/6189/6138/6146/5692/5710/23521/6135/10213/6228/6204/6217/6223/6134/6224/2107/5694/8882/6230	42	3
GO:0019083	viral transcription	7.75085e-25	1.52304e-22	31/188	153/10877	1.39311e-22	6233/6158/6202/6231/6152/6125/6218/6187/6194/6201/4736/6210/6193/6203/6157/6144/6128/6159/6189/6138/6146/6598/23521/6135/6228/6204/6217/6223/6134/6224/6230	31	3
GO:0042254	ribosome biogenesis	8.97081e-25	1.62717e-22	39/188	280/10877	1.48836e-22	6233/6158/6202/6231/6152/6125/4869/6218/6187/6194/55505/6201/4736/6210/6193/6203/6157/708/6144/6128/6159/54552/6189/8602/6138/6146/25879/23521/6135/6228/6204/6217/6223/6134/6224/51491/6230/55759/51096	39	3
GO:0016072	rRNA metabolic process	1.58563e-24	2.67066e-22	37/188	249/10877	2.44283e-22	6233/6158/6202/6231/6152/6125/6218/6187/6194/2976/55505/6201/4736/6210/6193/6203/6157/6144/6128/6159/6189/8602/6138/6146/6598/25879/23521/6135/6228/6204/6217/6223/6134/6224/6230/55759/51096	37	3
GO:0006364	rRNA processing	4.19416e-24	6.59323e-22	35/188	222/10877	6.03077e-22	6233/6158/6202/6231/6152/6125/6218/6187/6194/55505/6201/4736/6210/6193/6203/6157/6144/6128/6159/6189/8602/6138/6146/25879/23521/6135/6228/6204/6217/6223/6134/6224/6230/55759/51096	35	3
GO:0022613	ribonucleoprotein complex biogenesis	1.15873e-23	1.70768e-21	44/188	400/10877	1.562e-21	6233/6158/6202/6231/6152/6125/4869/6218/6187/6194/55505/6201/4736/6210/6193/6203/6157/708/6144/6128/6159/54552/6189/8602/6138/6146/3326/25879/23521/6135/8664/6228/6204/79577/6217/6223/6134/6224/6635/51491/10419/6230/55759/51096	44	3
GO:0000956	nuclear-transcribed mRNA catabolic process	1.93319e-23	2.68145e-21	32/188	184/10877	2.4527e-21	6233/6158/6202/6231/6152/6125/6218/6187/6194/6201/4736/6210/6193/6203/23658/6157/6144/6128/6159/6189/6138/6146/23521/6135/6228/6204/6217/6223/6134/6224/2107/6230	32	3
GO:0072594	establishment of protein localization to organelle	2.44386e-22	3.20145e-20	44/188	431/10877	2.92834e-20	6233/6158/6202/6231/6152/6125/10574/6218/5695/6187/6194/6201/4736/9146/6210/6193/6203/6157/6144/6128/7332/6159/7323/6189/10575/8766/6138/6146/3326/11261/23521/6135/6228/6204/293/6217/10576/7295/6223/6134/6224/10204/8882/6230	44	3
GO:0034470	ncRNA processing	4.38504e-21	5.44207e-19	38/188	331/10877	4.97781e-19	6233/6158/6202/6231/6152/6125/339175/6218/6187/6194/55505/6201/4736/6210/6193/6203/6157/6144/6128/6159/6189/8602/6138/6146/25879/23521/6135/6228/6204/6217/6223/6134/6224/26512/51493/6230/55759/51096	38	3
GO:0006605	protein targeting	8.3172e-21	9.80598e-19	38/188	337/10877	8.96944e-19	6233/6158/6202/6231/6152/6125/6218/5695/6187/6194/6201/4736/9146/6210/6193/6203/6157/6144/6128/7332/6746/6159/7323/6189/6138/6146/11261/11337/23521/6135/6228/6204/293/6217/6223/6134/6224/6230	38	3
GO:0090150	establishment of protein localization to membrane	2.29996e-20	2.58252e-18	33/188	248/10877	2.36221e-18	6233/6158/6202/6231/6152/6125/6218/6187/6194/6201/4736/6210/6193/6203/6157/6144/6128/6746/6159/6189/8766/6138/6146/11261/23521/6135/6228/6204/6217/6223/6134/6224/6230	33	3
GO:0034660	ncRNA metabolic process	3.5305e-20	3.78405e-18	43/188	464/10877	3.46124e-18	6233/6158/6202/6231/6152/6125/339175/6218/6187/6194/2976/55505/6201/4736/6210/6193/6203/6157/6144/5451/6128/6159/6189/8602/6138/6146/6598/25879/23521/6135/6228/6204/6217/10056/2193/6223/6134/6224/26512/51493/6230/55759/51096	43	3
GO:0034655	nucleobase-containing compound catabolic process	4.12112e-18	4.22504e-16	42/188	500/10877	3.86461e-16	6233/6158/6202/6231/6152/6125/4869/5683/6218/5695/6187/6194/1994/6201/4736/6210/5708/6193/6203/23658/6157/6144/6128/6159/6189/6138/6146/5692/5710/23521/6135/10213/6228/6204/6217/6223/6134/6224/2107/5694/8882/6230	42	3
GO:0072657	protein localization to membrane	2.21811e-16	2.1793e-14	38/188	453/10877	1.99338e-14	6233/6158/6202/6231/6152/6125/6218/6187/6194/6201/10959/4736/9146/6210/391/6193/6203/6157/6144/6128/6746/6159/6189/8766/6138/6146/11261/23521/6135/6228/6204/6217/1173/6223/6134/6224/11079/6230	38	3
GO:0002181	cytoplasmic translation	1.66125e-14	1.56689e-12	17/188	79/10877	1.43322e-12	6231/6152/6201/4736/6157/6128/200916/6159/6189/6138/6146/23521/6135/8664/6228/10480/6224	17	3
GO:0042274	ribosomal small subunit biogenesis	4.1617e-10	3.77434e-08	12/188	61/10877	3.45236e-08	6202/4869/6218/6194/6201/6193/8602/25879/6204/6217/6223/51096	12	3
GO:0042255	ribosome assembly	8.0069e-10	6.99269e-08	11/188	51/10877	6.39615e-08	6152/6125/4869/6218/6193/708/6128/6135/6204/6223/6134	11	3
GO:0022618	ribonucleoprotein complex assembly	2.04071e-09	1.71857e-07	18/188	181/10877	1.57196e-07	6152/6125/4869/6218/6193/708/6128/3326/23521/6135/8664/6228/6204/79577/6223/6134/6635/10419	18	3
GO:0071826	ribonucleoprotein complex subunit organization	4.4556e-09	3.62286e-07	18/188	190/10877	3.3138e-07	6152/6125/4869/6218/6193/708/6128/3326/23521/6135/8664/6228/6204/79577/6223/6134/6635/10419	18	3
GO:0031145	anaphase-promoting complex-dependent catabolic process	5.15877e-07	4.05479e-05	10/188	74/10877	3.70888e-05	6233/27338/5683/5695/5708/5692/5710/246184/10213/5694	10	3
GO:0042273	ribosomal large subunit biogenesis	1.04705e-06	7.96434e-05	9/188	62/10877	7.28491e-05	6152/6125/4869/4736/6128/6135/6134/51491/55759	9	3
GO:1904874	positive regulation of telomerase RNA localization to Cajal body	3.8164e-06	0.000281221	5/188	15/10877	0.00025723	10574/55505/10575/10576/7203	5	3
GO:1903829	positive regulation of cellular protein localization	4.68099e-06	0.000334478	17/188	272/10877	0.000305944	10574/5695/391/2010/7332/54552/7323/10575/8766/10541/3326/11261/10576/7203/11079/10204/8882	17	3
GO:0061418	regulation of transcription from RNA polymerase II promoter in response to hypoxia	5.34344e-06	0.000370346	9/188	75/10877	0.000338752	6233/5683/5695/5708/7323/5692/5710/10213/5694	9	3
GO:0007004	telomere maintenance via telomerase	5.49707e-06	0.000370346	8/188	57/10877	0.000338752	10574/55505/54552/10575/3326/10576/7203/7520	8	3
GO:0006511	ubiquitin-dependent protein catabolic process	5.94222e-06	0.000389215	23/188	469/10877	0.000356012	6233/9354/27338/6125/5683/51255/5695/6201/7329/5708/7332/7317/7323/3326/5692/5710/124997/6135/246184/10213/5694/55968/54472	23	3
GO:0006278	RNA-dependent DNA biosynthetic process	7.16251e-06	0.000456465	8/188	59/10877	0.000417525	10574/55505/54552/10575/3326/10576/7203/7520	8	3
GO:0019941	modification-dependent protein catabolic process	7.58214e-06	0.000465574	23/188	476/10877	0.000425857	6233/9354/27338/6125/5683/51255/5695/6201/7329/5708/7332/7317/7323/3326/5692/5710/124997/6135/246184/10213/5694/55968/54472	23	3
GO:0060071	Wnt signaling pathway, planar cell polarity pathway	7.70034e-06	0.000465574	10/188	99/10877	0.000425857	6233/5683/5695/5708/5692/5710/1175/10213/1173/5694	10	3
GO:0090175	regulation of establishment of planar polarity	8.42917e-06	0.000496899	10/188	100/10877	0.00045451	6233/5683/5695/5708/5692/5710/1175/10213/1173/5694	10	3
GO:0060218	hematopoietic stem cell differentiation	9.16013e-06	0.000526819	9/188	80/10877	0.000481877	6233/5683/5695/5708/5692/5710/10213/5694/7520	9	3
GO:0043632	modification-dependent macromolecule catabolic process	9.95338e-06	0.000558811	23/188	484/10877	0.00051114	6233/9354/27338/6125/5683/51255/5695/6201/7329/5708/7332/7317/7323/3326/5692/5710/124997/6135/246184/10213/5694/55968/54472	23	3
GO:1904872	regulation of telomerase RNA localization to Cajal body	1.04386e-05	0.000559956	5/188	18/10877	0.000512187	10574/55505/10575/10576/7203	5	3
GO:0010833	telomere maintenance via telomere lengthening	1.04487e-05	0.000559956	8/188	62/10877	0.000512187	10574/55505/54552/10575/3326/10576/7203/7520	8	3
GO:1900180	regulation of protein localization to nucleus	1.37033e-05	0.000672213	9/188	84/10877	0.000614867	10574/10575/3326/11261/10576/7295/7203/10204/8882	9	3
GO:0090670	RNA localization to Cajal body	1.39688e-05	0.000672213	5/188	19/10877	0.000614867	10574/55505/10575/10576/7203	5	3
GO:0090671	telomerase RNA localization to Cajal body	1.39688e-05	0.000672213	5/188	19/10877	0.000614867	10574/55505/10575/10576/7203	5	3
GO:0090672	telomerase RNA localization	1.39688e-05	0.000672213	5/188	19/10877	0.000614867	10574/55505/10575/10576/7203	5	3
GO:0090685	RNA localization to nucleus	1.39688e-05	0.000672213	5/188	19/10877	0.000614867	10574/55505/10575/10576/7203	5	3
GO:0070498	interleukin-1-mediated signaling pathway	1.51003e-05	0.00071213	9/188	85/10877	0.000651379	6233/5683/5695/5708/5692/5710/10213/5694/54472	9	3
GO:0001736	establishment of planar polarity	1.81517e-05	0.00081766	10/188	109/10877	0.000747906	6233/5683/5695/5708/5692/5710/1175/10213/1173/5694	10	3
GO:0007164	establishment of tissue polarity	1.81517e-05	0.00081766	10/188	109/10877	0.000747906	6233/5683/5695/5708/5692/5710/1175/10213/1173/5694	10	3
GO:0000462	maturation of SSU-rRNA from tricistronic rRNA transcript (SSU-rRNA, 5.8S rRNA, LSU-rRNA)	1.84881e-05	0.00081766	6/188	33/10877	0.000747906	6202/8602/25879/6217/6223/51096	6	3
GO:0031146	SCF-dependent proteasomal ubiquitin-dependent protein catabolic process	1.8725e-05	0.00081766	8/188	67/10877	0.000747906	6233/5683/5695/5708/5692/5710/10213/5694	8	3
GO:0000723	telomere maintenance	2.12989e-05	0.00091314	10/188	111/10877	0.000835241	10574/55505/54552/10575/3326/10576/7203/7520/57804/5982	10	3
GO:1904816	positive regulation of protein localization to chromosome, telomeric region	2.59433e-05	0.00107323	4/188	11/10877	0.000981678	10574/54552/10575/10576	4	3
GO:1990173	protein localization to nucleoplasm	2.59433e-05	0.00107323	4/188	11/10877	0.000981678	10574/10575/10576/7203	4	3
GO:0032200	telomere organization	2.68942e-05	0.00109339	10/188	114/10877	0.00100011	10574/55505/54552/10575/3326/10576/7203/7520/57804/5982	10	3
GO:0070198	protein localization to chromosome, telomeric region	3.03291e-05	0.00121214	5/188	22/10877	0.00110873	10574/54552/10575/10576/7520	5	3
GO:1902036	regulation of hematopoietic stem cell differentiation	3.19236e-05	0.0012546	8/188	72/10877	0.00114757	6233/5683/5695/5708/5692/5710/10213/5694	8	3
GO:0006521	regulation of cellular amino acid metabolic process	3.6734e-05	0.00139708	7/188	54/10877	0.0012779	5683/5695/5708/5692/5710/10213/5694	7	3
GO:1900182	positive regulation of protein localization to nucleus	3.6734e-05	0.00139708	7/188	54/10877	0.0012779	10574/10575/3326/10576/7203/10204/8882	7	3
GO:0001738	morphogenesis of a polarized epithelium	3.90238e-05	0.0014606	10/188	119/10877	0.001336	6233/5683/5695/5708/5692/5710/1175/10213/1173/5694	10	3
GO:0010608	posttranscriptional regulation of gene expression	4.0812e-05	0.00150367	21/188	457/10877	0.00137539	6233/6125/4869/5683/5695/1994/5708/6203/708/5692/5710/23521/10213/8664/84271/6134/2107/5694/8667/8662/1965	21	3
GO:2000573	positive regulation of DNA biosynthetic process	4.67237e-05	0.00169499	7/188	56/10877	0.00155039	10574/10575/3326/10576/7203/7520/5982	7	3
GO:0002478	antigen processing and presentation of exogenous peptide antigen	5.01346e-05	0.00179117	11/188	148/10877	0.00163837	5683/5695/375/5708/5692/5710/1175/10213/1173/6396/5694	11	3
GO:0019081	viral translation	5.47045e-05	0.00189696	4/188	13/10877	0.00173513	8666/8664/8662/51386	4	3
GO:1904814	regulation of protein localization to chromosome, telomeric region	5.47045e-05	0.00189696	4/188	13/10877	0.00173513	10574/54552/10575/10576	4	3
GO:0010972	negative regulation of G2/M transition of mitotic cell cycle	5.72545e-05	0.00195661	8/188	78/10877	0.0017897	6233/5683/5695/5708/5692/5710/10213/5694	8	3
GO:0019884	antigen processing and presentation of exogenous antigen	6.79069e-05	0.00228272	11/188	153/10877	0.00208799	5683/5695/375/5708/5692/5710/1175/10213/1173/6396/5694	11	3
GO:1901532	regulation of hematopoietic progenitor cell differentiation	6.87334e-05	0.00228272	8/188	80/10877	0.00208799	6233/5683/5695/5708/5692/5710/10213/5694	8	3
GO:0000027	ribosomal large subunit assembly	7.1623e-05	0.00232715	5/188	26/10877	0.00212862	6152/6125/6128/6135/6134	5	3
GO:0048002	antigen processing and presentation of peptide antigen	7.20449e-05	0.00232715	11/188	154/10877	0.00212862	5683/5695/375/5708/5692/5710/1175/10213/1173/6396/5694	11	3
GO:0002218	activation of innate immune response	7.41996e-05	0.00236281	13/188	211/10877	0.00216125	6233/5683/5695/5708/708/7323/5692/5710/10062/10213/7301/5694/7520	13	3
GO:0002474	antigen processing and presentation of peptide antigen via MHC class I	7.51531e-05	0.00236281	8/188	81/10877	0.00216125	5683/5695/5708/5692/5710/10213/6396/5694	8	3
GO:0051438	regulation of ubiquitin-protein transferase activity	7.69584e-05	0.00238773	6/188	42/10877	0.00218404	27338/6125/6187/6201/7332/6135	6	3
GO:1903827	regulation of cellular protein localization	7.85297e-05	0.00240484	19/188	407/10877	0.00219969	10574/5695/391/2010/7332/54552/7323/10575/8766/10541/3326/11261/1173/10576/7295/7203/11079/10204/8882	19	3
GO:0045089	positive regulation of innate immune response	8.09857e-05	0.00244826	14/188	243/10877	0.0022394	6233/5683/5695/5708/708/7323/5692/5710/10062/10213/7301/6223/5694/7520	14	3
GO:0035567	non-canonical Wnt signaling pathway	9.43064e-05	0.00277968	10/188	132/10877	0.00254255	6233/5683/5695/5708/5692/5710/1175/10213/1173/5694	10	3
GO:0050821	protein stabilization	9.43064e-05	0.00277968	10/188	132/10877	0.00254255	6125/10574/6201/10575/3326/124997/11261/6135/10576/7203	10	3
GO:0043488	regulation of mRNA stability	0.000100467	0.00292279	10/188	133/10877	0.00267345	6233/4869/5683/5695/1994/5708/5692/5710/10213/5694	10	3
GO:0000028	ribosomal small subunit assembly	0.000101641	0.00292279	4/188	15/10877	0.00267345	6218/6193/6204/6223	4	3
GO:0043618	regulation of transcription from RNA polymerase II promoter in response to stress	0.000117573	0.00334022	9/188	110/10877	0.00305527	6233/5683/5695/5708/7323/5692/5710/10213/5694	9	3
GO:0000209	protein polyubiquitination	0.000119313	0.00334929	14/188	252/10877	0.00306357	6233/9354/27338/5683/51255/5695/5708/7332/7323/5692/5710/246184/10213/5694	14	3
GO:0002479	antigen processing and presentation of exogenous peptide antigen via MHC class I, TAP-dependent	0.000123053	0.00341362	7/188	65/10877	0.00312241	5683/5695/5708/5692/5710/10213/5694	7	3
GO:2000278	regulation of DNA biosynthetic process	0.000125014	0.00342771	8/188	87/10877	0.00313529	10574/54552/10575/3326/10576/7203/7520/5982	8	3
GO:0032210	regulation of telomere maintenance via telomerase	0.000129765	0.00351707	6/188	46/10877	0.00321703	10574/54552/10575/10576/7203/7520	6	3
GO:0043487	regulation of RNA stability	0.000145054	0.00378573	10/188	139/10877	0.00346277	6233/4869/5683/5695/1994/5708/5692/5710/10213/5694	10	3
GO:0030490	maturation of SSU-rRNA	0.000146641	0.00378573	6/188	47/10877	0.00346277	6202/8602/25879/6217/6223/51096	6	3
GO:0002223	stimulatory C-type lectin receptor signaling pathway	0.000146725	0.00378573	8/188	89/10877	0.00346277	6233/5683/5695/5708/5692/5710/10213/5694	8	3
GO:1902750	negative regulation of cell cycle G2/M phase transition	0.000146725	0.00378573	8/188	89/10877	0.00346277	6233/5683/5695/5708/5692/5710/10213/5694	8	3
GO:0071897	DNA biosynthetic process	0.000148931	0.00378573	11/188	167/10877	0.00346277	6233/10574/55505/54552/10575/3326/10576/7203/7520/57804/5982	11	3
GO:0033238	regulation of cellular amine metabolic process	0.00014931	0.00378573	7/188	67/10877	0.00346277	5683/5695/5708/5692/5710/10213/5694	7	3
GO:0002220	innate immune response activating cell surface receptor signaling pathway	0.000158694	0.00398084	8/188	90/10877	0.00364124	6233/5683/5695/5708/5692/5710/10213/5694	8	3
GO:0045088	regulation of innate immune response	0.00016281	0.00402933	15/188	292/10877	0.0036856	6233/5683/5695/5708/708/7323/3326/5692/5710/10062/10213/7301/6223/5694/7520	15	3
GO:0042590	antigen processing and presentation of exogenous peptide antigen via MHC class I	0.000164044	0.00402933	7/188	68/10877	0.0036856	5683/5695/5708/5692/5710/10213/5694	7	3
GO:0002758	innate immune response-activating signal transduction	0.000172341	0.00415018	12/188	199/10877	0.00379613	6233/5683/5695/5708/708/7323/5692/5710/10062/10213/7301/5694	12	3
GO:0032212	positive regulation of telomere maintenance via telomerase	0.000172484	0.00415018	5/188	31/10877	0.00379613	10574/10575/10576/7203/7520	5	3
GO:0033209	tumor necrosis factor-mediated signaling pathway	0.000176642	0.00416521	9/188	116/10877	0.00380988	2950/6233/5683/5695/5708/5692/5710/10213/5694	9	3
GO:0043620	regulation of DNA-templated transcription in response to stress	0.000176642	0.00416521	9/188	116/10877	0.00380988	6233/5683/5695/5708/7323/5692/5710/10213/5694	9	3
GO:1904356	regulation of telomere maintenance via telomere lengthening	0.000207899	0.00485372	6/188	50/10877	0.00443966	10574/54552/10575/10576/7203/7520	6	3
GO:1904666	regulation of ubiquitin protein ligase activity	0.000218779	0.00505766	4/188	18/10877	0.0046262	27338/6125/6201/6135	4	3
GO:1902749	regulation of cell cycle G2/M phase transition	0.000224615	0.00514216	11/188	175/10877	0.00470349	6233/4869/5683/5695/5708/8766/5692/5710/10213/5694/93323	11	3
GO:0031647	regulation of protein stability	0.000227262	0.00515273	12/188	205/10877	0.00471315	6125/10574/6201/54552/10575/3326/124997/11261/6135/79577/10576/7203	12	3
GO:1904358	positive regulation of telomere maintenance via telomere lengthening	0.000234279	0.00525073	5/188	33/10877	0.0048028	10574/10575/10576/7203/7520	5	3
GO:1903320	regulation of protein modification by small protein conjugation or removal	0.000236038	0.00525073	11/188	176/10877	0.0048028	27338/6125/6187/6201/7329/7332/54552/3326/11261/6135/54472	11	3
GO:0061013	regulation of mRNA catabolic process	0.000256172	0.00564535	10/188	149/10877	0.00516375	6233/4869/5683/5695/1994/5708/5692/5710/10213/5694	10	3
GO:0044106	cellular amine metabolic process	0.000266997	0.00582945	8/188	97/10877	0.00533214	5683/5695/5708/5692/5710/10213/5694/6723	8	3
GO:0019882	antigen processing and presentation	0.000286776	0.00620383	11/188	180/10877	0.00567459	5683/5695/375/5708/5692/5710/1175/10213/1173/6396/5694	11	3
GO:0043161	proteasome-mediated ubiquitin-dependent protein catabolic process	0.000305877	0.0065249	16/188	344/10877	0.00596827	6233/9354/27338/5683/51255/5695/5708/7323/3326/5692/5710/6135/246184/10213/5694/55968	16	3
GO:0038061	NIK/NF-kappaB signaling	0.000307152	0.0065249	8/188	99/10877	0.00596827	6233/5683/5695/5708/5692/5710/10213/5694	8	3
GO:1905330	regulation of morphogenesis of an epithelium	0.000317209	0.00667838	10/188	153/10877	0.00610866	6233/5683/5695/5708/5692/5710/1175/10213/1173/5694	10	3
GO:0009308	amine metabolic process	0.000352108	0.00723332	8/188	101/10877	0.00661626	5683/5695/5708/5692/5710/10213/5694/6723	8	3
GO:2000736	regulation of stem cell differentiation	0.000352108	0.00723332	8/188	101/10877	0.00661626	6233/5683/5695/5708/5692/5710/10213/5694	8	3
GO:0010498	proteasomal protein catabolic process	0.00035277	0.00723332	17/188	384/10877	0.00661626	6233/9354/27338/5683/51255/5695/5708/7323/3326/5692/5710/6135/246184/10213/6388/5694/55968	17	3
GO:0031349	positive regulation of defense response	0.000368815	0.00746863	15/188	315/10877	0.00683149	6233/5683/5695/5708/708/7323/5692/5710/10062/10213/293/7301/6223/5694/7520	15	3
GO:0038093	Fc receptor signaling pathway	0.000370581	0.00746863	10/188	156/10877	0.00683149	6233/5683/5695/5708/3326/5692/5710/10213/55845/5694	10	3
GO:0010389	regulation of G2/M transition of mitotic cell cycle	0.000410166	0.00814184	10/188	158/10877	0.00744727	6233/5683/5695/5708/8766/5692/5710/10213/5694/93323	10	3
GO:0010499	proteasomal ubiquitin-independent protein catabolic process	0.00041089	0.00814184	4/188	21/10877	0.00744727	5683/5695/5692/5694	4	3
GO:0006403	RNA localization	0.000435375	0.00855285	11/188	189/10877	0.00782321	4869/10574/11269/55505/8563/10575/10576/84271/6396/7203/10204	11	3
GO:0071347	cellular response to interleukin-1	0.000438887	0.00855285	9/188	131/10877	0.00782321	6233/5683/5695/5708/5692/5710/10213/5694/54472	9	3
GO:0002244	hematopoietic progenitor cell differentiation	0.000490492	0.00948017	9/188	133/10877	0.00867143	6233/5683/5695/5708/5692/5710/10213/5694/7520	9	3
GO:0038095	Fc-epsilon receptor signaling pathway	0.000520131	0.00997129	8/188	107/10877	0.00912065	6233/5683/5695/5708/5692/5710/10213/5694	8	3
GO:0030178	negative regulation of Wnt signaling pathway	0.000524777	0.00997922	10/188	163/10877	0.00912791	6233/5683/10042/5800/5695/5708/5692/5710/10213/5694	10	3
GO:0070203	regulation of establishment of protein localization to telomere	0.000557621	0.010519	3/188	10/10877	0.00962161	10574/10575/10576	3	3
GO:0090263	positive regulation of canonical Wnt signaling pathway	0.00058875	0.011018	8/188	109/10877	0.0100781	6233/5683/5695/5708/5692/5710/10213/5694	8	3
GO:0043312	neutrophil degranulation	0.00064137	0.0118203	16/188	368/10877	0.0108119	2950/23071/5683/5695/127829/5708/391/3326/10213/2665/11333/10576/7520/3482/54472/53917	16	3
GO:0030177	positive regulation of Wnt signaling pathway	0.000641643	0.0118203	9/188	138/10877	0.0108119	6233/5683/5695/5708/5692/5710/10213/79577/5694	9	3
GO:0046822	regulation of nucleocytoplasmic transport	0.0006528	0.0119075	7/188	85/10877	0.0108916	2010/10541/3326/11261/7295/10204/8882	7	3
GO:0002283	neutrophil activation involved in immune response	0.000660404	0.0119075	16/188	369/10877	0.0108916	2950/23071/5683/5695/127829/5708/391/3326/10213/2665/11333/10576/7520/3482/54472/53917	16	3
GO:0006458	de novo protein folding	0.000661525	0.0119075	5/188	41/10877	0.0108916	10574/3306/10575/10576/7203	5	3
GO:0090090	negative regulation of canonical Wnt signaling pathway	0.000711893	0.012717	9/188	140/10877	0.0116321	6233/5683/5800/5695/5708/5692/5710/10213/5694	9	3
GO:0042306	regulation of protein import into nucleus	0.000740521	0.0131289	5/188	42/10877	0.0120089	3326/11261/7295/10204/8882	5	3
GO:0070202	regulation of establishment of protein localization to chromosome	0.000757001	0.013321	3/188	11/10877	0.0121846	10574/10575/10576	3	3
GO:0042119	neutrophil activation	0.000807696	0.0141077	16/188	376/10877	0.0129042	2950/23071/5683/5695/127829/5708/391/3326/10213/2665/11333/10576/7520/3482/54472/53917	16	3
GO:1903311	regulation of mRNA metabolic process	0.000870857	0.014996	12/188	238/10877	0.0137167	6233/4869/5683/5695/1994/5708/708/5692/5710/10213/79577/5694	12	3
GO:0090316	positive regulation of intracellular protein transport	0.00087127	0.014996	9/188	144/10877	0.0137167	5695/2010/7332/7323/10541/3326/11261/10204/8882	9	3
GO:0002446	neutrophil mediated immunity	0.000903821	0.0154435	16/188	380/10877	0.0141261	2950/23071/5683/5695/127829/5708/391/3326/10213/2665/11333/10576/7520/3482/54472/53917	16	3
GO:0032206	positive regulation of telomere maintenance	0.000919398	0.0155967	5/188	44/10877	0.0142662	10574/10575/10576/7203/7520	5	3
GO:0036230	granulocyte activation	0.00092932	0.0156524	16/188	381/10877	0.0143171	2950/23071/5683/5695/127829/5708/391/3326/10213/2665/11333/10576/7520/3482/54472/53917	16	3
GO:0032204	regulation of telomere maintenance	0.000946087	0.0158199	6/188	66/10877	0.0144703	10574/54552/10575/10576/7203/7520	6	3
GO:0007339	binding of sperm to zona pellucida	0.000959389	0.0158199	4/188	26/10877	0.0144703	10574/10575/10576/7203	4	3
GO:0070979	protein K11-linked ubiquitination	0.000959389	0.0158199	4/188	26/10877	0.0144703	27338/7332/7323/246184	4	3
GO:1901991	negative regulation of mitotic cell cycle phase transition	0.000994255	0.0160948	10/188	177/10877	0.0147217	6233/4869/5683/5695/5708/5692/5710/10213/79577/5694	10	3
GO:0051444	negative regulation of ubiquitin-protein transferase activity	0.000996537	0.0160948	3/188	12/10877	0.0147217	6125/6201/6135	3	3
GO:0070200	establishment of protein localization to telomere	0.000996537	0.0160948	3/188	12/10877	0.0147217	10574/10575/10576	3	3
GO:0070555	response to interleukin-1	0.00111013	0.0178073	9/188	149/10877	0.0162882	6233/5683/5695/5708/5692/5710/10213/5694/54472	9	3
GO:1904589	regulation of protein import	0.00112858	0.0179811	5/188	46/10877	0.0164471	3326/11261/7295/10204/8882	5	3
GO:0031396	regulation of protein ubiquitination	0.00116372	0.0184165	9/188	150/10877	0.0168454	27338/6125/6187/6201/7332/54552/3326/11261/6135	9	3
GO:0044839	cell cycle G2/M phase transition	0.00117321	0.0184429	11/188	213/10877	0.0168696	6233/4869/5683/5695/5708/8766/5692/5710/10213/5694/93323	11	3
GO:0006611	protein export from nucleus	0.0012194	0.019042	9/188	151/10877	0.0174175	4869/11269/2010/8563/10541/11261/84271/7295/10204	9	3
GO:0046824	positive regulation of nucleocytoplasmic transport	0.00137109	0.02127	5/188	48/10877	0.0194555	2010/10541/3326/10204/8882	5	3
GO:0032388	positive regulation of intracellular transport	0.00150649	0.0232176	10/188	187/10877	0.0212369	5695/375/2010/7332/7323/10541/3326/11261/10204/8882	10	3
GO:0071453	cellular response to oxygen levels	0.00156774	0.0240047	10/188	188/10877	0.0219569	6233/5683/5695/147007/5708/7323/5692/5710/10213/5694	10	3
GO:0035036	sperm-egg recognition	0.00166646	0.0253517	4/188	30/10877	0.0231889	10574/10575/10576/7203	4	3
GO:1901988	negative regulation of cell cycle phase transition	0.00169632	0.0256405	10/188	190/10877	0.0234531	6233/4869/5683/5695/5708/5692/5710/10213/79577/5694	10	3
GO:0043299	leukocyte degranulation	0.00179785	0.0269438	16/188	406/10877	0.0246453	2950/23071/5683/5695/127829/5708/391/3326/10213/2665/11333/10576/7520/3482/54472/53917	16	3
GO:0045727	positive regulation of translation	0.0018054	0.0269438	7/188	101/10877	0.0246453	6125/4869/1994/6203/708/8664/84271	7	3
GO:1901998	toxin transport	0.00188779	0.0278535	4/188	31/10877	0.0254773	10574/10575/10576/7203	4	3
GO:0002275	myeloid cell activation involved in immune response	0.00188997	0.0278535	16/188	408/10877	0.0254773	2950/23071/5683/5695/127829/5708/391/3326/10213/2665/11333/10576/7520/3482/54472/53917	16	3
GO:0051973	positive regulation of telomerase activity	0.00212867	0.0311765	4/188	32/10877	0.0285168	10575/3326/10576/7520	4	3
GO:0051168	nuclear export	0.00215989	0.0314384	9/188	164/10877	0.0287564	4869/11269/2010/8563/10541/11261/84271/7295/10204	9	3
GO:0000086	G2/M transition of mitotic cell cycle	0.00221533	0.0318521	10/188	197/10877	0.0291348	6233/5683/5695/5708/8766/5692/5710/10213/5694/93323	10	3
GO:0033157	regulation of intracellular protein transport	0.00221533	0.0318521	10/188	197/10877	0.0291348	5695/2010/7332/7323/10541/3326/11261/7295/10204/8882	10	3
GO:0002444	myeloid leukocyte mediated immunity	0.00224421	0.0320718	16/188	415/10877	0.0293358	2950/23071/5683/5695/127829/5708/391/3326/10213/2665/11333/10576/7520/3482/54472/53917	16	3
GO:0071456	cellular response to hypoxia	0.00234552	0.0333177	9/188	166/10877	0.0304754	6233/5683/5695/5708/7323/5692/5710/10213/5694	9	3
GO:0034504	protein localization to nucleus	0.00238503	0.0335083	10/188	199/10877	0.0306498	10574/10575/3326/11261/6135/10576/7295/7203/10204/8882	10	3
GO:0030111	regulation of Wnt signaling pathway	0.00238736	0.0335083	12/188	268/10877	0.0306498	6233/5683/10042/5800/5695/5708/2010/5692/5710/10213/79577/5694	12	3
GO:0060249	anatomical structure homeostasis	0.00253818	0.0354143	12/188	270/10877	0.0323932	10574/55505/54552/10575/3326/6647/7301/10576/7203/7520/57804/5982	12	3
GO:0044770	cell cycle phase transition	0.00256242	0.0354919	17/188	460/10877	0.0324642	6233/27338/4869/5683/5695/6194/5708/7332/8766/5692/5710/246184/10213/79577/5694/93323/8882	17	3
GO:0010565	regulation of cellular ketone metabolic process	0.00257384	0.0354919	8/188	137/10877	0.0324642	5683/5695/5708/5692/5710/10062/10213/5694	8	3
GO:0031397	negative regulation of protein ubiquitination	0.00273699	0.0373456	5/188	56/10877	0.0341597	6125/6201/54552/11261/6135	5	3
GO:0006457	protein folding	0.00275578	0.0373456	10/188	203/10877	0.0341597	6233/23071/53938/10574/6902/3306/10575/3326/10576/7203	10	3
GO:2000027	regulation of organ morphogenesis	0.00275578	0.0373456	10/188	203/10877	0.0341597	6233/5683/5695/5708/5692/5710/1175/10213/1173/5694	10	3
GO:0002274	myeloid leukocyte activation	0.00286502	0.0385046	17/188	465/10877	0.0352198	2950/23071/5683/5695/127829/5708/391/3326/10062/10213/2665/11333/10576/7520/3482/54472/53917	17	3
GO:0002183	cytoplasmic translational initiation	0.00289029	0.0385046	3/188	17/10877	0.0352198	23521/8664/10480	3	3
GO:0035459	cargo loading into vesicle	0.00289029	0.0385046	3/188	17/10877	0.0352198	10959/6396/56681	3	3
GO:0045930	negative regulation of mitotic cell cycle	0.00291246	0.0385819	11/188	239/10877	0.0352905	6233/4869/5683/5695/6194/5708/5692/5710/10213/79577/5694	11	3
GO:2000059	negative regulation of ubiquitin-dependent protein catabolic process	0.00297715	0.0390334	4/188	35/10877	0.0357036	6125/6201/3326/6135	4	3
GO:0036294	cellular response to decreased oxygen levels	0.00297965	0.0390334	9/188	172/10877	0.0357036	6233/5683/5695/5708/7323/5692/5710/10213/5694	9	3
GO:0060828	regulation of canonical Wnt signaling pathway	0.00317135	0.041135	10/188	207/10877	0.0376258	6233/5683/5800/5695/5708/2010/5692/5710/10213/5694	10	3
GO:0002757	immune response-activating signal transduction	0.00317496	0.041135	14/188	352/10877	0.0376258	6233/5683/5695/5708/708/7323/3326/5692/5710/10062/10213/7301/55845/5694	14	3
GO:1901990	regulation of mitotic cell cycle phase transition	0.00332434	0.0428349	13/188	316/10877	0.0391807	6233/4869/5683/5695/5708/8766/5692/5710/246184/10213/79577/5694/93323	13	3
GO:0006913	nucleocytoplasmic transport	0.0034134	0.0435585	12/188	280/10877	0.0398425	4869/11269/2010/8563/10541/3326/11261/84271/7295/6635/10204/8882	12	3
GO:0044772	mitotic cell cycle phase transition	0.00341744	0.0435585	16/188	433/10877	0.0398425	6233/27338/4869/5683/5695/6194/5708/8766/5692/5710/246184/10213/79577/5694/93323/8882	16	3
GO:0051169	nuclear transport	0.00371899	0.0471472	12/188	283/10877	0.0431251	4869/11269/2010/8563/10541/3326/11261/84271/7295/6635/10204/8882	12	3
Gene set 54	GSE16348_D5_VS_D1_IMMOBILIZED_MUSCLE_DN								1
ID	Description	pvalue	p.adjust	GeneRatio	BgRatio	qvalue	geneID	Count	2
GO:0045333	cellular respiration	2.03327e-32	4.87579e-29	36/184	146/10877	4.51173e-29	1737/2108/7386/4719/1537/5162/4698/9377/4706/1738/4711/8803/4720/6390/50/4190/6392/4705/3419/8604/6389/4708/4717/3418/4191/54539/7388/4712/10975/5160/7384/4704/4714/54205/4709/27089	36	3
GO:0015980	energy derivation by oxidation of organic compounds	1.25196e-29	1.5011e-26	39/184	215/10877	1.38902e-26	1737/2108/7386/4719/1537/5162/4698/9377/4706/1738/178/4711/8803/4720/6390/50/4190/6392/4705/3419/8604/6389/4708/4717/3418/4191/54539/7388/4712/10975/5160/5213/5239/7384/4704/4714/54205/4709/27089	39	3
GO:0006091	generation of precursor metabolites and energy	1.97977e-29	1.5825e-26	49/184	393/10877	1.46434e-26	1737/5230/2108/7386/4719/1537/5162/4698/516/9377/4706/1738/178/4711/8803/622/4720/6390/50/4190/10105/6392/50507/506/5315/4705/3419/8604/6389/4708/4717/3418/3939/4191/54539/7388/509/4712/10975/5160/5213/5239/7384/4704/498/4714/54205/4709/27089	49	3
GO:0006119	oxidative phosphorylation	2.34722e-27	1.40716e-24	29/184	108/10877	1.30209e-24	7386/4719/1537/4698/516/9377/4706/1738/4711/4720/10105/6392/506/4705/6389/4708/4717/54539/7388/509/4712/10975/7384/4704/498/4714/54205/4709/27089	29	3
GO:0022904	respiratory electron transport chain	8.0562e-27	3.86375e-24	27/184	91/10877	3.57525e-24	2108/7386/4719/1537/4698/9377/4706/1738/4711/4720/6390/6392/4705/8604/6389/4708/4717/54539/7388/4712/10975/7384/4704/4714/54205/4709/27089	27	3
GO:0042775	mitochondrial ATP synthesis coupled electron transport	1.15605e-24	4.62033e-22	24/184	76/10877	4.27535e-22	7386/4719/1537/4698/9377/4706/1738/4711/4720/6392/4705/6389/4708/4717/54539/7388/4712/10975/7384/4704/4714/54205/4709/27089	24	3
GO:0042773	ATP synthesis coupled electron transport	1.65569e-24	5.67192e-22	24/184	77/10877	5.24841e-22	7386/4719/1537/4698/9377/4706/1738/4711/4720/6392/4705/6389/4708/4717/54539/7388/4712/10975/7384/4704/4714/54205/4709/27089	24	3
GO:0022900	electron transport chain	1.67579e-22	5.02318e-20	28/184	141/10877	4.64811e-20	2108/7386/4719/1537/4698/9377/4706/1738/4711/4720/6390/6392/50507/4705/8604/6389/4708/4717/54539/7388/4712/10975/7384/4704/4714/54205/4709/27089	28	3
GO:0046034	ATP metabolic process	1.01405e-21	2.70189e-19	33/184	230/10877	2.50014e-19	5230/7386/4719/1537/4698/516/9377/4706/1738/4711/4720/10105/6392/506/5315/4705/6389/4708/4717/3939/54539/7388/509/4712/10975/5213/7384/4704/498/4714/54205/4709/27089	33	3
GO:0009205	purine ribonucleoside triphosphate metabolic process	2.00292e-21	4.803e-19	34/184	253/10877	4.44437e-19	5230/7386/4719/1537/4698/516/9377/4706/1738/4711/4720/10105/6392/506/5315/4705/6389/4708/9054/4717/3939/54539/7388/509/4712/10975/5213/7384/4704/498/4714/54205/4709/27089	34	3
GO:0009144	purine nucleoside triphosphate metabolic process	4.32866e-21	8.65011e-19	34/184	259/10877	8.00422e-19	5230/7386/4719/1537/4698/516/9377/4706/1738/4711/4720/10105/6392/506/5315/4705/6389/4708/9054/4717/3939/54539/7388/509/4712/10975/5213/7384/4704/498/4714/54205/4709/27089	34	3
GO:0009199	ribonucleoside triphosphate metabolic process	4.32866e-21	8.65011e-19	34/184	259/10877	8.00422e-19	5230/7386/4719/1537/4698/516/9377/4706/1738/4711/4720/10105/6392/506/5315/4705/6389/4708/9054/4717/3939/54539/7388/509/4712/10975/5213/7384/4704/498/4714/54205/4709/27089	34	3
GO:0009141	nucleoside triphosphate metabolic process	3.44055e-20	6.34649e-18	34/184	276/10877	5.87262e-18	5230/7386/4719/1537/4698/516/9377/4706/1738/4711/4720/10105/6392/506/5315/4705/6389/4708/9054/4717/3939/54539/7388/509/4712/10975/5213/7384/4704/498/4714/54205/4709/27089	34	3
GO:0009126	purine nucleoside monophosphate metabolic process	7.3568e-20	1.17611e-17	33/184	263/10877	1.08829e-17	5230/7386/4719/1537/4698/516/9377/4706/1738/4711/4720/10105/6392/506/5315/4705/6389/4708/4717/3939/54539/7388/509/4712/10975/5213/7384/4704/498/4714/54205/4709/27089	33	3
GO:0009167	purine ribonucleoside monophosphate metabolic process	7.3568e-20	1.17611e-17	33/184	263/10877	1.08829e-17	5230/7386/4719/1537/4698/516/9377/4706/1738/4711/4720/10105/6392/506/5315/4705/6389/4708/4717/3939/54539/7388/509/4712/10975/5213/7384/4704/498/4714/54205/4709/27089	33	3
GO:0009161	ribonucleoside monophosphate metabolic process	2.66582e-19	3.9954e-17	33/184	274/10877	3.69707e-17	5230/7386/4719/1537/4698/516/9377/4706/1738/4711/4720/10105/6392/506/5315/4705/6389/4708/4717/3939/54539/7388/509/4712/10975/5213/7384/4704/498/4714/54205/4709/27089	33	3
GO:0009123	nucleoside monophosphate metabolic process	8.15296e-19	1.15005e-16	33/184	284/10877	1.06418e-16	5230/7386/4719/1537/4698/516/9377/4706/1738/4711/4720/10105/6392/506/5315/4705/6389/4708/4717/3939/54539/7388/509/4712/10975/5213/7384/4704/498/4714/54205/4709/27089	33	3
GO:0072350	tricarboxylic acid metabolic process	1.62546e-16	2.16548e-14	14/184	35/10877	2.00378e-14	1737/445/5162/1738/8803/6390/50/4190/6392/3419/6389/3418/4191/5160	14	3
GO:0006099	tricarboxylic acid cycle	1.82032e-16	2.29744e-14	13/184	28/10877	2.12589e-14	1737/5162/1738/8803/6390/50/4190/6392/3419/6389/3418/4191/5160	13	3
GO:0072521	purine-containing compound metabolic process	3.48636e-16	4.18014e-14	37/184	444/10877	3.86802e-14	5230/7386/4719/1537/4698/516/10768/9377/4706/1738/4711/4720/10105/6392/506/5315/4705/10400/6389/4708/9054/4717/3939/54539/7388/509/64087/4712/10975/5213/7384/4704/498/4714/54205/4709/27089	37	3
GO:0009150	purine ribonucleotide metabolic process	8.119e-16	9.27112e-14	35/184	405/10877	8.57887e-14	5230/7386/4719/1537/4698/516/9377/4706/1738/4711/4720/10105/6392/506/5315/4705/6389/4708/9054/4717/3939/54539/7388/509/64087/4712/10975/5213/7384/4704/498/4714/54205/4709/27089	35	3
GO:0009060	aerobic respiration	1.30301e-15	1.42028e-13	17/184	70/10877	1.31423e-13	1737/5162/9377/1738/8803/6390/50/4190/6392/3419/6389/3418/4191/7388/5160/7384/54205	17	3
GO:0006101	citrate metabolic process	1.59222e-15	1.66006e-13	13/184	32/10877	1.53611e-13	1737/5162/1738/8803/6390/50/4190/6392/3419/6389/3418/4191/5160	13	3
GO:0006120	mitochondrial electron transport, NADH to ubiquinone	2.26035e-15	2.13443e-13	14/184	41/10877	1.97506e-13	4719/4698/4706/1738/4711/4720/4705/4708/4717/54539/4712/4704/4714/4709	14	3
GO:0006163	purine nucleotide metabolic process	2.31423e-15	2.13443e-13	35/184	419/10877	1.97506e-13	5230/7386/4719/1537/4698/516/9377/4706/1738/4711/4720/10105/6392/506/5315/4705/6389/4708/9054/4717/3939/54539/7388/509/64087/4712/10975/5213/7384/4704/498/4714/54205/4709/27089	35	3
GO:0009259	ribonucleotide metabolic process	2.31423e-15	2.13443e-13	35/184	419/10877	1.97506e-13	5230/7386/4719/1537/4698/516/9377/4706/1738/4711/4720/10105/6392/506/5315/4705/6389/4708/9054/4717/3939/54539/7388/509/64087/4712/10975/5213/7384/4704/498/4714/54205/4709/27089	35	3
GO:0019693	ribose phosphate metabolic process	5.48901e-15	4.87506e-13	35/184	431/10877	4.51105e-13	5230/7386/4719/1537/4698/516/9377/4706/1738/4711/4720/10105/6392/506/5315/4705/6389/4708/9054/4717/3939/54539/7388/509/64087/4712/10975/5213/7384/4704/498/4714/54205/4709/27089	35	3
GO:0010257	NADH dehydrogenase complex assembly	9.64996e-14	7.97952e-12	14/184	52/10877	7.38371e-12	4719/4698/4706/4711/4720/4705/51295/4708/4717/54539/4712/4704/4714/4709	14	3
GO:0032981	mitochondrial respiratory chain complex I assembly	9.64996e-14	7.97952e-12	14/184	52/10877	7.38371e-12	4719/4698/4706/4711/4720/4705/51295/4708/4717/54539/4712/4704/4714/4709	14	3
GO:0033108	mitochondrial respiratory chain complex assembly	1.98746e-13	1.58864e-11	16/184	79/10877	1.47002e-11	4719/4698/4706/4711/4720/55245/4705/51295/4708/4717/54539/4712/4704/4714/389203/4709	16	3
GO:0007005	mitochondrion organization	3.99703e-12	3.0919e-10	32/184	452/10877	2.86103e-10	10935/4719/4698/516/4706/4711/9927/4720/2034/4285/10105/55245/506/4705/10400/51295/7416/4708/4717/3418/5864/54539/509/4712/4704/498/4714/54205/389203/79135/4709/211	32	3
GO:0006122	mitochondrial electron transport, ubiquinol to cytochrome c	1.10263e-10	8.26283e-09	7/184	11/10877	7.64586e-09	7386/1537/7388/10975/7384/54205/27089	7	3
GO:0016999	antibiotic metabolic process	2.01668e-09	1.46545e-07	14/184	104/10877	1.35603e-07	1737/10935/5162/1738/8803/6390/50/4190/6392/3419/6389/3418/4191/5160	14	3
GO:0051186	cofactor metabolic process	4.79523e-08	3.38205e-06	26/184	456/10877	3.12952e-06	1737/5230/10935/5162/8050/10768/1738/54956/8803/79944/4190/5315/10400/2806/9054/3418/3939/9104/4191/64087/5160/5213/4704/1622/2805/211	26	3
GO:0006732	coenzyme metabolic process	9.12442e-08	6.25153e-06	21/184	318/10877	5.78474e-06	1737/5230/5162/8050/10768/1738/54956/8803/4190/5315/10400/9054/3418/3939/9104/4191/64087/5160/5213/4704/1622	21	3
GO:0043648	dicarboxylic acid metabolic process	1.73089e-07	1.15296e-05	11/184	85/10877	1.06687e-05	445/1738/8803/79944/6390/4190/6389/2806/3418/4191/2805	11	3
GO:0010510	regulation of acetyl-CoA biosynthetic process from pyruvate	9.43869e-07	5.95631e-05	5/184	12/10877	5.51157e-05	1737/5162/8050/1738/5160	5	3
GO:0050812	regulation of acyl-CoA biosynthetic process	9.43869e-07	5.95631e-05	5/184	12/10877	5.51157e-05	1737/5162/8050/1738/5160	5	3
GO:0045214	sarcomere organization	1.29317e-06	7.95135e-05	7/184	34/10877	7.35764e-05	8736/88/1073/11155/7138/5629/8557	7	3
GO:0006006	glucose metabolic process	1.84664e-06	0.000110706	13/184	153/10877	0.00010244	1737/5230/5162/4190/5315/8604/2806/9104/4191/5160/5213/5239/2805	13	3
GO:0006086	acetyl-CoA biosynthetic process from pyruvate	2.32103e-06	0.000135752	5/184	14/10877	0.000125616	1737/5162/8050/1738/5160	5	3
GO:0006733	oxidoreduction coenzyme metabolic process	2.84468e-06	0.000162418	13/184	159/10877	0.00015029	5230/5162/8050/1738/54956/4190/5315/3418/3939/4191/5160/5213/4704	13	3
GO:0019318	hexose metabolic process	3.54022e-06	0.000197429	14/184	188/10877	0.000182688	1737/5230/5162/4190/5315/8604/2806/9104/4191/5160/5213/5239/4351/2805	14	3
GO:0006103	2-oxoglutarate metabolic process	4.92647e-06	0.000262526	5/184	16/10877	0.000242924	1738/79944/2806/3418/2805	5	3
GO:0042762	regulation of sulfur metabolic process	4.92647e-06	0.000262526	5/184	16/10877	0.000242924	1737/5162/8050/1738/5160	5	3
GO:0019362	pyridine nucleotide metabolic process	5.69399e-06	0.000290514	12/184	144/10877	0.000268822	5230/5162/8050/1738/54956/4190/5315/3418/3939/4191/5160/5213	12	3
GO:0046496	nicotinamide nucleotide metabolic process	5.69399e-06	0.000290514	12/184	144/10877	0.000268822	5230/5162/8050/1738/54956/4190/5315/3418/3939/4191/5160/5213	12	3
GO:0051188	cofactor biosynthetic process	6.52098e-06	0.000325777	16/184	255/10877	0.000301452	1737/5230/5162/8050/1738/54956/8803/5315/9054/3418/3939/9104/5160/5213/4704/211	16	3
GO:0072524	pyridine-containing compound metabolic process	8.09955e-06	0.000396382	12/184	149/10877	0.000366785	5230/5162/8050/1738/54956/4190/5315/3418/3939/4191/5160/5213	12	3
GO:0009108	coenzyme biosynthetic process	1.14008e-05	0.00054678	14/184	208/10877	0.000505953	1737/5230/5162/8050/1738/54956/5315/9054/3418/3939/9104/5160/5213/4704	14	3
GO:0006085	acetyl-CoA biosynthetic process	1.25843e-05	0.000580331	5/184	19/10877	0.000536999	1737/5162/8050/1738/5160	5	3
GO:0042776	mitochondrial ATP synthesis coupled proton transport	1.25843e-05	0.000580331	5/184	19/10877	0.000536999	1537/516/506/509/498	5	3
GO:0005996	monosaccharide metabolic process	1.65909e-05	0.000750658	14/184	215/10877	0.000694609	1737/5230/5162/4190/5315/8604/2806/9104/4191/5160/5213/5239/4351/2805	14	3
GO:0006107	oxaloacetate metabolic process	2.38377e-05	0.00105857	4/184	11/10877	0.00097953	4190/2806/4191/2805	4	3
GO:0030239	myofibril assembly	2.48754e-05	0.00108457	7/184	52/10877	0.00100359	8736/88/1073/11155/7138/5629/8557	7	3
GO:0015985	energy coupled proton transport, down electrochemical gradient	3.44683e-05	0.00145009	5/184	23/10877	0.00134181	1537/516/506/509/498	5	3
GO:0015986	ATP synthesis coupled proton transport	3.44683e-05	0.00145009	5/184	23/10877	0.00134181	1537/516/506/509/498	5	3
GO:1901605	alpha-amino acid metabolic process	4.31772e-05	0.00178515	12/184	176/10877	0.00165186	445/10768/1738/138199/587/50507/1160/10400/2806/64087/2805/2875	12	3
GO:0010927	cellular component assembly involved in morphogenesis	5.90557e-05	0.00240026	8/184	80/10877	0.00222104	8736/88/1073/11155/7138/23332/5629/8557	8	3
GO:0044282	small molecule catabolic process	6.54659e-05	0.00261645	17/184	341/10877	0.00242109	5230/2108/4706/1738/622/138199/587/5315/2806/3033/64087/51449/5213/5239/2805/5825/2875	17	3
GO:0019674	NAD metabolic process	7.13649e-05	0.00280546	7/184	61/10877	0.00259598	5230/54956/4190/5315/3939/4191/5213	7	3
GO:0006936	muscle contraction	7.32295e-05	0.00283233	14/184	246/10877	0.00262084	8736/88/1756/4638/23676/1160/7871/1837/8082/4151/488/7138/8557/3270	14	3
GO:0042407	cristae formation	7.82779e-05	0.00297953	5/184	27/10877	0.00275706	516/506/509/498/79135	5	3
GO:0005975	carbohydrate metabolic process	8.32013e-05	0.00311745	20/184	454/10877	0.00288468	1737/5230/5162/4706/178/64921/4190/5315/3419/8604/2806/3418/3939/9104/4191/5160/5213/5239/4351/2805	20	3
GO:0032787	monocarboxylic acid metabolic process	8.83725e-05	0.00326026	20/184	456/10877	0.00301683	1737/5230/2108/5162/8050/4706/1738/284273/5315/2806/3418/3939/9104/114876/3033/64087/5160/5629/5213/5825	20	3
GO:0006090	pyruvate metabolic process	0.000131422	0.00474625	9/184	114/10877	0.00439186	1737/5230/5162/8050/1738/5315/3939/5160/5213	9	3
GO:0006084	acetyl-CoA metabolic process	0.00013261	0.00474625	5/184	30/10877	0.00439186	1737/5162/8050/1738/5160	5	3
GO:0046364	monosaccharide biosynthetic process	0.000157519	0.00555487	7/184	69/10877	0.0051401	5230/4190/8604/2806/9104/4191/2805	7	3
GO:0006754	ATP biosynthetic process	0.000182433	0.00634022	9/184	119/10877	0.00586681	5230/1537/516/506/5315/3939/509/5213/498	9	3
GO:0006790	sulfur compound metabolic process	0.000188517	0.00645806	14/184	269/10877	0.00597585	1737/5162/8050/10768/1738/8803/50507/10400/9054/284/64087/51449/5160/1622	14	3
GO:0009063	cellular amino acid catabolic process	0.00019965	0.00674309	8/184	95/10877	0.0062396	1738/138199/587/2806/64087/51449/2805/2875	8	3
GO:0010632	regulation of epithelial cell migration	0.000205633	0.00684873	11/184	177/10877	0.00633735	64081/5797/506/284/4223/5176/23332/5629/498/54567/57142	11	3
GO:0006734	NADH metabolic process	0.000245134	0.00805247	5/184	34/10877	0.00745122	5230/4190/5315/4191/5213	5	3
GO:0031032	actomyosin structure organization	0.000266916	0.00864953	10/184	153/10877	0.0080037	8736/88/1073/50507/11155/23671/7138/23332/5629/8557	10	3
GO:0009206	purine ribonucleoside triphosphate biosynthetic process	0.000280699	0.00897489	9/184	126/10877	0.00830475	5230/1537/516/506/5315/3939/509/5213/498	9	3
GO:0009145	purine nucleoside triphosphate biosynthetic process	0.000297776	0.00918855	9/184	127/10877	0.00850247	5230/1537/516/506/5315/3939/509/5213/498	9	3
GO:0003012	muscle system process	0.000302709	0.00918855	15/184	316/10877	0.00850247	8736/88/1756/4638/23676/1160/7871/1837/29995/8082/4151/488/7138/8557/3270	15	3
GO:0016053	organic acid biosynthetic process	0.000302709	0.00918855	15/184	316/10877	0.00850247	5230/445/4706/8803/587/5315/2806/3939/9104/114876/5629/5213/2805/5825/2875	15	3
GO:0046394	carboxylic acid biosynthetic process	0.000302709	0.00918855	15/184	316/10877	0.00850247	5230/445/4706/8803/587/5315/2806/3939/9104/114876/5629/5213/2805/5825/2875	15	3
GO:0006941	striated muscle contraction	0.000315704	0.00934641	9/184	128/10877	0.00864854	8736/1756/23676/1837/4151/488/7138/8557/3270	9	3
GO:0055001	muscle cell development	0.000315704	0.00934641	9/184	128/10877	0.00864854	8736/88/1756/1073/11155/488/7138/5629/8557	9	3
GO:0007007	inner mitochondrial membrane organization	0.000323155	0.00945032	5/184	36/10877	0.00874469	516/506/509/498/79135	5	3
GO:0010631	epithelial cell migration	0.000356478	0.0102992	12/184	220/10877	0.00953018	11156/64081/5797/506/284/4223/5176/23332/5629/498/54567/57142	12	3
GO:0090132	epithelium migration	0.000371468	0.0106045	12/184	221/10877	0.0098127	11156/64081/5797/506/284/4223/5176/23332/5629/498/54567/57142	12	3
GO:0009201	ribonucleoside triphosphate biosynthetic process	0.000396594	0.010937	9/184	132/10877	0.0101203	5230/1537/516/506/5315/3939/509/5213/498	9	3
GO:0006637	acyl-CoA metabolic process	0.000396796	0.010937	7/184	80/10877	0.0101203	1737/5162/8050/1738/8803/5160/1622	7	3
GO:0035383	thioester metabolic process	0.000396796	0.010937	7/184	80/10877	0.0101203	1737/5162/8050/1738/8803/5160/1622	7	3
GO:0016054	organic acid catabolic process	0.000419681	0.0112419	12/184	224/10877	0.0104025	2108/4706/1738/138199/587/2806/3033/64087/51449/2805/5825/2875	12	3
GO:0046395	carboxylic acid catabolic process	0.000419681	0.0112419	12/184	224/10877	0.0104025	2108/4706/1738/138199/587/2806/3033/64087/51449/2805/5825/2875	12	3
GO:0016051	carbohydrate biosynthetic process	0.000421924	0.0112419	10/184	162/10877	0.0104025	5230/4706/178/4190/8604/2806/9104/4191/5239/2805	10	3
GO:0090130	tissue migration	0.000473083	0.0124665	12/184	227/10877	0.0115357	11156/64081/5797/506/284/4223/5176/23332/5629/498/54567/57142	12	3
GO:1901606	alpha-amino acid catabolic process	0.00049703	0.0129552	7/184	83/10877	0.0119879	1738/138199/587/2806/64087/2805/2875	7	3
GO:0006094	gluconeogenesis	0.000506752	0.0130666	6/184	60/10877	0.0120909	5230/4190/8604/2806/4191/2805	6	3
GO:0014866	skeletal myofibril assembly	0.000523615	0.0133578	3/184	10/10877	0.0123604	8736/5629/8557	3	3
GO:0009127	purine nucleoside monophosphate biosynthetic process	0.000579	0.0144629	9/184	139/10877	0.013383	5230/1537/516/506/5315/3939/509/5213/498	9	3
GO:0009168	purine ribonucleoside monophosphate biosynthetic process	0.000579	0.0144629	9/184	139/10877	0.013383	5230/1537/516/506/5315/3939/509/5213/498	9	3
GO:0090596	sensory organ morphogenesis	0.000645542	0.0159073	10/184	171/10877	0.0147196	9927/6935/5797/53405/4040/5629/1855/8557/55714/5916	10	3
GO:0006520	cellular amino acid metabolic process	0.000650091	0.0159073	14/184	304/10877	0.0147196	445/10768/1738/138199/587/50507/1160/10400/2806/9054/64087/51449/2805/2875	14	3
GO:0019319	hexose biosynthetic process	0.000659574	0.0159764	6/184	63/10877	0.0147834	5230/4190/8604/2806/4191/2805	6	3
GO:0009142	nucleoside triphosphate biosynthetic process	0.00067582	0.0162062	9/184	142/10877	0.0149961	5230/1537/516/506/5315/3939/509/5213/498	9	3
GO:0006105	succinate metabolic process	0.000711032	0.0168817	3/184	11/10877	0.0156212	8803/6390/6389	3	3
GO:0055002	striated muscle cell development	0.000772486	0.018161	8/184	116/10877	0.016805	8736/88/1756/1073/11155/7138/5629/8557	8	3
GO:0002011	morphogenesis of an epithelial sheet	0.000834604	0.0190608	5/184	44/10877	0.0176376	23671/4040/23332/1855/54567	5	3
GO:0035384	thioester biosynthetic process	0.000834604	0.0190608	5/184	44/10877	0.0176376	1737/5162/8050/1738/5160	5	3
GO:0071616	acyl-CoA biosynthetic process	0.000834604	0.0190608	5/184	44/10877	0.0176376	1737/5162/8050/1738/5160	5	3
GO:0009156	ribonucleoside monophosphate biosynthetic process	0.00100025	0.0225673	9/184	150/10877	0.0208822	5230/1537/516/506/5315/3939/509/5213/498	9	3
GO:0043010	camera-type eye development	0.00102294	0.0225673	11/184	214/10877	0.0208822	8736/9927/6935/5797/3913/5176/4040/5629/54567/55714/5916	11	3
GO:0003009	skeletal muscle contraction	0.00102579	0.0225673	4/184	27/10877	0.0208822	1756/4151/7138/8557	4	3
GO:0031076	embryonic camera-type eye development	0.00102579	0.0225673	4/184	27/10877	0.0208822	6935/4040/5629/5916	4	3
GO:0019217	regulation of fatty acid metabolic process	0.00107041	0.0233349	6/184	69/10877	0.0215925	1737/5162/8050/1738/9104/5160	6	3
GO:0009066	aspartate family amino acid metabolic process	0.00113163	0.0244473	5/184	47/10877	0.0226219	445/10768/1738/2806/2805	5	3
GO:0048048	embryonic eye morphogenesis	0.00118108	0.0252879	4/184	28/10877	0.0233997	6935/4040/5629/5916	4	3
GO:0032780	negative regulation of ATPase activity	0.00120208	0.0255096	3/184	13/10877	0.0236048	10105/79609/9104	3	3
GO:0010594	regulation of endothelial cell migration	0.00125762	0.0264367	8/184	125/10877	0.0244627	5797/506/284/4223/5176/5629/498/54567	8	3
GO:0042692	muscle cell differentiation	0.00126781	0.0264367	12/184	254/10877	0.0244627	8736/88/1756/9149/1073/50507/6935/11155/488/7138/5629/8557	12	3
GO:0043542	endothelial cell migration	0.00131844	0.0272553	9/184	156/10877	0.0252202	11156/5797/506/284/4223/5176/5629/498/54567	9	3
GO:0060041	retina development in camera-type eye	0.00133966	0.0274573	7/184	98/10877	0.0254071	5797/3913/5176/4040/5629/54567/5916	7	3
GO:0009124	nucleoside monophosphate biosynthetic process	0.00144103	0.0292846	9/184	158/10877	0.027098	5230/1537/516/506/5315/3939/509/5213/498	9	3
GO:0099132	ATP hydrolysis coupled cation transmembrane transport	0.00150055	0.0302379	5/184	50/10877	0.0279801	516/506/488/509/498	5	3
GO:0051146	striated muscle cell differentiation	0.00168772	0.0334952	10/184	194/10877	0.0309942	8736/88/1756/9149/1073/50507/11155/7138/5629/8557	10	3
GO:0048592	eye morphogenesis	0.00169013	0.0334952	7/184	102/10877	0.0309942	9927/6935/5797/4040/5629/55714/5916	7	3
GO:0048593	camera-type eye morphogenesis	0.00177107	0.0346269	6/184	76/10877	0.0320414	9927/6935/5797/4040/5629/55714	6	3
GO:0061061	muscle structure development	0.00177611	0.0346269	17/184	454/10877	0.0320414	8736/88/1756/4638/9149/1073/2034/50507/6935/11155/4154/488/7138/4223/5629/8557/54567	17	3
GO:0046716	muscle cell cellular homeostasis	0.00186533	0.0360731	3/184	15/10877	0.0333796	1756/1073/5213	3	3
GO:0000096	sulfur amino acid metabolic process	0.00196796	0.0377534	4/184	32/10877	0.0349344	10768/50507/9054/51449	4	3
GO:0007006	mitochondrial membrane organization	0.00199683	0.0380032	7/184	105/10877	0.0351656	516/9927/10105/506/509/498/79135	7	3
GO:1990542	mitochondrial transmembrane transport	0.00215997	0.0407844	6/184	79/10877	0.0377391	1537/516/506/8604/509/498	6	3
GO:0055003	cardiac myofibril assembly	0.0022674	0.0424784	3/184	16/10877	0.0393066	8736/5629/8557	3	3
GO:0050879	multicellular organismal movement	0.00247217	0.0456021	4/184	34/10877	0.0421971	1756/4151/7138/8557	4	3
GO:0050881	musculoskeletal movement	0.00247217	0.0456021	4/184	34/10877	0.0421971	1756/4151/7138/8557	4	3
GO:0009068	aspartate family amino acid catabolic process	0.00271925	0.0496685	3/184	17/10877	0.0459599	1738/2806/2805	3	3
GO:0030049	muscle filament sliding	0.00275476	0.0496685	4/184	35/10877	0.0459599	88/1756/7138/8557	4	3
GO:0033275	actin-myosin filament sliding	0.00275476	0.0496685	4/184	35/10877	0.0459599	88/1756/7138/8557	4	3
Gene set 55	GSE17264_MATURE_VS_DEDIFFERENTIATED_ADIPOCYTES_UP								4
ID	Description	pvalue	p.adjust	GeneRatio	BgRatio	qvalue	geneID	Count	5
Gene set 56	GSE17264_MATURE_VS_DEDIFFERENTIATED_ADIPOCYTES_DN								4
ID	Description	pvalue	p.adjust	GeneRatio	BgRatio	qvalue	geneID	Count	5
GO:0030901	midbrain development	1.39592e-07	0.000391416	10/184	66/10877	0.0003816	64770/3280/22943/10971/8655/7484/6259/2263/79971/805	10	6
GO:0010762	regulation of fibroblast migration	3.44683e-05	0.0483246	5/184	23/10877	0.0471128	55920/23603/9219/5063/673	5	6
Gene set 57	GSE17492_BRUCELLA_SUIS-INFECTED_VS_UNINFECTED_SPLEEN_UP								1
ID	Description	pvalue	p.adjust	GeneRatio	BgRatio	qvalue	geneID	Count	2
Gene set 58	GSE17492_BRUCELLA_SUIS-INFECTED_VS_UNINFECTED_SPLEEN_DN								1
ID	Description	pvalue	p.adjust	GeneRatio	BgRatio	qvalue	geneID	Count	2
GO:0072594	establishment of protein localization to organelle	3.03807e-10	8.20279e-07	29/189	431/10877	7.68791e-07	6731/6189/134266/1736/6164/3916/665/3843/6165/10075/23480/6222/10971/8031/26521/6232/7529/6136/6158/6160/5902/6730/6181/293/6142/6950/6227/9141/7879	29	3
GO:0006605	protein targeting	7.76008e-10	8.75073e-07	25/189	337/10877	8.20146e-07	6731/6189/134266/6164/665/6165/10075/23480/6222/10971/8031/26521/6232/7529/6136/6158/6160/6730/6181/293/6142/23192/6227/9141/7879	25	3
GO:0045047	protein targeting to ER	9.72303e-10	8.75073e-07	14/189	96/10877	8.20146e-07	6731/6189/6164/6165/23480/6222/6232/6136/6158/6160/6730/6181/6142/6227	14	3
GO:0072599	establishment of protein localization to endoplasmic reticulum	1.68972e-09	1.14056e-06	14/189	100/10877	1.06897e-06	6731/6189/6164/6165/23480/6222/6232/6136/6158/6160/6730/6181/6142/6227	14	3
GO:0006614	SRP-dependent cotranslational protein targeting to membrane	2.50195e-09	1.35105e-06	13/189	86/10877	1.26625e-06	6731/6189/6164/6165/6222/6232/6136/6158/6160/6730/6181/6142/6227	13	3
GO:0006613	cotranslational protein targeting to membrane	5.10912e-09	2.2991e-06	13/189	91/10877	2.15479e-06	6731/6189/6164/6165/6222/6232/6136/6158/6160/6730/6181/6142/6227	13	3
GO:0070972	protein localization to endoplasmic reticulum	2.89055e-08	1.11493e-05	14/189	124/10877	1.04494e-05	6731/6189/6164/6165/23480/6222/6232/6136/6158/6160/6730/6181/6142/6227	14	3
GO:0006401	RNA catabolic process	3.69235e-08	1.24617e-05	22/189	321/10877	1.16795e-05	6189/84153/1736/6164/27161/6165/1655/6222/1974/5720/6232/7529/6136/5515/6158/6160/5694/6181/51690/6142/3315/6227	22	3
GO:0006413	translational initiation	4.67799e-08	1.4034e-05	16/189	172/10877	1.31531e-05	6189/6164/27161/6165/6222/1974/83939/6232/6136/6158/6160/6181/8665/6142/3315/6227	16	3
GO:0000956	nuclear-transcribed mRNA catabolic process	1.20401e-07	3.25083e-05	16/189	184/10877	3.04678e-05	6189/6164/27161/6165/1655/6222/1974/6232/6136/5515/6158/6160/6181/51690/6142/6227	16	3
GO:0019080	viral gene expression	1.83637e-07	4.50745e-05	15/189	166/10877	4.22453e-05	6189/3725/6164/6165/6222/6232/6136/6158/6160/5439/6181/8665/6142/5431/6227	15	3
GO:0006402	mRNA catabolic process	2.25818e-07	5.08091e-05	20/189	298/10877	4.76199e-05	6189/6164/27161/6165/1655/6222/1974/5720/6232/7529/6136/5515/6158/6160/5694/6181/51690/6142/3315/6227	20	3
GO:0090150	establishment of protein localization to membrane	2.97401e-07	6.1768e-05	18/189	248/10877	5.78909e-05	6731/6189/6164/6165/6222/10971/6232/7529/6136/6158/6160/9341/6730/6181/6142/23192/6227/9141	18	3
GO:0006612	protein targeting to membrane	3.77874e-07	6.91323e-05	14/189	152/10877	6.4793e-05	6731/6189/6164/6165/6222/6232/6136/6158/6160/6730/6181/6142/23192/6227	14	3
GO:0000184	nuclear-transcribed mRNA catabolic process, nonsense-mediated decay	3.84913e-07	6.91323e-05	12/189	109/10877	6.4793e-05	6189/6164/6165/6222/6232/6136/5515/6158/6160/6181/6142/6227	12	3
GO:0019083	viral transcription	4.09673e-07	6.91323e-05	14/189	153/10877	6.4793e-05	6189/3725/6164/6165/6222/6232/6136/6158/6160/5439/6181/6142/5431/6227	14	3
GO:0008380	RNA splicing	3.98915e-06	0.000633571	20/189	358/10877	0.000593803	22827/3181/23013/10659/11338/57187/1655/4841/3185/6625/55677/10291/5515/1198/5439/51690/27336/9129/5431/55692	20	3
GO:0022613	ribonucleoprotein complex biogenesis	5.97042e-06	0.000895563	21/189	400/10877	0.000839351	6189/1736/6164/10659/27161/6165/6222/83939/6232/10291/6136/6158/6160/92856/6181/65008/6142/9129/6227/55692/55636	21	3
GO:0006364	rRNA processing	7.27191e-06	0.00103338	15/189	222/10877	0.000968513	6189/1736/6164/6165/6222/6232/6136/6158/6160/92856/6181/65008/6142/6227/55636	15	3
GO:0072657	protein localization to membrane	1.22186e-05	0.00164952	22/189	453/10877	0.00154598	6731/5962/6189/6164/6165/6222/10971/302/6232/7529/6136/10959/6158/6160/9341/6730/6181/6142/23192/3689/6227/9141	22	3
GO:0034660	ncRNA metabolic process	1.77546e-05	0.00206506	22/189	464/10877	0.00193544	2058/6189/3181/1736/6164/27161/6165/6222/6232/6136/6158/6160/92856/5439/6181/65008/6142/5431/2957/150962/6227/55636	22	3
GO:0034470	ncRNA processing	1.79193e-05	0.00206506	18/189	331/10877	0.00193544	6189/3181/1736/6164/27161/6165/6222/6232/6136/6158/6160/92856/6181/65008/6142/150962/6227/55636	18	3
GO:0034655	nucleobase-containing compound catabolic process	1.83451e-05	0.00206506	23/189	500/10877	0.00193544	6189/84153/1736/6164/27161/6165/1655/6222/1974/5720/6232/7529/11165/6136/5515/6158/6160/5694/6181/51690/6142/3315/6227	23	3
GO:0002274	myeloid leukocyte activation	1.83561e-05	0.00206506	22/189	465/10877	0.00193544	10092/5788/23352/3725/2896/3916/10075/1650/3516/3937/1471/302/84418/567/2215/3162/3689/6709/2950/7879/5660/1476	22	3
GO:0006397	mRNA processing	2.45726e-05	0.00263899	20/189	405/10877	0.00247334	22827/3181/23013/10659/11338/57187/1655/4841/3185/6625/55677/10291/26097/5439/51690/27336/9129/5431/55692/54623	20	3
GO:0000377	RNA splicing, via transesterification reactions with bulged adenosine as nucleophile	2.68645e-05	0.00263899	16/189	278/10877	0.00247334	22827/3181/23013/10659/11338/1655/4841/3185/6625/10291/5439/51690/27336/9129/5431/55692	16	3
GO:0000398	mRNA splicing, via spliceosome	2.68645e-05	0.00263899	16/189	278/10877	0.00247334	22827/3181/23013/10659/11338/1655/4841/3185/6625/10291/5439/51690/27336/9129/5431/55692	16	3
GO:0000375	RNA splicing, via transesterification reactions	2.80694e-05	0.00263899	16/189	279/10877	0.00247334	22827/3181/23013/10659/11338/1655/4841/3185/6625/10291/5439/51690/27336/9129/5431/55692	16	3
GO:0016072	rRNA metabolic process	2.84884e-05	0.00263899	15/189	249/10877	0.00247334	6189/1736/6164/6165/6222/6232/6136/6158/6160/92856/6181/65008/6142/6227/55636	15	3
GO:0042254	ribosome biogenesis	2.93221e-05	0.00263899	16/189	280/10877	0.00247334	6189/1736/6164/6165/6222/83939/6232/6136/6158/6160/92856/6181/65008/6142/6227/55636	16	3
GO:0043312	neutrophil degranulation	7.21979e-05	0.00628821	18/189	368/10877	0.00589351	10092/5788/23352/2896/3916/10075/1650/1471/302/84418/567/2215/3689/6709/2950/7879/5660/1476	18	3
GO:0002283	neutrophil activation involved in immune response	7.47561e-05	0.00630755	18/189	369/10877	0.00591164	10092/5788/23352/2896/3916/10075/1650/1471/302/84418/567/2215/3689/6709/2950/7879/5660/1476	18	3
GO:0043299	leukocyte degranulation	8.16522e-05	0.00668064	19/189	406/10877	0.00626131	10092/5788/23352/2896/3916/10075/1650/1471/302/84418/567/2215/3162/3689/6709/2950/7879/5660/1476	19	3
GO:0007006	mitochondrial membrane organization	8.53497e-05	0.00672268	9/189	105/10877	0.00630071	521/665/517/10971/7529/293/518/509/9141	9	3
GO:0002275	myeloid cell activation involved in immune response	8.71459e-05	0.00672268	19/189	408/10877	0.00630071	10092/5788/23352/2896/3916/10075/1650/1471/302/84418/567/2215/3162/3689/6709/2950/7879/5660/1476	19	3
GO:0042119	neutrophil activation	9.50241e-05	0.00712681	18/189	376/10877	0.00667947	10092/5788/23352/2896/3916/10075/1650/1471/302/84418/567/2215/3689/6709/2950/7879/5660/1476	18	3
GO:0002446	neutrophil mediated immunity	0.000108664	0.00774782	18/189	380/10877	0.0072615	10092/5788/23352/2896/3916/10075/1650/1471/302/84418/567/2215/3689/6709/2950/7879/5660/1476	18	3
GO:0002444	myeloid leukocyte mediated immunity	0.000109043	0.00774782	19/189	415/10877	0.0072615	10092/5788/23352/2896/3916/10075/1650/1471/302/84418/567/2215/3162/3689/6709/2950/7879/5660/1476	19	3
GO:0036230	granulocyte activation	0.000112333	0.0077769	18/189	381/10877	0.00728876	10092/5788/23352/2896/3916/10075/1650/1471/302/84418/567/2215/3689/6709/2950/7879/5660/1476	18	3
GO:0006457	protein folding	0.000217996	0.0147147	12/189	203/10877	0.0137911	10049/4820/134266/2288/6625/821/567/4802/3315/6950/83460/9141	12	3
GO:0042776	mitochondrial ATP synthesis coupled proton transport	0.000278996	0.0183729	4/189	19/10877	0.0172197	521/517/518/509	4	3
GO:0006839	mitochondrial transport	0.0004514	0.0290185	13/189	252/10877	0.0271971	521/134266/665/517/10075/10971/5250/26521/7529/293/518/509/9141	13	3
GO:0015985	energy coupled proton transport, down electrochemical gradient	0.000603668	0.0370433	4/189	23/10877	0.0347181	521/517/518/509	4	3
GO:0015986	ATP synthesis coupled proton transport	0.000603668	0.0370433	4/189	23/10877	0.0347181	521/517/518/509	4	3
GO:0035722	interleukin-12-mediated signaling pathway	0.00075849	0.0445201	5/189	42/10877	0.0417256	3181/3185/302/3716/6950	5	3
GO:0071349	cellular response to interleukin-12	0.00075849	0.0445201	5/189	42/10877	0.0417256	3181/3185/302/3716/6950	5	3
GO:0070671	response to interleukin-12	0.000846345	0.0486198	5/189	43/10877	0.045568	3181/3185/302/3716/6950	5	3
Gene set 59	GSE18343_PSEUDOPREGNANT_VS_ENDOCRINE_DISRUPTED_ENDOMETRIUM_D13_UP								4
ID	Description	pvalue	p.adjust	GeneRatio	BgRatio	qvalue	geneID	Count	5
Gene set 60	GSE18343_PSEUDOPREGNANT_VS_ENDOCRINE_DISRUPTED_ENDOMETRIUM_D13_DN								4
ID	Description	pvalue	p.adjust	GeneRatio	BgRatio	qvalue	geneID	Count	5
GO:0086004	regulation of cardiac muscle cell contraction	9.23128e-06	0.0097801	6/172	32/10877	0.00946367	54795/6717/29119/488/775/9722	6	6
GO:0086003	cardiac muscle cell contraction	1.23256e-05	0.0097801	7/172	50/10877	0.00946367	54795/6717/29119/775/23171/2257/9722	7	6
GO:1903115	regulation of actin filament-based movement	1.8829e-05	0.0097801	6/172	36/10877	0.00946367	54795/6717/29119/488/775/9722	6	6
GO:0086001	cardiac muscle cell action potential	2.34319e-05	0.0097801	7/172	55/10877	0.00946367	54795/29119/488/775/23171/2257/9722	7	6
GO:0098900	regulation of action potential	2.59975e-05	0.0097801	6/172	38/10877	0.00946367	54795/29119/488/775/2257/9722	6	6
GO:0098901	regulation of cardiac muscle cell action potential	3.10766e-05	0.0097801	5/172	24/10877	0.00946367	54795/29119/488/775/9722	5	6
GO:0086002	cardiac muscle cell action potential involved in contraction	3.52125e-05	0.0097801	6/172	40/10877	0.00946367	54795/29119/775/23171/2257/9722	6	6
GO:0086005	ventricular cardiac muscle cell action potential	3.83514e-05	0.0097801	5/172	25/10877	0.00946367	54795/29119/775/23171/9722	5	6
GO:0098911	regulation of ventricular cardiac muscle cell action potential	3.86226e-05	0.0097801	4/172	13/10877	0.00946367	54795/29119/775/9722	4	6
GO:0002027	regulation of heart rate	0.000113453	0.0241135	7/172	70/10877	0.0233333	54795/6717/29119/488/775/23171/9722	7	6
GO:0001508	action potential	0.000116388	0.0241135	8/172	94/10877	0.0233333	54795/6717/29119/488/775/23171/2257/9722	8	6
GO:0019722	calcium-mediated signaling	0.000169426	0.0313237	9/172	126/10877	0.0303102	54795/6717/84502/9104/488/3094/775/55273/1672	9	6
GO:0006941	striated muscle contraction	0.000190927	0.0313237	9/172	128/10877	0.0303102	54795/6717/29119/488/9456/775/23171/2257/9722	9	6
GO:0060048	cardiac muscle contraction	0.000192423	0.0313237	8/172	101/10877	0.0303102	54795/6717/29119/488/775/23171/2257/9722	8	6
Gene set 61	GSE18359_AD_LIB_VS_CALORIE-RESTRICTED_HIGH_FEED_EFFICACY_LIVER_UP								1
ID	Description	pvalue	p.adjust	GeneRatio	BgRatio	qvalue	geneID	Count	2
GO:0072329	monocarboxylic acid catabolic process	1.79421e-06	0.00153973	11/177	111/10877	0.00150573	55862/18/283927/2168/3033/1666/51/23175/84693/1632/5465	11	3
GO:0044282	small molecule catabolic process	2.77797e-06	0.00153973	19/177	341/10877	0.00150573	55862/18/283927/151531/51251/100/27294/2168/3033/642/1666/51/23175/84693/11112/3155/1632/36/5465	19	3
GO:0009062	fatty acid catabolic process	2.80458e-06	0.00153973	10/177	94/10877	0.00150573	55862/283927/2168/3033/1666/51/23175/84693/1632/5465	10	3
GO:0006631	fatty acid metabolic process	2.89638e-06	0.00153973	17/177	279/10877	0.00150573	6296/55862/4257/79602/283927/5354/10464/2168/3033/1666/51/57546/23175/84693/1632/36/5465	17	3
GO:0016054	organic acid catabolic process	3.6229e-06	0.00153973	15/177	224/10877	0.00150573	55862/18/283927/2168/3033/642/1666/51/23175/84693/11112/3155/1632/36/5465	15	3
GO:0046395	carboxylic acid catabolic process	3.6229e-06	0.00153973	15/177	224/10877	0.00150573	55862/18/283927/2168/3033/642/1666/51/23175/84693/11112/3155/1632/36/5465	15	3
GO:0044242	cellular lipid catabolic process	6.25064e-05	0.0227095	11/177	161/10877	0.022208	55862/283927/2168/9588/3033/1666/51/23175/84693/1632/5465	11	3
GO:0019395	fatty acid oxidation	7.55727e-05	0.0227095	8/177	86/10877	0.022208	55862/79602/2168/3033/1666/51/1632/5465	8	3
GO:0006635	fatty acid beta-oxidation	8.43462e-05	0.0227095	7/177	65/10877	0.022208	55862/2168/3033/1666/51/1632/5465	7	3
GO:0034440	lipid oxidation	8.9057e-05	0.0227095	8/177	88/10877	0.022208	55862/79602/2168/3033/1666/51/1632/5465	8	3
Gene set 62	GSE18359_AD_LIB_VS_CALORIE-RESTRICTED_HIGH_FEED_EFFICACY_LIVER_DN								1
ID	Description	pvalue	p.adjust	GeneRatio	BgRatio	qvalue	geneID	Count	2
GO:0006613	cotranslational protein targeting to membrane	6.06628e-44	1.31456e-40	38/188	91/10877	1.27967e-40	6207/6231/6191/9349/6156/6223/6144/6746/6152/6209/6201/6130/6205/11224/6136/6124/6233/6234/6189/6224/6165/6159/6164/6206/6194/6176/6146/6122/6135/6132/23521/6228/23471/6181/4736/3921/6147/6141	38	3
GO:0006614	SRP-dependent cotranslational protein targeting to membrane	1.13671e-41	1.23162e-38	36/188	86/10877	1.19893e-38	6207/6231/6191/9349/6156/6223/6144/6152/6209/6201/6130/6205/11224/6136/6124/6233/6234/6189/6224/6165/6159/6164/6206/6194/6176/6146/6122/6135/6132/23521/6228/6181/4736/3921/6147/6141	36	3
GO:0045047	protein targeting to ER	1.48151e-39	1.07014e-36	36/188	96/10877	1.04173e-36	6207/6231/6191/9349/6156/6223/6144/6152/6209/6201/6130/6205/11224/6136/6124/6233/6234/6189/6224/6165/6159/6164/6206/6194/6176/6146/6122/6135/6132/23521/6228/6181/4736/3921/6147/6141	36	3
GO:0072599	establishment of protein localization to endoplasmic reticulum	8.65197e-39	4.10228e-36	36/188	100/10877	3.99338e-36	6207/6231/6191/9349/6156/6223/6144/6152/6209/6201/6130/6205/11224/6136/6124/6233/6234/6189/6224/6165/6159/6164/6206/6194/6176/6146/6122/6135/6132/23521/6228/6181/4736/3921/6147/6141	36	3
GO:0000184	nuclear-transcribed mRNA catabolic process, nonsense-mediated decay	9.46534e-39	4.10228e-36	37/188	109/10877	3.99338e-36	6207/6231/6191/9349/6156/6223/6144/6152/6209/6201/6130/6205/11224/6136/6124/6233/6234/6189/6224/6165/6159/6164/6206/6194/6176/6146/6122/4116/6135/6132/23521/6228/6181/4736/3921/6147/6141	37	3
GO:0000956	nuclear-transcribed mRNA catabolic process	6.44886e-36	2.32911e-33	42/188	184/10877	2.26728e-33	6207/6231/6191/9349/6156/6223/6144/6152/6209/6201/6130/6205/11224/6136/6124/6741/6233/28960/6234/6189/6224/1977/6165/6159/6164/6206/6194/6176/6146/4292/6122/4116/6135/6132/23521/6228/6181/4736/3921/51690/6147/6141	42	3
GO:0019083	viral transcription	2.35388e-35	7.28694e-33	39/188	153/10877	7.0935e-33	6207/6231/6191/9349/6156/6223/6144/6152/6209/6201/6130/6205/1660/11224/6136/6124/6233/6234/6189/6224/6165/6159/6164/6206/6194/6176/6146/6122/6597/7936/6135/6132/23521/6228/6181/4736/3921/6147/6141	39	3
GO:0019080	viral gene expression	3.3397e-35	9.04642e-33	40/188	166/10877	8.80627e-33	6207/6231/6191/9349/6156/6223/6144/6152/6209/6201/6130/6205/1660/11224/6136/6124/6741/6233/6234/6189/6224/6165/6159/6164/6206/6194/6176/6146/6122/6597/7936/6135/6132/23521/6228/6181/4736/3921/6147/6141	40	3
GO:0070972	protein localization to endoplasmic reticulum	6.85571e-35	1.6507e-32	36/188	124/10877	1.60688e-32	6207/6231/6191/9349/6156/6223/6144/6152/6209/6201/6130/6205/11224/6136/6124/6233/6234/6189/6224/6165/6159/6164/6206/6194/6176/6146/6122/6135/6132/23521/6228/6181/4736/3921/6147/6141	36	3
GO:0006612	protein targeting to membrane	4.29588e-34	9.30918e-32	38/188	152/10877	9.06206e-32	6207/6231/6191/9349/6156/6223/6144/6746/6152/6209/6201/6130/6205/11224/6136/6124/6233/6234/6189/6224/6165/6159/6164/6206/6194/6176/6146/6122/6135/6132/23521/6228/23471/6181/4736/3921/6147/6141	38	3
GO:0006402	mRNA catabolic process	1.89261e-32	3.72844e-30	47/188	298/10877	3.62947e-30	6207/6231/23589/6191/9349/6156/6223/6144/6152/6209/6201/6130/6205/1660/11224/6136/6124/6741/6233/28960/6234/6189/6224/1977/6165/5685/6159/6164/6206/6194/3192/6176/6146/4292/6122/5705/4116/6135/6132/23521/6228/6181/4736/3921/51690/6147/6141	47	3
GO:0006413	translational initiation	6.78395e-32	1.22507e-29	38/188	172/10877	1.19255e-29	6207/6231/27335/6191/9349/6156/6223/6144/6152/6209/6201/6130/6205/11224/6136/6124/6233/6234/6189/6224/1977/6165/6159/6164/6206/6194/6176/6146/6122/6135/6132/23521/6228/6181/4736/3921/6147/6141	38	3
GO:0006401	RNA catabolic process	6.15488e-31	1.02597e-28	47/188	321/10877	9.98736e-29	6207/6231/23589/6191/9349/6156/6223/6144/6152/6209/6201/6130/6205/1660/11224/6136/6124/6741/6233/28960/6234/6189/6224/1977/6165/5685/6159/6164/6206/6194/3192/6176/6146/4292/6122/5705/4116/6135/6132/23521/6228/6181/4736/3921/51690/6147/6141	47	3
GO:0034660	ncRNA metabolic process	1.71457e-30	2.6539e-28	54/188	464/10877	2.58345e-28	6207/6231/6191/2091/9349/6156/6223/6144/6152/6209/6201/6130/80755/6205/11224/25917/57117/6136/6124/55511/6897/6741/6233/6234/6189/6224/6165/6159/54517/6164/6206/2617/6194/6176/10056/6146/6122/92856/55174/6597/6135/55278/10360/6132/23521/6228/6181/4736/2972/3921/6147/7702/6141/10352	54	3
GO:0042254	ribosome biogenesis	3.90657e-29	5.64369e-27	43/188	280/10877	5.49387e-27	6207/6231/6191/2091/9349/6156/6223/6144/6152/6209/6201/6130/6205/11224/6136/6124/6233/65003/6234/6189/6224/6165/6159/6164/6206/6194/6176/6146/6122/92856/55153/6135/10360/6132/23521/6228/6181/4736/3921/54680/6147/6141/55052	43	3
GO:0016072	rRNA metabolic process	5.2426e-29	7.10044e-27	41/188	249/10877	6.91195e-27	6207/6231/6191/2091/9349/6156/6223/6144/6152/6209/6201/6130/6205/11224/6136/6124/6233/6234/6189/6224/6165/6159/6164/6206/6194/6176/6146/6122/92856/6597/6135/10360/6132/23521/6228/6181/4736/2972/3921/6147/6141	41	3
GO:0006364	rRNA processing	1.07581e-28	1.37134e-26	39/188	222/10877	1.33493e-26	6207/6231/6191/2091/9349/6156/6223/6144/6152/6209/6201/6130/6205/11224/6136/6124/6233/6234/6189/6224/6165/6159/6164/6206/6194/6176/6146/6122/92856/6135/10360/6132/23521/6228/6181/4736/3921/6147/6141	39	3
GO:0022613	ribonucleoprotein complex biogenesis	1.35345e-28	1.6294e-26	49/188	400/10877	1.58615e-26	6207/6231/6191/2091/9349/6156/6223/6144/6152/6209/6201/6130/6205/1660/11224/6136/6124/8607/6233/65003/6234/6189/6224/6165/6159/10728/6164/6206/6194/6176/6146/6122/92856/55153/6135/27316/10360/6132/23521/6228/6633/54496/6181/4736/3921/54680/6147/6141/55052	49	3
GO:0034470	ncRNA processing	3.63225e-28	4.14267e-26	45/188	331/10877	4.0327e-26	6207/6231/6191/2091/9349/6156/6223/6144/6152/6209/6201/6130/6205/11224/25917/57117/6136/6124/55511/6741/6233/6234/6189/6224/6165/6159/54517/6164/6206/6194/6176/6146/6122/92856/55174/6135/10360/6132/23521/6228/6181/4736/3921/6147/6141	45	3
GO:0090150	establishment of protein localization to membrane	6.21401e-28	6.73289e-26	40/188	248/10877	6.55415e-26	6207/6231/6191/9349/6156/6223/6144/6746/6152/6209/6201/6130/6205/11224/6136/6124/6233/6234/6189/6224/6165/6159/6164/6206/6194/6176/6146/6122/6135/55204/6132/23521/6228/23471/6181/4736/3921/6147/6141/841	40	3
GO:0006605	protein targeting	9.951e-25	1.02685e-22	42/188	337/10877	9.99589e-23	6207/6231/6191/10490/9349/6156/6223/6144/6746/6152/6209/6201/6130/6205/11224/6136/6124/8607/6233/6234/6189/6224/6165/6159/6164/6206/6194/6176/6146/6122/59286/6135/6132/8546/23521/6228/23471/6181/4736/3921/6147/6141	42	3
GO:0034655	nucleobase-containing compound catabolic process	2.37329e-22	2.33769e-20	47/188	500/10877	2.27563e-20	6207/6231/23589/6191/9349/6156/6223/6144/6152/6209/6201/6130/6205/1660/11224/6136/6124/6741/6233/28960/6234/6189/6224/1977/6165/5685/6159/6164/6206/6194/3192/6176/6146/4292/6122/5705/4116/6135/6132/23521/6228/6181/4736/3921/51690/6147/6141	47	3
GO:0072594	establishment of protein localization to organelle	1.97772e-21	1.86336e-19	43/188	431/10877	1.81389e-19	6207/6231/6191/10490/9349/6156/6223/6144/6152/6209/6201/6130/6205/11224/10575/6136/6124/8607/6233/6234/6189/6224/6165/6159/6164/6206/6194/6176/6146/6122/59286/6135/22948/6132/8546/23521/6228/6181/4736/3921/6147/6141/841	43	3
GO:0072657	protein localization to membrane	1.39005e-20	1.2551e-18	43/188	453/10877	1.22178e-18	6207/6231/6191/10490/9349/6156/6223/6144/6746/6152/6209/6201/6130/6205/11224/6136/6124/6233/6234/6189/6224/6165/6159/6164/6206/6194/6176/6146/29098/6122/6135/55204/6132/23521/6228/23471/6181/4736/3921/6147/6141/841/6281	43	3
GO:0002181	cytoplasmic translation	2.22902e-18	1.93211e-16	20/188	79/10877	1.88082e-16	6231/6156/6152/6201/1660/6124/6234/6189/6224/6165/6159/6176/6146/6135/6132/23521/6228/6181/4736/6141	20	3
GO:0022618	ribonucleoprotein complex assembly	3.60982e-11	3.00865e-09	20/188	181/10877	2.92878e-09	6223/6152/6209/1660/6136/8607/65003/6234/10728/6122/6135/27316/23521/6228/6633/54496/3921/54680/6147/55052	20	3
GO:0071826	ribonucleoprotein complex subunit organization	8.78448e-11	7.05036e-09	20/188	190/10877	6.8632e-09	6223/6152/6209/1660/6136/8607/65003/6234/10728/6122/6135/27316/23521/6228/6633/54496/3921/54680/6147/55052	20	3
GO:0042273	ribosomal large subunit biogenesis	5.08338e-10	3.93418e-08	12/188	62/10877	3.82974e-08	6152/6130/11224/6136/65003/6165/6122/55153/6135/4736/6147/55052	12	3
GO:0042255	ribosome assembly	8.0069e-10	5.98309e-08	11/188	51/10877	5.82426e-08	6223/6152/6209/6136/65003/6234/6122/6135/3921/6147/55052	11	3
GO:0000027	ribosomal large subunit assembly	2.05332e-07	1.48318e-05	7/188	26/10877	1.44381e-05	6152/6136/65003/6122/6135/6147/55052	7	3
GO:0006403	RNA localization	9.19949e-07	6.43074e-05	15/188	189/10877	6.26003e-05	2091/6209/1660/10575/8607/6741/1977/10189/3192/55153/4116/22948/6428/3921/54680	15	3
GO:0006414	translational elongation	1.03644e-06	7.01866e-05	12/188	120/10877	6.83234e-05	10884/64975/1937/65003/1936/28973/6176/64928/6181/128308/55052/3396	12	3
GO:0032543	mitochondrial translation	4.57705e-06	0.00030056	11/188	115/10877	0.000292581	10884/64975/65003/2617/28973/64928/55278/128308/55052/10352/3396	11	3
GO:0140053	mitochondrial gene expression	2.13342e-05	0.00135974	11/188	135/10877	0.00132364	10884/64975/65003/2617/28973/64928/55278/128308/55052/10352/3396	11	3
GO:0070125	mitochondrial translational elongation	6.87334e-05	0.00413737	8/188	80/10877	0.00402753	10884/64975/65003/28973/64928/128308/55052/3396	8	3
GO:0070126	mitochondrial translational termination	6.87334e-05	0.00413737	8/188	80/10877	0.00402753	10884/64975/65003/28973/64928/128308/55052/3396	8	3
GO:0000377	RNA splicing, via transesterification reactions with bulged adenosine as nucleophile	9.44388e-05	0.0053855	15/188	278/10877	0.00524253	9716/220988/1660/28960/10189/4154/3192/56259/59286/4116/27316/6633/54496/6428/51690	15	3
GO:0000398	mRNA splicing, via spliceosome	9.44388e-05	0.0053855	15/188	278/10877	0.00524253	9716/220988/1660/28960/10189/4154/3192/56259/59286/4116/27316/6633/54496/6428/51690	15	3
GO:0000375	RNA splicing, via transesterification reactions	9.83108e-05	0.00546255	15/188	279/10877	0.00531754	9716/220988/1660/28960/10189/4154/3192/56259/59286/4116/27316/6633/54496/6428/51690	15	3
GO:0000028	ribosomal small subunit assembly	0.000101641	0.00550638	4/188	15/10877	0.00536021	6223/6209/6234/3921	4	3
[truncated: 4,788 more rows]
